# Supplementary material for: Comparative transcriptomic analysis reveals the regulatory effects of inorganic nitrogen on the biosynthesis of Monascus pigments and citrinin
Source: Royal Society of Chemistry journal article supplement (doi:10.1039/c9ra09760k), 2020-01-01
Supplement: c9ra09760k1.xlsx [file c9ra09760k1.xlsx]

## Sheet: Supplementary Data S1
Supplementary Data S1 Analysis of nonredundant (Nr) classification
M VS ML
#NrGeneID	Database_ID	E_value	Identity	Score	Up-/down-regulated	log2FC	Annotation
gene5930	gi|52000443|dbj|BAD44749.1|	0	1319/1355(97.34)	2649	Down-regulated	-1.59583	citrinin polyketide synthase [Monascus purpureus]
gene8071	gi|106879081|dbj|BAE95340.1|	0	480/512(93.75)	881	Down-regulated	-3.20303	citrinin biosynthesis transporter CtnC [Monascus purpureus]
gene283	gi|106879078|dbj|BAE95337.1|	0	470/499(94.19)	874	Down-regulated	-1.17824	citrinin biosynthesis transcriptional activator CtnR [Monascus purpureus]
gene2068	gi|145253026|ref|XP_001398026.1|	0	430/650(66.15)	724	Down-regulated	-2.20465	bZIP transcription factor [Aspergillus niger CBS 513.88]
gene7306	gi|121711848|ref|XP_001273539.1|	1.68516e-146	295/433(68.13)	436	Down-regulated	-1.91212	bZIP transcription factor (HacA), putative [Aspergillus clavatus NRRL 1]
gene7727	gi|315047650|ref|XP_003173200.1|	8.80498e-114	209/453(46.14)	375	Down-regulated	-1.71792	fungal specific transcription factor domain-containing protein [Microsporum gypseum CBS 118893]
gene5251	gi|358365927|dbj|GAA82548.1|	7.38784e-18	83/151(54.97)	91	Down-regulated	-2.42932	b-zip transcription factor [Aspergillus kawachii IFO 4308]
gene6613	gi|71002376|ref|XP_755869.1|	1.89144e-09	50/143(34.97)	68	Down-regulated	-2.23268	AflR-like C6 transcription factor [Aspergillus fumigatus Af293]
gene4488	gi|121719554|ref|XP_001276476.1|	0	620/755(82.12)	1168	Up-regulated	1.64716	fungal specific transcription factor domain protein [Aspergillus clavatus NRRL 1]
gene5724	gi|121701231|ref|XP_001268880.1|	0	383/661(57.94)	670	Up-regulated	2.0673	C2H2 transcription factor (Rpn4), putative [Aspergillus clavatus NRRL 1]
gene5850	gi|119479519|ref|XP_001259788.1|	4.48578e-78	167/277(60.29)	249	Up-regulated	1.7311	transcription factor RfeG, putative [Neosartorya fischeri NRRL 181]
gene6903	gi|391871934|gb|EIT81083.1|	0	458/784(58.42)	873	Up-regulated	1.16946	C6 transcription factor [Aspergillus oryzae 3.042]
gene7479	gi|358365526|dbj|GAA82148.1|	0	372/498(74.70)	629	Up-regulated	1.05264	C2H2 transcription factor [Aspergillus kawachii IFO 4308]
gene7615	gi|146322622|ref|XP_752594.2|	0	334/487(68.58)	537	Up-regulated	2.12388	transcriptional elongation factor Iws1 [Aspergillus fumigatus Af293]
gene1007	gi|119497469|ref|XP_001265493.1|	0	570/864(65.97)	942	Up-regulated	1.57542	C6 transcription factor, putative [Neosartorya fischeri NRRL 181]
gene1163	gi|599155783|gb|EYE94972.1|	0	418/685(61.02)	842	Up-regulated	1.32884	putative C6 transcription factor [Aspergillus ruber CBS 135680]
gene3196	gi|119477061|ref|XP_001259233.1|	6.85858e-144	231/492(46.95)	441	Up-regulated	3.52423	C6 transcription factor, putative [Neosartorya fischeri NRRL 181]
gene3528	gi|391868605|gb|EIT77815.1|	0	917/1605(57.13)	1726	Up-regulated	1.21343	RNA polymerase II transcription mediator [Aspergillus oryzae 3.042]
gene3558	gi|119500716|ref|XP_001267115.1|	1.15544e-146	303/590(51.36)	448	Up-regulated	1.7632	C2H2 transcription factor (Seb1), putative, putative [Neosartorya fischeri NRRL 181]
gene3787	gi|70999414|ref|XP_754426.1|	2.51277e-106	168/299(56.19)	323	Up-regulated	1.83688	transcription regulator PAB1642 [Aspergillus fumigatus Af293]
gene4184	gi|300827233|gb|ADK36628.1|	0	280/425(65.88)	547	Up-regulated	2.22063	Zn cluster transcription factor [Aspergillus fumigatus Af293]
Monascus_purpureus_newGene_369	gi|512134514|gb|AGN98101.1|	0	631/633(99.68)	1291	Up-regulated	1.32958	non-reducing polyketide synthase, partial [Monascus purpureus]
M VS MX
#NrGeneID	Database_ID	E_value	Identity	Score	Up-/down-regulated		Annotation
gene465	gi|238505154|ref|XP_002383806.1|	0	412/632(65.19)	710	Down-regulated	-1.00324	transcription factor (SPT8), putative [Aspergillus flavus NRRL3357]
gene5251	gi|358365927|dbj|GAA82548.1|	7.38784e-18	83/151(54.97)	91	Down-regulated	-2.70739	b-zip transcription factor [Aspergillus kawachii IFO 4308]
gene5930	gi|52000443|dbj|BAD44749.1|	0	1319/1355(97.34)	2649	Down-regulated	-2.97907	citrinin polyketide synthase [Monascus purpureus]
gene7727	gi|315047650|ref|XP_003173200.1|	8.80498e-114	209/453(46.14)	375	Down-regulated	-1.13499	fungal specific transcription factor domain-containing protein [Microsporum gypseum CBS 118893]
gene8071	gi|106879081|dbj|BAE95340.1|	0	480/512(93.75)	881	Down-regulated	-5.79262	citrinin biosynthesis transporter CtnC [Monascus purpureus]
gene283	gi|106879078|dbj|BAE95337.1|	0	470/499(94.19)	874	Down-regulated	-1.50468	citrinin biosynthesis transcriptional activator CtnR [Monascus purpureus]
gene4488	gi|121719554|ref|XP_001276476.1|	0	620/755(82.12)	1168	Up-regulated	1.39723	fungal specific transcription factor domain protein [Aspergillus clavatus NRRL 1]
gene5724	gi|121701231|ref|XP_001268880.1|	0	383/661(57.94)	670	Up-regulated	2.94618	C2H2 transcription factor (Rpn4), putative [Aspergillus clavatus NRRL 1]
gene5851	gi|145253364|ref|XP_001398195.1|	0	607/897(67.67)	1099	Up-regulated	1.17244	C6 transcription factor (Ctf1B) [Aspergillus niger CBS 513.88]
gene6675	gi|119481811|ref|XP_001260934.1|	2.78578e-155	258/353(73.09)	453	Up-regulated	1.0478	CCAAT-binding transcription factor subunit HAPB [Neosartorya fischeri NRRL 181]
gene6903	gi|391871934|gb|EIT81083.1|	0	458/784(58.42)	873	Up-regulated	2.20241	C6 transcription factor [Aspergillus oryzae 3.042]
gene7479	gi|358365526|dbj|GAA82148.1|	0	372/498(74.70)	629	Up-regulated	1.72261	C2H2 transcription factor [Aspergillus kawachii IFO 4308]
gene7615	gi|146322622|ref|XP_752594.2|	0	334/487(68.58)	537	Up-regulated	2.12799	transcriptional elongation factor Iws1 [Aspergillus fumigatus Af293]
gene1146	gi|666428699|gb|KEY76349.1|	0	497/746(66.62)	968	Up-regulated	1.06797	transcription factor fungal specific [Aspergillus fumigatus var. RP-2014]
gene1163	gi|599155783|gb|EYE94972.1|	0	418/685(61.02)	842	Up-regulated	1.10186	putative C6 transcription factor [Aspergillus ruber CBS 135680]
gene2534	gi|666432599|gb|KEY80175.1|	0	558/870(64.14)	914	Up-regulated	1.35694	transcription factor GATA AreA [Aspergillus fumigatus var. RP-2014]
gene2694	gi|599151670|gb|EYE91093.1|	0	473/647(73.11)	893	Up-regulated	1.01435	fungal-specific transcription factor domain protein [Aspergillus ruber CBS 135680]
gene3049	gi|317138215|ref|XP_001816756.2|	0	295/455(64.84)	584	Up-regulated	1.25841	zinc knuckle transcription factor (CnjB) [Aspergillus oryzae RIB40]
gene3196	gi|119477061|ref|XP_001259233.1|	6.85858e-144	231/492(46.95)	441	Up-regulated	3.05288	C6 transcription factor, putative [Neosartorya fischeri NRRL 181]
gene3528	gi|391868605|gb|EIT77815.1|	0	917/1605(57.13)	1726	Up-regulated	2.07174	RNA polymerase II transcription mediator [Aspergillus oryzae 3.042]
gene3558	gi|119500716|ref|XP_001267115.1|	1.15544e-146	303/590(51.36)	448	Up-regulated	1.3613	C2H2 transcription factor (Seb1), putative, putative [Neosartorya fischeri NRRL 181]
gene4184	gi|300827233|gb|ADK36628.1|	0	280/425(65.88)	547	Up-regulated	2.65741	Zn cluster transcription factor [Aspergillus fumigatus Af293]
Monascus_purpureus_newGene_1307	gi|21541268|emb|CAC94008.1|	8.1354e-176	299/301(99.34)	553	Up-regulated	4.16785	polyketide synthase [Monascus purpureus]
Monascus_purpureus_newGene_371	gi|21541268|emb|CAC94008.1|	0	694/708(98.02)	1338	Up-regulated	2.77437	polyketide synthase [Monascus purpureus]
Monascus_purpureus_newGene_372	gi|21541268|emb|CAC94008.1|	0	567/580(97.76)	1070	Up-regulated	1.8387	polyketide synthase [Monascus purpureus]

## Sheet: Supplementary Data S2
Supplementary Data S2 Analysis of gene ontology (GO) classification
M vs. ML
#GO_classify1	GO_classify2	All gene	DE gene	%
#Total_gene		5178	403	0.0778293
biological process	biological adhesion	1	0	0
biological process	biological regulation	689	39	0.0566038
biological process	cell killing	1	0	0
biological process	cellular component organization or biogenesis	432	17	0.0393519
biological process	cellular process	2936	235	0.0800409
biological process	developmental process	165	15	0.0909091
biological process	growth	68	5	0.0735294
biological process	immune system process	1	0	0
biological process	localization	872	83	0.0951835
biological process	metabolic process	3716	300	0.080732
biological process	multi-organism process	77	11	0.142857
biological process	multicellular organismal process	47	4	0.0851064
biological process	reproduction	112	13	0.116071
biological process	reproductive process	79	9	0.113924
biological process	response to stimulus	461	33	0.0715835
biological process	signaling	83	1	0.0120482
biological process	single-organism process	2461	240	0.0975213
cellular component	cell	1925	103	0.0535065
cellular component	cell part	1926	103	0.0534787
cellular component	extracellular region	107	15	0.140187
cellular component	macromolecular complex	735	19	0.0258503
cellular component	membrane	998	103	0.103206
cellular component	membrane part	728	79	0.108516
cellular component	membrane-enclosed lumen	125	5	0.04
cellular component	nucleoid	6	0	0
cellular component	organelle	1384	51	0.0368497
cellular component	organelle part	696	18	0.0258621
cellular component	virion	4	0	0
cellular component	virion part	4	0	0
molecular function	antioxidant activity	26	2	0.0769231
molecular function	binding	2316	165	0.0712435
molecular function	catalytic activity	3116	268	0.0860077
molecular function	electron carrier activity	62	5	0.0806452
molecular function	enzyme regulator activity	52	0	0
molecular function	guanyl-nucleotide exchange factor activity	18	1	0.0555556
molecular function	metallochaperone activity	3	0	0
molecular function	molecular transducer activity	30	1	0.0333333
molecular function	nucleic acid binding transcription factor activity	118	10	0.0847458
molecular function	protein binding transcription factor activity	15	0	0
molecular function	protein tag	2	0	0
molecular function	receptor activity	3	0	0
molecular function	structural molecule activity	134	0	0
molecular function	transporter activity	318	49	0.154088
M vs. MX
#GO_classify1	GO_classify2	All gene	DE gene	%
#Total_gene		5178	697	0.134608
biological process	biological adhesion	1	0	0
biological process	biological regulation	689	71	0.103048
biological process	cell killing	1	0	0
biological process	cellular component organization or biogenesis	432	44	0.101852
biological process	cellular process	2936	396	0.134877
biological process	developmental process	165	31	0.187879
biological process	growth	68	4	0.0588235
biological process	immune system process	1	1	1
biological process	localization	872	124	0.142202
biological process	metabolic process	3716	520	0.139935
biological process	multi-organism process	77	14	0.181818
biological process	multicellular organismal process	47	9	0.191489
biological process	reproduction	112	23	0.205357
biological process	reproductive process	79	17	0.21519
biological process	response to stimulus	461	58	0.125813
biological process	signaling	83	7	0.0843373
biological process	single-organism process	2461	395	0.160504
cellular component	cell	1925	207	0.107532
cellular component	cell part	1926	207	0.107477
cellular component	extracellular region	107	28	0.261682
cellular component	macromolecular complex	735	52	0.0707483
cellular component	membrane	998	146	0.146293
cellular component	membrane part	728	110	0.151099
cellular component	membrane-enclosed lumen	125	15	0.12
cellular component	nucleoid	6	0	0
cellular component	organelle	1384	118	0.0852601
cellular component	organelle part	696	48	0.0689655
cellular component	virion	4	0	0
cellular component	virion part	4	0	0
molecular function	antioxidant activity	26	6	0.230769
molecular function	binding	2316	289	0.124784
molecular function	catalytic activity	3116	465	0.14923
molecular function	electron carrier activity	62	10	0.16129
molecular function	enzyme regulator activity	52	0	0
molecular function	guanyl-nucleotide exchange factor activity	18	2	0.111111
molecular function	metallochaperone activity	3	0	0
molecular function	molecular transducer activity	30	3	0.1
molecular function	nucleic acid binding transcription factor activity	118	18	0.152542
molecular function	protein binding transcription factor activity	15	2	0.133333
molecular function	protein tag	2	0	0
molecular function	receptor activity	3	0	0
molecular function	structural molecule activity	134	4	0.0298507
molecular function	transporter activity	318	61	0.191824

## Sheet: Supplementary Data S3
Supplementary Data S3 Analysis of KEGG classification
M vs. ML
#KEGG_n	109	KEGG_N	1842
#Pathway	ko_ID	DEG	Gene	DEG_all	Gene_all
Fatty acid metabolism	ko01212	6	28	109	1842	gene1004;gene4553;gene4987;gene5849;gene7067;gene7339	K10251+K10256+K00667+K00507+K00626+K00059
Pentose phosphate pathway	ko00030	4	20	109	1842	gene1276;gene3064;gene5012;gene7384	K01810+K00851+K00850+K01808
Spliceosome	ko03040	1	84	109	1842	gene2831	K12627
Butanoate metabolism	ko00650	2	23	109	1842	gene1499;gene7067	K01580+K00626
Steroid biosynthesis	ko00100	1	21	109	1842	gene487	K00222
Carbon metabolism	ko01200	19	112	109	1842	gene1276;gene1572;gene1970;gene2543;gene2832;gene3064;gene3318;gene4323;gene4426;gene4863;gene5012;gene517;gene5672;gene5806;gene601;gene6768;gene7067;gene7384;gene828	K01810+K01689+K00925+K14454+K14454+K00851+K00122+K00873+K17069+K00844+K00850+K14454+K17989+K15633+K00927+K00134+K00626+K01808+K00600
Nicotinate and nicotinamide metabolism	ko00760	1	15	109	1842	gene2613	K06210
Pantothenate and CoA biosynthesis	ko00770	4	23	109	1842	gene2461;gene3595;gene4635;gene6969	K01922+K01922+K00053+K06133
Fructose and mannose metabolism	ko00051	3	32	109	1842	gene4863;gene5012;gene7384	K00844+K00850+K01808
Alanine, aspartate and glutamate metabolism	ko00250	7	31	109	1842	gene1499;gene2543;gene2832;gene517;gene7344;gene762;gene901	K01580+K14454+K14454+K14454+K01424+K00264+K00262
Proteasome	ko03050	1	33	109	1842	gene4556	K06699
One carbon pool by folate	ko00670	1	14	109	1842	gene828	K00600
Biotin metabolism	ko00780	1	9	109	1842	gene7339	K00059
Endocytosis	ko04144	2	43	109	1842	gene1285;gene7281	K01115+K01115
Phagosome	ko04145	1	38	109	1842	gene2308	K05692
Non-homologous end-joining	ko03450	3	9	109	1842	gene2900;gene3239;gene6848	K10885+K10884+K10981
2-Oxocarboxylic acid metabolism	ko01210	5	38	109	1842	gene2543;gene2832;gene4635;gene517;gene6158	K14454+K14454+K00053+K14454+K00928
Thiamine metabolism	ko00730	2	6	109	1842	gene1717;gene3170	K18278+K03146
Purine metabolism	ko00230	1	89	109	1842	gene4323	K00873
Nitrogen metabolism	ko00910	3	15	109	1842	gene762;gene7950;gene901	K00264+K00459+K00262
Propanoate metabolism	ko00640	2	26	109	1842	gene1970;gene7067	K00925+K00626
Ribosome biogenesis in eukaryotes	ko03008	1	68	109	1842	gene5727	K14566
Glycerophospholipid metabolism	ko00564	4	47	109	1842	gene1285;gene2846;gene7281;gene7769	K01115+K00111+K01115+K01114
Taurine and hypotaurine metabolism	ko00430	2	8	109	1842	gene1499;gene1970	K01580+K00925
Sulfur metabolism	ko00920	1	17	109	1842	gene4426	K17069
Peroxisome	ko04146	2	53	109	1842	Monascus_purpureus_newGene_300;gene5052	K00477+K04564
Methane metabolism	ko00680	6	27	109	1842	gene1572;gene1970;gene3318;gene5012;gene5806;gene828	K01689+K00925+K00122+K00850+K15633+K00600
Lysine biosynthesis	ko00300	1	11	109	1842	gene6158	K00928
Arginine and proline metabolism	ko00330	9	51	109	1842	gene1128;gene1461;gene1829;gene2543;gene2832;gene3365;gene517;gene7922;gene901	K01426+K01426+K00274+K14454+K14454+K00286+K14454+K00286+K00262
Histidine metabolism	ko00340	1	17	109	1842	gene1829	K00274
Sphingolipid metabolism	ko00600	1	14	109	1842	gene3658	K04713
Degradation of aromatic compounds	ko01220	2	22	109	1842	gene3767;gene6275	K13953+K03381
Selenocompound metabolism	ko00450	1	8	109	1842	gene143	K00549
Glutathione metabolism	ko00480	1	29	109	1842	gene855	K01469
Base excision repair	ko03410	2	20	109	1842	gene3530;gene3740	K03660+K10771
Ubiquitin mediated proteolysis	ko04120	1	54	109	1842	gene2716	K03363
RNA degradation	ko03018	3	52	109	1842	gene1572;gene2831;gene5012	K01689+K12627+K00850
Glyoxylate and dicarboxylate metabolism	ko00630	3	29	109	1842	gene3318;gene7067;gene828	K00122+K00626+K00600
Cysteine and methionine metabolism	ko00270	8	38	109	1842	gene143;gene2543;gene2832;gene4426;gene517;gene5672;gene6158;gene6519	K00549+K14454+K14454+K17069+K14454+K17989+K00928+K01697
Glycolysis / Gluconeogenesis	ko00010	11	48	109	1842	gene1276;gene1572;gene2848;gene3767;gene4323;gene4720;gene4863;gene5012;gene5806;gene601;gene6768	K01810+K01689+K01568+K13953+K00873+K01568+K00844+K00850+K15633+K00927+K00134
Glycine, serine and threonine metabolism	ko00260	9	50	109	1842	gene1612;gene1829;gene3077;gene4203;gene5672;gene5806;gene6158;gene6519;gene828	K00276+K00274+K00643+K00276+K17989+K15633+K00928+K01697+K00600
Tyrosine metabolism	ko00350	12	36	109	1842	Monascus_purpureus_newGene_1209;gene1612;gene1829;gene2232;gene2543;gene2832;gene3767;gene4062;gene4203;gene517;gene5771;gene799	K00545+K00276+K00274+K00451+K14454+K14454+K13953+K01555+K00276+K14454+K00457+K00545
Porphyrin and chlorophyll metabolism	ko00860	2	21	109	1842	gene2079;gene3077	K00228+K00643
Synthesis and degradation of ketone bodies	ko00072	1	8	109	1842	gene7067	K00626
RNA transport	ko03013	1	89	109	1842	gene575	K03259
Ubiquinone and other terpenoid-quinone biosynthesis	ko00130	1	9	109	1842	gene5771	K00457
Various types of N-glycan biosynthesis	ko00513	1	25	109	1842	gene120	K05535
Carotenoid biosynthesis	ko00906	1	2	109	1842	gene4122	K17819
Valine, leucine and isoleucine degradation	ko00280	5	32	109	1842	Monascus_purpureus_newGene_979;gene1158;gene6243;gene7067;gene995	K00166+K00253+K09699+K00626+K01969
Lysine degradation	ko00310	1	22	109	1842	gene7067	K00626
MAPK signaling pathway - yeast	ko04011	1	25	109	1842	gene6801	K04627
Valine, leucine and isoleucine biosynthesis	ko00290	2	17	109	1842	gene4635;gene5672	K00053+K17989
Inositol phosphate metabolism	ko00562	2	23	109	1842	gene7748;gene7769	K00010+K01114
beta-Alanine metabolism	ko00410	3	23	109	1842	gene1499;gene1612;gene4203	K01580+K00276+K00276
Cyanoamino acid metabolism	ko00460	2	14	109	1842	gene7344;gene828	K01424+K00600
Pyruvate metabolism	ko00620	3	32	109	1842	gene1970;gene4323;gene7067	K00925+K00873+K00626
Amino sugar and nucleotide sugar metabolism	ko00520	7	49	109	1842	gene1276;gene2019;gene4490;gene4863;gene5842;gene6954;gene7846	K01810+K00849+K01443+K00844+K01183+K01784+K00326
Riboflavin metabolism	ko00740	1	20	109	1842	gene1562	K01078
Biosynthesis of amino acids	ko01230	21	118	109	1842	gene143;gene1572;gene2543;gene2832;gene3365;gene4323;gene4426;gene4635;gene5012;gene517;gene5672;gene5806;gene601;gene6158;gene6519;gene6768;gene7384;gene762;gene7778;gene7922;gene828	K00549+K01689+K14454+K14454+K00286+K00873+K17069+K00053+K00850+K14454+K17989+K15633+K00927+K00928+K01697+K00134+K01808+K00264+K00766+K00286+K00600
Ether lipid metabolism	ko00565	3	16	109	1842	gene1285;gene7281;gene7769	K01115+K01115+K01114
Tryptophan metabolism	ko00380	7	39	109	1842	gene1128;gene1461;gene1829;gene3582;gene3853;gene4430;gene7067	K01426+K01426+K00274+K00463+K00463+K01556+K00626
Phenylalanine metabolism	ko00360	9	34	109	1842	gene1128;gene1461;gene1612;gene1829;gene2543;gene2832;gene4203;gene517;gene5771	K01426+K01426+K00276+K00274+K14454+K14454+K00276+K14454+K00457
Fatty acid biosynthesis	ko00061	2	11	109	1842	gene4987;gene7339	K00667+K00059
Oxidative phosphorylation	ko00190	2	76	109	1842	gene126;gene542	K01535+K01535
Meiosis - yeast	ko04113	3	56	109	1842	gene1708;gene1738;gene2716	K08139+K08139+K03363
Fatty acid elongation	ko00062	1	8	109	1842	gene1004	K10251
Cell cycle - yeast	ko04111	1	75	109	1842	gene2716	K03363
Terpenoid backbone biosynthesis	ko00900	2	19	109	1842	gene5168;gene7067	K08658+K00626
Starch and sucrose metabolism	ko00500	6	36	109	1842	gene1012;gene1276;gene4863;gene4936;gene5026;gene6569	K01213+K01810+K00844+K01187+K00697+K01196
Pentose and glucuronate interconversions	ko00040	3	19	109	1842	gene1012;gene3442;gene5080	K01213+K18102+K17818
Galactose metabolism	ko00052	5	23	109	1842	gene2019;gene4863;gene4936;gene5012;gene6954	K00849+K00844+K01187+K00850+K01784
SNARE interactions in vesicular transport	ko04130	3	15	109	1842	gene141;gene6308;gene65	K08515+K08516+K08496
Fatty acid degradation	ko00071	2	20	109	1842	gene3767;gene7067	K13953+K00626
Biosynthesis of unsaturated fatty acids	ko01040	4	14	109	1842	gene1004;gene4553;gene5849;gene7339	K10251+K10256+K00507+K00059
Phenylalanine, tyrosine and tryptophan biosynthesis	ko00400	4	19	109	1842	gene2543;gene2832;gene517;gene7778	K14454+K14454+K14454+K00766
M vs. MX
#KEGG_n	231	KEGG_N	1842
#Pathway	ko_ID	DEG	Gene	DEG_all	Gene_all
Phagosome	ko04145	5	38	231	1842	gene2308;gene3604;gene3799;gene4518;gene7659	K05692+K02150+K05692+K08008+K02155
Meiosis - yeast	ko04113	9	56	231	1842	gene1708;gene1738;gene1928;gene2716;gene3131;gene5362;gene5670;gene6518;gene6838	K08139+K08139+K02542+K03363+K02541+K02210+K03114+K02212+K12769
Protein processing in endoplasmic reticulum	ko04141	6	75	231	1842	gene2411;gene3278;gene5647;gene5718;gene6575;gene8044	K09503+K14002+K09503+K04079+K01230+K09540
Peroxisome	ko04146	5	53	231	1842	gene2172;gene3990;gene5052;gene6432;gene7266	K03781+K03781+K04564+K00232+K15628
Pantothenate and CoA biosynthesis	ko00770	6	23	231	1842	gene1427;gene2461;gene3595;gene4635;gene6969;gene7786	K01652+K01922+K01922+K00053+K06133+K00826
Glycosylphosphatidylinositol(GPI)-anchor biosynthesis	ko00563	3	17	231	1842	gene2091;gene3114;gene6746	K05291+K03434+K08098
Sulfur relay system	ko04122	1	9	231	1842	gene798	K11996
Spliceosome	ko03040	4	84	231	1842	gene1830;gene2126;gene2831;gene7954	K12883+K12876+K12627+K12852
One carbon pool by folate	ko00670	2	14	231	1842	gene3303;gene828	K00287+K00600
Base excision repair	ko03410	4	20	231	1842	gene3530;gene3740;gene582;gene7545	K03660+K10771+K10747+K03505
Fructose and mannose metabolism	ko00051	3	32	231	1842	gene4516;gene4863;gene6125	K00966+K00844+K00008
Cysteine and methionine metabolism	ko00270	11	38	231	1842	gene2220;gene2543;gene2616;gene4426;gene517;gene5627;gene5672;gene5972;gene6158;gene6519;gene7420	K01251+K14454+K00789+K17069+K14454+K00133+K17989+K01738+K00928+K01697+K00641
Synthesis and degradation of ketone bodies	ko00072	2	8	231	1842	gene7067;gene7563	K00626+K01641
Fatty acid degradation	ko00071	3	20	231	1842	gene3977;gene6432;gene7067	K00493+K00232+K00626
Fatty acid biosynthesis	ko00061	1	11	231	1842	gene7867	K00059
Nitrogen metabolism	ko00910	8	15	231	1842	gene1650;gene2529;gene3967;gene4171;gene5591;gene762;gene7950;gene901	K02575+K10534+K17877+K17877+K15877+K00264+K00459+K00262
Arginine and proline metabolism	ko00330	12	51	231	1842	gene1461;gene1829;gene2463;gene2543;gene3365;gene4418;gene517;gene6958;gene7169;gene901;gene956;gene998	K01426+K00274+K01940+K14454+K00286+K00472+K14454+K00294+K01426+K00262+K00620+K00611
Arachidonic acid metabolism	ko00590	1	4	231	1842	gene2294	K14674
Phenylalanine, tyrosine and tryptophan biosynthesis	ko00400	9	19	231	1842	gene1551;gene2543;gene4865;gene5124;gene517;gene6419;gene6811;gene7061;gene7778	K01736+K14454+K01626+K01694+K14454+K01657+K13830+K01626+K00766
Phosphatidylinositol signaling system	ko04070	1	12	231	1842	gene3498	K05857
Carotenoid biosynthesis	ko00906	1	2	231	1842	gene2841	K17819
Porphyrin and chlorophyll metabolism	ko00860	4	21	231	1842	gene1061;gene1433;gene2079;gene3077	K01698+K00589+K00228+K00643
Various types of N-glycan biosynthesis	ko00513	2	25	231	1842	gene120;gene6575	K05535+K01230
Thiamine metabolism	ko00730	2	6	231	1842	gene1717;gene3170	K18278+K03146
DNA replication	ko03030	8	32	231	1842	gene1366;gene1928;gene3131;gene4841;gene5362;gene582;gene6518;gene7545	K10755+K02542+K02541+K02321+K02210+K10747+K02212+K03505
Alanine, aspartate and glutamate metabolism	ko00250	11	31	231	1842	gene1499;gene2463;gene2543;gene517;gene6512;gene6912;gene6958;gene7344;gene7484;gene762;gene901	K01580+K01940+K14454+K14454+K13524+K01955+K00294+K01424+K00814+K00264+K00262
Ribosome	ko03010	1	97	231	1842	gene89	K02992
Pyrimidine metabolism	ko00240	3	65	231	1842	gene4841;gene6912;gene7545	K02321+K01955+K03505
Amino sugar and nucleotide sugar metabolism	ko00520	10	49	231	1842	gene1276;gene128;gene2019;gene4490;gene4516;gene4863;gene5586;gene5842;gene6954;gene7846	K01810+K00698+K00849+K01443+K00966+K00844+K01183+K01183+K01784+K00326
Methane metabolism	ko00680	6	27	231	1842	gene1078;gene1970;gene3318;gene5806;gene7883;gene828	K00831+K00925+K00122+K15633+K00058+K00600
Propanoate metabolism	ko00640	4	26	231	1842	gene1970;gene6512;gene7067;gene7652	K00925+K13524+K00626+K18369
Fatty acid elongation	ko00062	1	8	231	1842	gene1408	K01074
Taurine and hypotaurine metabolism	ko00430	2	8	231	1842	gene1499;gene1970	K01580+K00925
Homologous recombination	ko03440	2	19	231	1842	gene4579;gene7545	K04482+K03505
Glycosphingolipid biosynthesis - globo series	ko00603	1	2	231	1842	gene3402	K07407
Valine, leucine and isoleucine degradation	ko00280	8	32	231	1842	Monascus_purpureus_newGene_979;gene1158;gene6243;gene6512;gene7067;gene7563;gene7786;gene995	K00166+K00253+K09699+K13524+K00626+K01641+K00826+K01969
Sulfur metabolism	ko00920	2	17	231	1842	gene4426;gene5972	K17069+K01738
Vitamin B6 metabolism	ko00750	4	8	231	1842	gene1078;gene4723;gene5254;gene5256	K00831+K01733+K08681+K06215
ABC transporters	ko02010	2	7	231	1842	gene2891;gene7266	K05658+K15628
Purine metabolism	ko00230	5	89	231	1842	gene3985;gene4841;gene6219;gene7497;gene7545	K01515+K02321+K01952+K01951+K03505
Starch and sucrose metabolism	ko00500	6	36	231	1842	gene1012;gene1276;gene4863;gene5026;gene6919;gene7232	K01213+K01810+K00844+K00697+K01210+K05349
Nucleotide excision repair	ko03420	4	40	231	1842	Monascus_purpureus_newGene_107;gene1366;gene582;gene7545	K10841+K10755+K10747+K03505
Linoleic acid metabolism	ko00591	1	7	231	1842	gene2294	K14674
Ubiquinone and other terpenoid-quinone biosynthesis	ko00130	2	9	231	1842	gene2416;gene5771	K00457+K00457
Galactose metabolism	ko00052	5	23	231	1842	gene2019;gene236;gene3402;gene4863;gene6954	K00849+K01684+K07407+K00844+K01784
Oxidative phosphorylation	ko00190	7	76	231	1842	gene126;gene1635;gene3604;gene4097;gene4644;gene542;gene7659	K01535+K03940+K02150+K03885+K01535+K01535+K02155
2-Oxocarboxylic acid metabolism	ko01210	11	38	231	1842	gene1427;gene2543;gene3730;gene4635;gene517;gene5627;gene6158;gene7484;gene7786;gene8018;gene956	K01652+K14454+K01655+K00053+K14454+K00133+K00928+K00814+K00826+K01649+K00620
Glycerolipid metabolism	ko00561	2	21	231	1842	gene2294;gene3402	K14674+K07407
SNARE interactions in vesicular transport	ko04130	3	15	231	1842	gene320;gene6308;gene65	K08490+K08516+K08496
Glyoxylate and dicarboxylate metabolism	ko00630	5	29	231	1842	gene2172;gene3318;gene3990;gene7067;gene828	K03781+K00122+K03781+K00626+K00600
Steroid biosynthesis	ko00100	4	21	231	1842	gene1922;gene2294;gene3946;gene487	K09827+K14674+K00559+K00222
Ubiquitin mediated proteolysis	ko04120	1	54	231	1842	gene2716	K03363
Glycerophospholipid metabolism	ko00564	7	47	231	1842	gene13;gene2294;gene2846;gene4386;gene6751;gene7281;gene7769	K01114+K14674+K00111+K01613+K16369+K01115+K01114
Inositol phosphate metabolism	ko00562	5	23	231	1842	gene13;gene1323;gene3498;gene7748;gene7769	K01114+K01771+K05857+K00010+K01114
Proteasome	ko03050	7	33	231	1842	gene1113;gene1840;gene2727;gene3249;gene3401;gene4556;gene7022	K03063+K02736+K03030+K02729+K03066+K06699+K02734
Butanoate metabolism	ko00650	5	23	231	1842	gene1427;gene1499;gene6512;gene7067;gene7563	K01652+K01580+K13524+K00626+K01641
Mismatch repair	ko03430	3	23	231	1842	gene1366;gene582;gene7545	K10755+K10747+K03505
Sphingolipid metabolism	ko00600	4	14	231	1842	gene1265;gene3402;gene3658;gene7965	K04708+K07407+K04713+K04711
Biotin metabolism	ko00780	1	9	231	1842	gene7867	K00059
Aminoacyl-tRNA biosynthesis	ko00970	2	40	231	1842	gene1624;gene76	K01893+K01876
Ribosome biogenesis in eukaryotes	ko03008	5	68	231	1842	gene1025;gene1793;gene246;gene5727;gene5759	K14550+K12618+K14572+K14566+K03539
N-Glycan biosynthesis	ko00510	1	30	231	1842	gene6575	K01230
Nicotinate and nicotinamide metabolism	ko00760	1	15	231	1842	gene4746	K06210
Cyanoamino acid metabolism	ko00460	3	14	231	1842	gene7232;gene7344;gene828	K05349+K01424+K00600
Folate biosynthesis	ko00790	2	9	231	1842	gene3303;gene3627	K00287+K01930
Degradation of aromatic compounds	ko01220	2	22	231	1842	gene1553;gene2418	K00480+K00480
beta-Alanine metabolism	ko00410	4	23	231	1842	gene1499;gene4203;gene6512;gene7940	K01580+K00276+K13524+K00276
Phenylalanine metabolism	ko00360	10	34	231	1842	gene1461;gene1466;gene1829;gene2416;gene2543;gene4203;gene517;gene5771;gene7169;gene7940	K01426+K01593+K00274+K00457+K14454+K00276+K14454+K00457+K01426+K00276
Pentose and glucuronate interconversions	ko00040	4	19	231	1842	gene1012;gene5080;gene6125;gene8020	K01213+K17818+K00008+K05351
Glycolysis / Gluconeogenesis	ko00010	7	48	231	1842	gene1276;gene2848;gene4863;gene5806;gene601;gene6768;gene6948	K01810+K01568+K00844+K15633+K00927+K00134+K01568
Pentose phosphate pathway	ko00030	2	20	231	1842	gene1276;gene3064	K01810+K00851
Lysine degradation	ko00310	4	22	231	1842	Monascus_purpureus_newGene_526;Monascus_purpureus_newGene_697;gene5452;gene7067	K00293+K11422+K00293+K00626
RNA degradation	ko03018	2	52	231	1842	gene1793;gene2831	K12618+K12627
Sesquiterpenoid and triterpenoid biosynthesis	ko00909	1	3	231	1842	gene6910	K12249
Glycine, serine and threonine metabolism	ko00260	17	50	231	1842	gene1009;gene1078;gene1829;gene3077;gene4203;gene4723;gene5124;gene5627;gene5672;gene5806;gene6158;gene6519;gene6911;gene7685;gene7883;gene7940;gene828	K01620+K00831+K00274+K00643+K00276+K01733+K01694+K00133+K17989+K15633+K00928+K01697+K00281+K01620+K00058+K00276+K00600
alpha-Linolenic acid metabolism	ko00592	2	5	231	1842	gene2294;gene6432	K14674+K00232
C5-Branched dibasic acid metabolism	ko00660	1	3	231	1842	gene1427	K01652
Tryptophan metabolism	ko00380	12	39	231	1842	gene1461;gene1466;gene1829;gene2172;gene3582;gene3853;gene3977;gene3990;gene4118;gene4430;gene7067;gene7169	K01426+K01593+K00274+K03781+K00463+K00463+K00493+K03781+K00463+K01556+K00626+K01426
Fatty acid metabolism	ko01212	6	28	231	1842	gene1408;gene4553;gene5849;gene6432;gene7067;gene7867	K01074+K10256+K00507+K00232+K00626+K00059
Cell cycle - yeast	ko04111	6	75	231	1842	gene1928;gene2716;gene3131;gene5362;gene5670;gene6518	K02542+K03363+K02541+K02210+K03114+K02212
Pyruvate metabolism	ko00620	6	32	231	1842	gene194;gene1970;gene3730;gene4;gene7067;gene8018	K00027+K00925+K01655+K00101+K00626+K01649
Carbon metabolism	ko01200	20	112	231	1842	gene1078;gene1276;gene194;gene1970;gene2543;gene3064;gene3318;gene4426;gene4863;gene517;gene5672;gene5806;gene5972;gene601;gene6768;gene6911;gene7067;gene7484;gene7883;gene828	K00831+K01810+K00027+K00925+K14454+K00851+K00122+K17069+K00844+K14454+K17989+K15633+K01738+K00927+K00134+K00281+K00626+K00814+K00058+K00600
Basal transcription factors	ko03022	1	31	231	1842	gene621	K03135
Tyrosine metabolism	ko00350	13	36	231	1842	gene1466;gene1829;gene2232;gene2416;gene2543;gene2601;gene4062;gene4203;gene511;gene517;gene5771;gene7940;gene799	K01593+K00274+K00451+K00457+K14454+K01800+K01555+K00276+K00680+K14454+K00457+K00276+K00545
Ether lipid metabolism	ko00565	4	16	231	1842	gene13;gene2294;gene7281;gene7769	K01114+K14674+K01115+K01114
Endocytosis	ko04144	1	43	231	1842	gene7281	K01115
Lysine biosynthesis	ko00300	5	11	231	1842	Monascus_purpureus_newGene_526;gene3730;gene5452;gene5627;gene6158	K00293+K01655+K00293+K00133+K00928
Glutathione metabolism	ko00480	3	29	231	1842	gene3420;gene359;gene855	K00799+K01469+K01469
mRNA surveillance pathway	ko03015	4	45	231	1842	gene1830;gene2126;gene2819;gene5189	K12883+K12876+K14400+K14405
Terpenoid backbone biosynthesis	ko00900	4	19	231	1842	gene1123;gene7067;gene7563;gene8094	K00587+K00626+K01641+K00938
Riboflavin metabolism	ko00740	2	20	231	1842	gene1562;gene7899	K01078+K01078
Biosynthesis of unsaturated fatty acids	ko01040	4	14	231	1842	gene4553;gene5849;gene6432;gene7867	K10256+K00507+K00232+K00059
Histidine metabolism	ko00340	3	17	231	1842	gene1466;gene1815;gene1829	K01593+K14152+K00274
Valine, leucine and isoleucine biosynthesis	ko00290	5	17	231	1842	gene1427;gene4635;gene5672;gene7786;gene8018	K01652+K00053+K17989+K00826+K01649
RNA transport	ko03013	5	89	231	1842	gene1830;gene2126;gene575;gene5759;gene7763	K12883+K12876+K03259+K03539+K05019
Biosynthesis of amino acids	ko01230	39	118	231	1842	Monascus_purpureus_newGene_526;gene1009;gene1078;gene1427;gene1551;gene1815;gene2463;gene2543;gene2616;gene3365;gene3730;gene4426;gene4635;gene4723;gene4865;gene5124;gene517;gene5452;gene5627;gene5672;gene5806;gene5972;gene601;gene6158;gene6419;gene6519;gene6768;gene6811;gene7061;gene7484;gene762;gene7685;gene7778;gene7786;gene7883;gene8018;gene828;gene956;gene998	K00293+K01620+K00831+K01652+K01736+K14152+K01940+K14454+K00789+K00286+K01655+K17069+K00053+K01733+K01626+K01694+K14454+K00293+K00133+K17989+K15633+K01738+K00927+K00928+K01657+K01697+K00134+K13830+K01626+K00814+K00264+K01620+K00766+K00826+K00058+K01649+K00600+K00620+K00611
MAPK signaling pathway - yeast	ko04011	2	25	231	1842	gene5263;gene6801	K11213+K04627
Protein export	ko03060	2	17	231	1842	gene3825;gene8044	K09647+K09540
Non-homologous end-joining	ko03450	2	9	231	1842	gene3239;gene6848	K10884+K10981

## Sheet: Supplementary Data S4
Supplementary Data S4 The up-/down-regulated of KEGG classification
M vs. ML
KO number	Gene ID	Gene annotation	Up-/down-regulated	KEGG metabolic pathways
K17989	gene5672	L-threonine ammonia-lyase	Up-regulated	Glycine, serine and threonine metabolism; Cysteine and methionine metabolism; Valine, leucine and isoleucine biosynthesis
K17069	gene4426	O-acetylserine sulfhydrylase	Up-regulated	Cysteine and methionine metabolism
K15633	gene5806	2,3-bisphosphoglycerate-independent phosphoglycerate mutase	Up-regulated	Glycolysis / Gluconeogenesis
K14454	gene2832	aspartate aminotransferase, cytoplasmic	Down-regulated	Phenylalanine metabolism; Tyrosine metabolism
K13953	gene3767	alcohol dehydrogenase, propanol-preferring	Up-regulated	Glycolysis / Gluconeogenesis
K01810	gene1276	glucose-6-phosphate isomerase	Up-regulated	Glycolysis / Gluconeogenesis; Pentose phosphate pathway; Starch and sucrose metabolism
K01697	gene6519	cystathionine beta-synthase	Up-regulated	Glycine, serine and threonine metabolism; Cysteine and methionine metabolism
K01689	gene1572	enolase	Up-regulated	Glycolysis / Gluconeogenesis
K01568	gene2848	pyruvate decarboxylase	Up-regulated	Glycolysis / Gluconeogenesis
K01555	gene4062	fumarylacetoacetase	Down-regulated	Tyrosine metabolism
K01426	gene1461	amidase	Down-regulated	Phenylalanine metabolism
K00928	gene6158	aspartate kinase	Up-regulated	Glycine, serine and threonine metabolism; Cysteine and methionine metabolism; Lysine biosynthesis
K00927	gene601	phosphoglycerate kinase	Up-regulated	Glycolysis / Gluconeogenesis
K00873	gene4323	pyruvate kinase	Up-regulated	Glycolysis / Gluconeogenesis
K00850	gene5012	6-phosphofructokinase 1	Up-regulated	Glycolysis / Gluconeogenesis; Pentose phosphate pathway; Fructose and mannose metabolism
K00844	gene4863	hexokinase	Up-regulated	Glycolysis / Gluconeogenesis; Fructose and mannose metabolism; Starch and sucrose metabolism
K00766	gene7778	anthranilate phosphoribosyltransferase	Up-regulated	Phenylalanine, tyrosine and tryptophan biosynthesis
K00600	gene828	glycine hydroxymethyltransferase	Up-regulated	Glycine, serine and threonine metabolism
K00549	gene143	5-methyltetrahydropteroyltriglutamate--homocysteine methyltransferase	Up-regulated	Cysteine and methionine metabolism
K00545	Monascus_purpureus_newGene_1209;gene799	catechol O-methyltransferase	Down-regulated	Tyrosine metabolism
K00457	gene5771	4-hydroxyphenylpyruvate dioxygenase	Down-regulated	Phenylalanine metabolism; Tyrosine metabolism
K00451	gene2232	homogentisate 1,2-dioxygenase	Down-regulated	Tyrosine metabolism
K00276	gene1612;gene4203	primary-amine oxidase	Down-regulated	Phenylalanine metabolism; Tyrosine metabolism
K00274	gene1829	monoamine oxidase	Down-regulated	Phenylalanine metabolism
K00274	gene2232	monoamine oxidase	Down-regulated	Tyrosine metabolism
K00134	gene6768	glyceraldehyde 3-phosphate dehydrogenase	Up-regulated	Glycolysis / Gluconeogenesis
K00053	gene4635	ketol-acid reductoisomerase	Up-regulated	Valine, leucine and isoleucine biosynthesis
M vs. MX
KO number	Gene ID	Gene annotation	Up-/down-regulated	KEGG metabolic pathways
K17989	gene5672	L-serine/L-threonine ammonia-lyase	Up-regulated	Glycine, serine and threonine metabolism; Cysteine and methionine metabolism; Valine, leucine and isoleucine biosynthesis
K17877	gene3967;gene4171	nitrite reductase (NAD(P)H)	Up-regulated	Nitrogen metabolism
K17069	gene4426	O-acetylhomoserine/O-acetylserine sulfhydrylase	Up-regulated	Cysteine and methionine metabolism
K15877	gene5591	fungal nitric oxide reductase	Up-regulated	Nitrogen metabolism
K15633	gene5806	2,3-bisphosphoglycerate-independent phosphoglycerate mutase	Up-regulated	Glycine, serine and threonine metabolism
K14454	gene2543;gene517	aspartate aminotransferase, cytoplasmic	Up-regulated	Phenylalanine, tyrosine and tryptophan biosynthesis
K14152	gene1815	phosphoribosyl-ATP pyrophosphohydrolase / phosphoribosyl-AMP cyclohydrolase / histidinol dehydrogenase	Up-regulated	Histidine metabolism
K13830	gene6811	pentafunctional AROM polypeptide	Up-regulated	Phenylalanine, tyrosine and tryptophan biosynthesis
K10534	gene2529	nitrate reductase (NAD(P)H)	Up-regulated	Nitrogen metabolism
K02575	gene1650	MFS transporter, NNP family, nitrate/nitrite transporter	Up-regulated	Nitrogen metabolism
K01940	gene2463	argininosuccinate synthase	Up-regulated	Arginine biosynthesis
K01736	gene1551	chorismate synthase	Up-regulated	Phenylalanine, tyrosine and tryptophan biosynthesis
K01733	gene4723	threonine synthase	Up-regulated	Glycine, serine and threonine metabolism
K01697	gene6519	cystathionine beta-synthase	Up-regulated	Glycine, serine and threonine metabolism; Cysteine and methionine metabolism
K01694	gene5124	tryptophan synthase	Up-regulated	Glycine, serine and threonine metabolism; Phenylalanine, tyrosine and tryptophan biosynthesis
K01657	gene6419	anthranilate synthase component I	Up-regulated	Phenylalanine, tyrosine and tryptophan biosynthesis
K01655	gene3730	homocitrate synthase	Up-regulated	Lysine biosynthesis
K01652	gene1427	acetolactate synthase I/II/III large subunit	Up-regulated	Valine, leucine and isoleucine biosynthesis
K01649	gene8018	2-isopropylmalate synthase	Up-regulated	Valine, leucine and isoleucine biosynthesis
K01626	gene4865;gene7061	3-deoxy-7-phosphoheptulonate synthase	Up-regulated	Phenylalanine, tyrosine and tryptophan biosynthesis
K01620	gene1009	threonine aldolase	Up-regulated	Glycine, serine and threonine metabolism
K01593	gene1466	aromatic-L-amino-acid/L-tryptophan decarboxylase	Down-regulated	Tyrosine metabolism
K01555	gene4062	fumarylacetoacetase	Down-regulated	Tyrosine metabolism
K00928	gene6158	aspartate kinase	Up-regulated	Glycine, serine and threonine metabolism; Cysteine and methionine metabolism; Lysine biosynthesis
K00831	gene1078	phosphoserine aminotransferase	Up-regulated	Glycine, serine and threonine metabolism
K00826	gene7786	branched-chain amino acid aminotransferase	Up-regulated	Cysteine and methionine metabolism; Valine, leucine and isoleucine biosynthesis
K00789	gene2616	S-adenosylmethionine synthetase	Up-regulated	Cysteine and methionine metabolism
K00766	gene7778	anthranilate phosphoribosyltransferase	Up-regulated	Phenylalanine, tyrosine and tryptophan biosynthesis
K00643	gene3077	5-aminolevulinate synthase	Up-regulated	Glycine, serine and threonine metabolism
K00620	gene956	glutamate N-acetyltransferase / amino-acid N-acetyltransferase	Up-regulated	Arginine biosynthesis
K00611	gene998	ornithine carbamoyltransferase	Up-regulated	Arginine biosynthesis; Alanine, aspartate and glutamate metabolism
K00600	gene828	glycine hydroxymethyltransferase	Up-regulated	Glycine, serine and threonine metabolism
K00545	gene799	catechol O-methyltransferase	Down-regulated	Tyrosine metabolism
K00459	gene7950	nitronate monooxygenase	Up-regulated	Nitrogen metabolism
K00457	gene5771	4-hydroxyphenylpyruvate dioxygenase	Down-regulated	Tyrosine metabolism
K00451	gene2232	homogentisate 1,2-dioxygenase	Down-regulated	Tyrosine metabolism
K00293	Monascus_purpureus_newGene_526;gene5452	saccharopine dehydrogenase	Up-regulated	Lysine biosynthesis
K00281	gene6911	glycine dehydrogenase	Up-regulated	Glycine, serine and threonine metabolism
K00276	gene4203	primary-amine oxidase	Down-regulated	Tyrosine metabolism
K00274	gene1829	monoamine oxidase	Down-regulated	Tyrosine metabolism
K00264	gene762	glutamate synthase (NADPH/NADH)	Up-regulated	Nitrogen metabolism
K00262	gene901	glutamate dehydrogenase (NADP+)	Up-regulated	Nitrogen metabolism
K00133	gene5627	aspartate-semialdehyde dehydrogenase	Up-regulated	Glycine, serine and threonine metabolism; Cysteine and methionine metabolism; Lysine biosynthesis
K00058	gene7883	D-3-phosphoglycerate dehydrogenase / 2-oxoglutarate reductase	Up-regulated	Glycine, serine and threonine metabolism
K00053	gene4635	ketol-acid reductoisomerase	Up-regulated	Valine, leucine and isoleucine biosynthesis
MX vs. ML
KO number	Gene ID	Gene annotation	Up-/down-regulated	Metabolic pathways
K17877	gene3967;gene4171	nitrite reductase (NAD(P)H)	Down-regulated	Nitrogen metabolism
K15877	gene5591	fungal nitric oxide reductase	Down-regulated	Nitrogen metabolism
K14454	gene2832;gene517		Down-regulated	Phenylalanine, tyrosine and tryptophan biosynthesis; Alanine, aspartate and glutamate metabolism; Tyrosine metabolism; Arginine and proline metabolism; Cysteine and methionine metabolism
K14152	gene1815	phosphoribosyl-ATP pyrophosphohydrolase / phosphoribosyl-AMP cyclohydrolase / histidinol dehydrogenase	Down-regulated	Histidine metabolism
K10534	gene2529	nitrate reductase (NAD(P)H)	Down-regulated	Nitrogen metabolism
K02575	gene1650	MFS transporter, NNP family, nitrate/nitrite transporter	Down-regulated	Nitrogen metabolism
K01694	gene5124	tryptophan synthase	Down-regulated	Glycine, serine and threonine metabolism; Phenylalanine, tyrosine and tryptophan biosynthesis
K01626	gene4865;gene7061	3-deoxy-7-phosphoheptulonate synthase	Down-regulated	Phenylalanine, tyrosine and tryptophan biosynthesis
K00831	gene1078	phosphoserine aminotransferase	Down-regulated	Glycine, serine and threonine metabolism
K00766	gene7778	anthranilate phosphoribosyltransferase	Down-regulated	Phenylalanine, tyrosine and tryptophan biosynthesis
K00620	gene956	glutamate N-acetyltransferase / amino-acid N-acetyltransferase	Down-regulated	Arginine biosynthesis
K00459	gene7950	nitronate monooxygenase	Down-regulated	Nitrogen metabolism
K00293	Monascus_purpureus_newGene_526	saccharopine dehydrogenase (NADP+, L-glutamate forming)	Down-regulated	Lysine biosynthesis; Lysine degradation
K00286	gene7922	pyrroline-5-carboxylate reductase	Down-regulated	Arginine and proline metabolism

## Sheet: Supplementary Data S5
Supplementary Data S5 The Differentially Expressed Genes involved in biosynthesis of amino acids and Carbon metabolism pathway
M vs. ML
#ID	regulated	FDR	log2FC	NR_annotation
gene1128	up	0.00259775	1.64562	acetamidase [Monascus purpureus]
gene1276	up	5.82866e-14	1.21138	glucose-6-phosphate isomerase [Neosartorya fischeri NRRL 181]
gene143	up	0.000286749	1.35366	5-methyltetrahydropteroyltriglutamate--homocysteine methyltransferase [Aspergillus oryzae RIB40]
gene1461	down	4.62745e-13	-1.45478	hypothetical protein HMPREF1541_10987 [Cyphellophora europaea CBS 101466]
gene1572	up	1.71585e-07	1.22878	Enolase [Penicillium digitatum Pd1]
gene1612	down	1.43421e-08	-1.14852	copper amine oxidase 1 [Aspergillus niger CBS 513.88]
gene1829	down	1.63623e-18	-4.80649	amine oxidase [Microsporum gypseum CBS 118893]
gene2232	down	1.88216e-14	-1.75387	homogentisate 1,2-dioxygenase [Aspergillus terreus NIH2624]
gene2543	up	5.51117e-10	1.24884	aspartate transaminase, putative [Aspergillus fumigatus A1163]
gene2832	down	1.29509e-06	-1.2884	aspartate aminotransferase [Aspergillus fumigatus var. RP-2014]
gene2848	up	1.31387e-88	3.5757	pyruvate decarboxylase, putative [Byssochlamys spectabilis No. 5]
gene3365	down	4.9012e-05	-1.84253	NADP oxidoreductase, coenzyme F420-dependent [Penicillium italicum]
gene3582	down	1.04234e-09	-2.07675	indoleamine 2,3-dioxygenase pyrrole 2,3-dioxygenase) [Neosartorya fischeri NRRL 181]
gene3767	up	1.23189e-49	2.38792	alcohol dehydrogenase 2 [Aspergillus oryzae RIB40]
gene3853	down	5.63431e-29	-2.14533	indoleamine 2,3 dioxygenase [Aspergillus fumigatus var. RP-2014]
gene4062	down	2.19512e-09	-1.18589	fumarylacetoacetate hydrolase FahA [Aspergillus fumigatus Af293]
gene4323	up	3.22718e-10	1.08909	pyruvate kinase [Aspergillus oryzae RIB40]
gene4426	up	6.52301e-54	2.68749	O-acetylhomoserine [Coccidioides immitis RS]
gene4430	down	6.46232e-31	-2.3799	L-kynurenine hydrolase [Aspergillus oryzae 3.042]
gene4635	up	1.5206e-38	2.05985	Ketol-acid reductoisomerase [Byssochlamys spectabilis No. 5]
gene4720	down	9.41001e-05	-1.32792	pyruvate decarboxylase [Byssochlamys spectabilis No. 5]
gene4863	up	3.58309e-28	1.80932	hexokinase Kxk, putative [Aspergillus clavatus NRRL 1]
gene5012	up	4.68584e-19	1.41361	6-phosphofructokinase alpha subunit [Aspergillus clavatus NRRL 1]
gene517	up	1.5125e-09	1.56777	Aspartate/other aminotransferase [Penicillium italicum]
gene5672	up	1.79385e-28	2.53904	l-serine dehydratase [Neosartorya fischeri NRRL 181]
gene5771	down	2.36136e-21	-1.86076	4-hydroxyphenylpyruvate dioxygenase [Aspergillus fumigatus Af293]
gene5806	up	3.79167e-10	1.03706	phosphoglycerate mutase, 2,3-bisphosphoglycerate-independent [Aspergillus fumigatus Af293]
gene601	up	6.63984e-08	3.45574	phosphoglycerate kinase PgkA [Aspergillus kawachii IFO 4308]
gene6158	up	3.85734e-10	1.10088	aspartokinase [Aspergillus ruber CBS 135680]
gene6519	up	4.2705e-08	Inf	cystathionine beta-synthase [Coccidioides immitis RS]
gene6768	up	1.90202e-09	1.09994	RecName: Full=Glyceraldehyde-3-phosphate dehydrogenase; Short=GAPDH [Monascus purpureus]
gene7067	down	3.47508e-13	-1.17516	acetyl-CoA acetyltransferase, putative [Neosartorya fischeri NRRL 181]
gene7384	down	0.00248333	-1.4381	ribose/galactose isomerase, putative [Aspergillus clavatus NRRL 1]
gene762	up	2.65853e-08	1.2458	glutamate synthase Glt1 [Aspergillus fumigatus Af293]
gene7778	up	3.89874e-06	1.42603	putative anthranilate phosphoribosyltransferase [Aspergillus ruber CBS 135680]
gene7922	down	1.09637e-07	-3.29253	pyrroline-5-carboxylate reductase [Neosartorya fischeri NRRL 181]
gene799	down	2.80353e-08	-1.49116	putative catechol O-methyltransferase 1 [Talaromyces marneffei PM1]
gene828	up	3.50144e-11	1.18046	serine hydroxymethyltransferase [Aspergillus terreus NIH2624]
Monascus_purpureus_newGene_1209	down	0.00662065	-2.22261	hypothetical protein TCE0_060r18866 [Talaromyces cellulolyticus]
M vs. MX
#ID	regulated	FDR	log2FC	NR_annotation
gene1009	up	2.92e-06	1.95551	putative threonine aldolase [Aspergillus ruber CBS 135680]
gene1078	up	8.07e-33	2.66413	Phosphoserine aminotransferase [Penicillium roqueforti FM164]
gene1427	up	3.97e-09	1.06371	acetolactate synthase catalytic subunit [Aspergillus niger CBS 513.88]
gene1499	up	1.55e-21	1.59991	glutamate decarboxylase [Aspergillus fumigatus Af293]
gene1551	up	4.48e-09	1.29474	chorismate synthase [Aspergillus ruber CBS 135680]
gene1815	up	1.16e-11	1.32168	phosphoribosyl AMP cyclohydrolase [Aspergillus fumigatus var. RP-2014]
gene1829	down	3.39e-05	-1.90754	amine oxidase [Microsporum gypseum CBS 118893]
gene2463	up	3.55e-22	1.73095	Argininosuccinate synthase [Penicillium roqueforti FM164]
gene2543	up	1.53e-20	1.79462	aspartate transaminase, putative [Aspergillus fumigatus A1163]
gene2616	up	3.46e-06	1.07868	S-adenosylmethionine synthase [Aspergillus oryzae RIB40]
gene3077	up	3.62e-31	1.97581	5-aminolevulinic acid synthase HemA [Aspergillus clavatus NRRL 1]
gene3365	down	0.00281989	-1.32541	NADP oxidoreductase, coenzyme F420-dependent [Penicillium italicum]
gene3730	up	5.86e-16	1.50262	homocitrate synthase [Aspergillus fumigatus var. RP-2014]
gene4203	down	5.68e-07	-1.35346	amine oxidase [Neosartorya fischeri NRRL 181]
gene4426	up	5.18e-81	3.38055	O-acetylhomoserine [Coccidioides immitis RS]
gene4635	up	2.07e-35	2.14672	Ketol-acid reductoisomerase [Byssochlamys spectabilis No. 5]
gene4723	up	2.04e-12	1.29103	threonine synthase, putative [Byssochlamys spectabilis No. 5]
gene4865	up	2.65e-21	2.14421	phospho-2-dehydro-3-deoxyheptonate aldolase, class II [Aspergillus clavatus NRRL 1]
gene5124	up	1.04e-59	4.72659	bifunctional tryptophan synthase TRPB [Byssochlamys spectabilis No. 5]
gene517	up	1.27e-36	2.75695	Aspartate/other aminotransferase [Penicillium italicum]
gene5452	up	1.54e-15	1.38192	saccharopine dehydrogenase Lys9 [Aspergillus fumigatus Af293]
gene5672	up	1.59e-29	2.59125	l-serine dehydratase [Neosartorya fischeri NRRL 181]
gene5806	up	3.97e-09	1.01162	phosphoglycerate mutase, 2,3-bisphosphoglycerate-independent [Aspergillus fumigatus Af293]
gene5972	down	3.39e-05	-1.01496	cysteine synthase (o-acetylserine (thiol)-lyase) (csase) [Aspergillus kawachii IFO 4308]
gene601	up	8.2e-06	2.96602	phosphoglycerate kinase PgkA [Aspergillus kawachii IFO 4308]
gene6158	up	5.2e-24	1.74708	aspartokinase [Aspergillus ruber CBS 135680]
gene6419	up	0.00289658	2.19716	anthranilate synthase component I, putative [Aspergillus clavatus NRRL 1]
gene6512	up	1.23e-20	2.11535	4-aminobutyrate transaminase GatA [Aspergillus fumigatus Af293]
gene6519	up	1.28e-11	Inf	cystathionine beta-synthase [Coccidioides immitis RS]
gene6768	up	5.94e-08	1.1564	RecName: Full=Glyceraldehyde-3-phosphate dehydrogenase; Short=GAPDH [Monascus purpureus]
gene6811	up	1.45e-12	1.31305	pentafunctional polypeptide (AroM), putative [Neosartorya fischeri NRRL 181]
gene6911	up	2.64e-14	1.29933	glycine dehydrogenase [Aspergillus flavus NRRL3357]
gene6912	up	1.65e-12	1.50904	carbamoyl-phosphate synthase, large subunit [Neosartorya fischeri NRRL 181]
gene6958	down	2.9e-07	-1.00851	delta-1-pyrroline-5-carboxylate dehydrogenase PrnC [Aspergillus fumigatus Af293]
gene7061	up	1.44e-22	1.92057	hypothetical protein PDE_00873 [Penicillium oxalicum 114-2]
gene7344	up	5.94e-10	3.85854	L-asparaginase [Aspergillus kawachii IFO 4308]
gene7484	up	3.34e-28	1.84698	alanine aminotransferase, putative [Neosartorya fischeri NRRL 181]
gene762	up	6.05e-08	1.29289	glutamate synthase Glt1 [Aspergillus fumigatus Af293]
gene7685	down	0.00590063	-1.35379	l-allo-threonine aldolase [Aspergillus clavatus NRRL 1]
gene7778	up	3.83e-37	2.98484	putative anthranilate phosphoribosyltransferase [Aspergillus ruber CBS 135680]
gene7883	up	1.04e-19	1.52399	unnamed protein product [Aspergillus niger]
gene7940	up	1.64e-07	4.07626	hypothetical protein PVAR5_2014 [Byssochlamys spectabilis No. 5]
gene8018	up	1.08e-15	1.48915	2-isopropylmalate synthase [Neosartorya fischeri NRRL 181]
gene828	up	7.45e-37	2.51351	serine hydroxymethyltransferase [Aspergillus terreus NIH2624]
gene901	up	1.94e-19	1.50801	NADP-specific glutamate dehydrogenase [Aspergillus oryzae RIB40]
gene956	up	4.05e-07	1.22621	arginine biosynthesis bifunctional protein ArgJ [Neosartorya fischeri NRRL 181]
gene998	up	1.37e-05	1.0548	Aspartate/ornithine carbamoyltransferase [Penicillium expansum]
Monascus_purpureus_newGene_526	up	2.05e-07	1.04662	saccharopine dehydrogenase [Aspergillus kawachii IFO 4308]

## Sheet: Supplementary Data S6
Supplementary Data S6 Analysis of Transcription Factor Genes with Differential Transcription Levels （P-values < 0.05）
M vs. ML
#ID	regulated	FDR	log2FC	NR_annotation	GO_second_level_annotation	Swiss_Prot_annotation
gene412	up	3.00482e-15	1.47739	aflYd/ sugR/ sugar regulator [Aspergillus flavus NRRL3357]	biological process: biological regulation (GO:0065007);; biological process: metabolic process (GO:0008152);; biological process: cellular process (GO:0009987);; molecular function: binding (GO:0005488)
gene6940	up	0.00174867	2.39239	conserved hypothetical protein [Byssochlamys spectabilis No. 5]	biological process: metabolic process (GO:0008152);; biological process: cellular process (GO:0009987)
gene3196	up	5.70504e-44	3.52423	C6 transcription factor, putative [Neosartorya fischeri NRRL 181]	biological process: metabolic process (GO:0008152);; biological process: cellular process (GO:0009987)
gene5251	down	1.00873e-39	-2.42932	b-zip transcription factor [Aspergillus kawachii IFO 4308]	biological process: biological regulation (GO:0065007);; molecular function: nucleic acid binding transcription factor activity (GO:0001071);; molecular function: binding (GO:0005488)
gene4184	up	3.23304e-42	2.22063	Zn cluster transcription factor [Aspergillus fumigatus Af293]	molecular function: binding (GO:0005488);; biological process: biological regulation (GO:0065007);; molecular function: nucleic acid binding transcription factor activity (GO:0001071);; cellular component: cell (GO:0005623);; cellular component: organelle (GO:0043226);; cellular component: cell part (GO:0044464);; biological process: multi-organism process (GO:0051704);; biological process: singl…
gene3558	up	2.43529e-21	1.7632	C2H2 transcription factor (Seb1), putative, putative [Neosartorya fischeri NRRL 181]	cellular component: cell (GO:0005623);; cellular component: organelle (GO:0043226);; cellular component: cell part (GO:0044464);; biological process: cellular process (GO:0009987);; biological process: response to stimulus (GO:0050896);; biological process: biological regulation (GO:0065007)
gene7815	down	9.89498e-18	-2.28078	hypothetical protein H102_07158 [Trichophyton rubrum CBS 100081]	biological process: metabolic process (GO:0008152);; biological process: cellular process (GO:0009987)
gene220	down	0.00355209	-1.5538	Zn(2)-C6 fungal-type DNA-binding domain [Penicillium roqueforti FM164]	biological process: biological regulation (GO:0065007);; biological process: metabolic process (GO:0008152);; biological process: cellular process (GO:0009987)
gene7306	down	5.60233e-05	-1.91212	bZIP transcription factor (HacA), putative [Aspergillus clavatus NRRL 1]	biological process: biological regulation (GO:0065007);; molecular function: nucleic acid binding transcription factor activity (GO:0001071);; biological process: cellular process (GO:0009987);; biological process: response to stimulus (GO:0050896);; biological process: multi-organism process (GO:0051704);; molecular function: binding (GO:0005488)
gene5850	up	3.77844e-05	1.7311	transcription factor RfeG, putative [Neosartorya fischeri NRRL 181]	--
gene6340	down	5.85191e-52	-8.63784	hypothetical protein ATEG_05233 [Aspergillus terreus NIH2624]	biological process: biological regulation (GO:0065007);; molecular function: nucleic acid binding transcription factor activity (GO:0001071);; molecular function: binding (GO:0005488);; cellular component: cell (GO:0005623);; cellular component: organelle (GO:0043226);; cellular component: cell part (GO:0044464)
gene6903	up	2.53322e-13	1.16946	C6 transcription factor [Aspergillus oryzae 3.042]	biological process: biological regulation (GO:0065007);; biological process: metabolic process (GO:0008152);; biological process: cellular process (GO:0009987);; molecular function: binding (GO:0005488)
gene4488	up	2.86429e-10	1.64716	fungal specific transcription factor domain protein [Aspergillus clavatus NRRL 1]	biological process: biological regulation (GO:0065007);; molecular function: nucleic acid binding transcription factor activity (GO:0001071);; molecular function: binding (GO:0005488);; cellular component: cell (GO:0005623);; cellular component: organelle (GO:0043226);; cellular component: cell part (GO:0044464);; biological process: metabolic process (GO:0008152);; molecular function: catalytic …
gene7727	down	4.02583e-06	-1.71792	fungal specific transcription factor domain-containing protein [Microsporum gypseum CBS 118893]	biological process: metabolic process (GO:0008152);; biological process: cellular process (GO:0009987)
gene791	up	7.86663e-14	1.99977	regulatory protein [Aspergillus niger ATCC 1015]	biological process: biological regulation (GO:0065007);; molecular function: nucleic acid binding transcription factor activity (GO:0001071);; molecular function: binding (GO:0005488);; cellular component: cell (GO:0005623);; cellular component: organelle (GO:0043226);; cellular component: cell part (GO:0044464)
gene6986	up	1.37607e-06	1.1444	hypothetical protein NECHADRAFT_101171 [Byssochlamys spectabilis No. 5]	--
gene283	down	2.33747e-09	-1.17824	citrinin biosynthesis transcriptional activator CtnR [Monascus purpureus]	--
gene1163	up	0.000662352	1.32884	putative C6 transcription factor [Aspergillus ruber CBS 135680]	biological process: biological regulation (GO:0065007);; biological process: metabolic process (GO:0008152);; biological process: cellular process (GO:0009987);; molecular function: binding (GO:0005488)	Nitrogen assimilation transcription factor nit-4 GN=nit-4 OS=Neurospora crassa (strain ATCC 24698 / 74-OR23-1A / CBS 708.71 / DSM PE=3 SV=2
gene5390	down	0.00897787	-1.59583	hypothetical protein OIDMADRAFT_66882, partial [Oidiodendron maius Zn]	--
gene4443	down	0.00607839	-1.14123	TPA: Similar to ammonium permease, but not normally active (Eurofung) [Aspergillus nidulans FGSC A4]	biological process: biological regulation (GO:0065007);; molecular function: nucleic acid binding transcription factor activity (GO:0001071);; cellular component: cell (GO:0005623);; cellular component: organelle (GO:0043226);; cellular component: cell part (GO:0044464);; molecular function: binding (GO:0005488);; biological process: cellular process (GO:0009987);; biological process: single-orga…
gene5340	down	0.000111212	-4.64672	RNA polymerase II Elongator subunit [Aspergillus kawachii IFO 4308]	biological process: biological regulation (GO:0065007);; molecular function: nucleic acid binding transcription factor activity (GO:0001071);; biological process: metabolic process (GO:0008152);; biological process: cellular process (GO:0009987);; molecular function: catalytic activity (GO:0003824);; molecular function: binding (GO:0005488);; biological process: single-organism process (GO:004469…
gene1111	down	2.80653e-20	-2.143	C6 finger domain protein, putative [Neosartorya fischeri NRRL 181]	--
gene2068	down	5.24616e-06	-2.20465	bZIP transcription factor [Aspergillus niger CBS 513.88]	molecular function: binding (GO:0005488)
gene48	down	1.76073e-07	-3.99433	hypothetical protein CIMG_02826 [Coccidioides immitis RS]	biological process: metabolic process (GO:0008152);; biological process: cellular process (GO:0009987)
gene5724	up	2.3728e-38	2.0673	C2H2 transcription factor (Rpn4), putative [Aspergillus clavatus NRRL 1]	--
gene184	down	3.31494e-10	-2.18121	Pc13g01390 [Penicillium rubens Wisconsin 54-1255]	--
gene7479	up	1.46911e-09	1.05264	C2H2 transcription factor [Aspergillus kawachii IFO 4308]	molecular function: binding (GO:0005488)
gene2156	up	3.15422e-05	1.23043	predicted protein [Aspergillus terreus NIH2624]	--
gene1007	up	1.22833e-16	1.57542	C6 transcription factor, putative [Neosartorya fischeri NRRL 181]	biological process: biological regulation (GO:0065007);; molecular function: binding (GO:0005488)
gene6613	down	1.70902e-07	-2.23268	AflR-like C6 transcription factor [Aspergillus fumigatus Af293]	biological process: metabolic process (GO:0008152);; biological process: cellular process (GO:0009987)
gene1612	down	1.43421e-08	-1.14852	copper amine oxidase 1 [Aspergillus niger CBS 513.88]	molecular function: binding (GO:0005488);; biological process: metabolic process (GO:0008152);; biological process: single-organism process (GO:0044699);; molecular function: catalytic activity (GO:0003824);; cellular component: cell (GO:0005623);; cellular component: cell part (GO:0044464)
gene7615	up	1.91854e-40	2.12388	transcriptional elongation factor Iws1 [Aspergillus fumigatus Af293]	molecular function: binding (GO:0005488);; biological process: metabolic process (GO:0008152);; biological process: cellular process (GO:0009987);; cellular component: cell (GO:0005623);; cellular component: organelle (GO:0043226);; cellular component: cell part (GO:0044464);; biological process: biological regulation (GO:0065007)
gene1114	down	6.34295e-07	-1.20404	TPA: Similar to ammonium permease, but not normally active (Eurofung) [Aspergillus nidulans FGSC A4]	biological process: biological regulation (GO:0065007);; molecular function: nucleic acid binding transcription factor activity (GO:0001071);; cellular component: cell (GO:0005623);; cellular component: organelle (GO:0043226);; cellular component: cell part (GO:0044464);; molecular function: binding (GO:0005488);; biological process: cellular process (GO:0009987);; biological process: single-orga…
gene7035	down	4.28634e-16	-2.29294	hypothetical protein EURHEDRAFT_468215 [Aspergillus ruber CBS 135680]	biological process: biological regulation (GO:0065007);; molecular function: nucleic acid binding transcription factor activity (GO:0001071);; biological process: metabolic process (GO:0008152);; biological process: cellular process (GO:0009987)
gene583	up	0.00805529	1.13479	hypothetical protein AOR_1_1476164 [Aspergillus oryzae RIB40]	molecular function: binding (GO:0005488);; biological process: metabolic process (GO:0008152);; biological process: cellular process (GO:0009987)
M vs. MX
#ID	regulated	FDR	log2FC	NR_annotation	GO_second_level_annotation	Swiss_Prot_annotation
gene7268	up	0.0001843	1.06804	C6 transcription factor, putative [Neosartorya fischeri NRRL 181]	biological process: biological regulation (GO:0065007);; biological process: metabolic process (GO:0008152);; biological process: cellular process (GO:0009987);; molecular function: binding (GO:0005488)
gene2534	up	6.04914e-09	1.35694	transcription factor GATA AreA [Aspergillus fumigatus var. RP-2014]	biological process: biological regulation (GO:0065007);; molecular function: nucleic acid binding transcription factor activity (GO:0001071);; molecular function: binding (GO:0005488);; cellular component: cell (GO:0005623);; cellular component: organelle (GO:0043226);; cellular component: cell part (GO:0044464);; biological process: cellular process (GO:0009987);; biological process: cellular co…	Nitrogen regulatory protein areA GN=areA OS=Aspergillus oryzae (strain ATCC 42149 / RIB 40) PE=3 SV=1
gene6838	up	2.32938e-10	1.5203	NDT80 / PhoG like DNA-binding family protein [Aspergillus oryzae RIB40]	--
gene8066	down	1.39524e-06	-2.17815	hypothetical protein EURHEDRAFT_468215 [Aspergillus ruber CBS 135680]	biological process: biological regulation (GO:0065007);; molecular function: nucleic acid binding transcription factor activity (GO:0001071);; biological process: metabolic process (GO:0008152);; biological process: cellular process (GO:0009987)
gene1146	up	7.71325e-06	1.06797	transcription factor fungal specific [Aspergillus fumigatus var. RP-2014]	biological process: biological regulation (GO:0065007);; biological process: metabolic process (GO:0008152);; biological process: cellular process (GO:0009987);; molecular function: binding (GO:0005488)
gene2694	up	0.00540769	1.01435	fungal-specific transcription factor domain protein [Aspergillus ruber CBS 135680]	biological process: biological regulation (GO:0065007);; molecular function: nucleic acid binding transcription factor activity (GO:0001071);; molecular function: binding (GO:0005488);; molecular function: catalytic activity (GO:0003824);; cellular component: cell (GO:0005623);; cellular component: organelle (GO:0043226);; cellular component: cell part (GO:0044464)
gene3196	up	4.32028e-29	3.05288	C6 transcription factor, putative [Neosartorya fischeri NRRL 181]	biological process: metabolic process (GO:0008152);; biological process: cellular process (GO:0009987)
gene5251	down	3.28992e-45	-2.70739	b-zip transcription factor [Aspergillus kawachii IFO 4308]	biological process: biological regulation (GO:0065007);; molecular function: nucleic acid binding transcription factor activity (GO:0001071);; molecular function: binding (GO:0005488)
gene7121	up	1.69788e-05	1.04635	C6 zinc finger domain protein [Aspergillus oryzae RIB40]	biological process: metabolic process (GO:0008152);; biological process: cellular process (GO:0009987);; molecular function: binding (GO:0005488)
gene4184	up	2.85617e-54	2.65741	Zn cluster transcription factor [Aspergillus fumigatus Af293]	molecular function: binding (GO:0005488);; biological process: biological regulation (GO:0065007);; molecular function: nucleic acid binding transcription factor activity (GO:0001071);; cellular component: cell (GO:0005623);; cellular component: organelle (GO:0043226);; cellular component: cell part (GO:0044464);; biological process: multi-organism process (GO:0051704);; biological process: singl…
gene3558	up	8.13419e-10	1.3613	C2H2 transcription factor (Seb1), putative, putative [Neosartorya fischeri NRRL 181]	cellular component: cell (GO:0005623);; cellular component: organelle (GO:0043226);; cellular component: cell part (GO:0044464);; biological process: cellular process (GO:0009987);; biological process: response to stimulus (GO:0050896);; biological process: biological regulation (GO:0065007)
gene220	down	1.56579e-05	-2.24428	Zn(2)-C6 fungal-type DNA-binding domain [Penicillium roqueforti FM164]	biological process: biological regulation (GO:0065007);; biological process: metabolic process (GO:0008152);; biological process: cellular process (GO:0009987)
gene5850	up	2.84408e-11	1.30082	transcription factor RfeG, putative [Neosartorya fischeri NRRL 181]	--
gene6903	up	2.66213e-34	2.20241	C6 transcription factor [Aspergillus oryzae 3.042]	biological process: biological regulation (GO:0065007);; biological process: metabolic process (GO:0008152);; biological process: cellular process (GO:0009987);; molecular function: binding (GO:0005488)
gene4488	up	9.23568e-10	1.39723	fungal specific transcription factor domain protein [Aspergillus clavatus NRRL 1]	biological process: biological regulation (GO:0065007);; molecular function: nucleic acid binding transcription factor activity (GO:0001071);; molecular function: binding (GO:0005488);; cellular component: cell (GO:0005623);; cellular component: organelle (GO:0043226);; cellular component: cell part (GO:0044464);; biological process: metabolic process (GO:0008152);; molecular function: catalytic …
gene7727	down	0.00184317	-1.13499	fungal specific transcription factor domain-containing protein [Microsporum gypseum CBS 118893]	biological process: metabolic process (GO:0008152);; biological process: cellular process (GO:0009987)
gene3049	up	2.66711e-09	1.25841	zinc knuckle transcription factor (CnjB) [Aspergillus oryzae RIB40]	--
gene791	up	6.97943e-27	2.59818	regulatory protein [Aspergillus niger ATCC 1015]	biological process: biological regulation (GO:0065007);; molecular function: nucleic acid binding transcription factor activity (GO:0001071);; molecular function: binding (GO:0005488);; cellular component: cell (GO:0005623);; cellular component: organelle (GO:0043226);; cellular component: cell part (GO:0044464)
gene788	up	2.28518e-09	1.14279	hypothetical protein ASPNIDRAFT_214402 [Aspergillus niger ATCC 1015]	--
gene6675	up	1.046e-07	1.0478	CCAAT-binding transcription factor subunit HAPB [Neosartorya fischeri NRRL 181]	biological process: biological regulation (GO:0065007);; molecular function: nucleic acid binding transcription factor activity (GO:0001071);; biological process: metabolic process (GO:0008152);; biological process: cellular process (GO:0009987);; biological process: cellular component organization or biogenesis (GO:0071840);; cellular component: cell (GO:0005623);; cellular component: macromolec…
gene7793	up	3.4074e-13	1.4216	hypothetical protein EURHEDRAFT_512345 [Aspergillus ruber CBS 135680]	biological process: biological regulation (GO:0065007);; molecular function: nucleic acid binding transcription factor activity (GO:0001071);; molecular function: binding (GO:0005488)
gene283	down	1.07075e-13	-1.50468	citrinin biosynthesis transcriptional activator CtnR [Monascus purpureus]	--
gene1163	up	0.00685528	1.10186	putative C6 transcription factor [Aspergillus ruber CBS 135680]	biological process: biological regulation (GO:0065007);; biological process: metabolic process (GO:0008152);; biological process: cellular process (GO:0009987);; molecular function: binding (GO:0005488)	Nitrogen assimilation transcription factor nit-4 GN=nit-4 OS=Neurospora crassa (strain ATCC 24698 / 74-OR23-1A / CBS 708.71 / DSM PE=3 SV=2
gene5851	up	5.06668e-11	1.17244	C6 transcription factor (Ctf1B) [Aspergillus niger CBS 513.88]	biological process: biological regulation (GO:0065007);; molecular function: nucleic acid binding transcription factor activity (GO:0001071);; molecular function: binding (GO:0005488);; cellular component: cell (GO:0005623);; cellular component: organelle (GO:0043226);; cellular component: cell part (GO:0044464)
gene5390	down	0.00528249	-2.98	hypothetical protein OIDMADRAFT_66882, partial [Oidiodendron maius Zn]	--
gene4443	down	0.000112147	-1.52103	TPA: Similar to ammonium permease, but not normally active (Eurofung) [Aspergillus nidulans FGSC A4]	biological process: biological regulation (GO:0065007);; molecular function: nucleic acid binding transcription factor activity (GO:0001071);; cellular component: cell (GO:0005623);; cellular component: organelle (GO:0043226);; cellular component: cell part (GO:0044464);; molecular function: binding (GO:0005488);; biological process: cellular process (GO:0009987);; biological process: single-orga…
gene3178	down	1.94852e-05	-1.04161	mitochondrial 54S ribosomal protein YmL31 [Aspergillus clavatus NRRL 1]	biological process: biological regulation (GO:0065007);; molecular function: nucleic acid binding transcription factor activity (GO:0001071);; molecular function: structural molecule activity (GO:0005198);; cellular component: cell (GO:0005623);; cellular component: organelle (GO:0043226);; cellular component: cell part (GO:0044464);; cellular component: macromolecular complex (GO:0032991);; cell…
gene5340	down	0.000169582	-4.2981	RNA polymerase II Elongator subunit [Aspergillus kawachii IFO 4308]	biological process: biological regulation (GO:0065007);; molecular function: nucleic acid binding transcription factor activity (GO:0001071);; biological process: metabolic process (GO:0008152);; biological process: cellular process (GO:0009987);; molecular function: catalytic activity (GO:0003824);; molecular function: binding (GO:0005488);; biological process: single-organism process (GO:004469…
gene1111	down	5.42656e-28	-2.62879	C6 finger domain protein, putative [Neosartorya fischeri NRRL 181]	--
gene48	down	0.000268396	-2.51403	hypothetical protein CIMG_02826 [Coccidioides immitis RS]	biological process: metabolic process (GO:0008152);; biological process: cellular process (GO:0009987)
gene6951	up	3.2714e-08	1.6009	hypothetical protein S40288_03850 [Stachybotrys chartarum IBT 40288]	molecular function: binding (GO:0005488);; biological process: metabolic process (GO:0008152);; biological process: cellular process (GO:0009987)
gene5724	up	6.44741e-44	2.94618	C2H2 transcription factor (Rpn4), putative [Aspergillus clavatus NRRL 1]	--
gene260	up	1.5798e-20	1.66994	related to D-amino acid oxidase [Fusarium fujikuroi IMI 58289]	biological process: metabolic process (GO:0008152);; molecular function: catalytic activity (GO:0003824)
gene6670	up	5.0024e-27	1.80478	acetate regulatory DNA binding protein FacB [Aspergillus oryzae RIB40]	biological process: biological regulation (GO:0065007);; molecular function: nucleic acid binding transcription factor activity (GO:0001071);; cellular component: cell (GO:0005623);; cellular component: organelle (GO:0043226);; cellular component: cell part (GO:0044464);; biological process: single-organism process (GO:0044699);; molecular function: binding (GO:0005488);; biological process: meta…
gene184	down	1.03497e-06	-1.66596	Pc13g01390 [Penicillium rubens Wisconsin 54-1255]	--
gene7479	up	3.05628e-24	1.72261	C2H2 transcription factor [Aspergillus kawachii IFO 4308]	molecular function: binding (GO:0005488)
gene6659	up	5.80452e-65	3.885	CobW domain-containing protein [Coccidioides immitis RS]	biological process: biological regulation (GO:0065007);; molecular function: nucleic acid binding transcription factor activity (GO:0001071);; molecular function: binding (GO:0005488);; biological process: cellular process (GO:0009987);; biological process: single-organism process (GO:0044699);; biological process: localization (GO:0051179);; molecular function: transporter activity (GO:0005215);…
gene2156	up	1.31025e-23	2.3664	predicted protein [Aspergillus terreus NIH2624]	--
gene7615	up	2.06789e-36	2.12799	transcriptional elongation factor Iws1 [Aspergillus fumigatus Af293]	molecular function: binding (GO:0005488);; biological process: metabolic process (GO:0008152);; biological process: cellular process (GO:0009987);; cellular component: cell (GO:0005623);; cellular component: organelle (GO:0043226);; cellular component: cell part (GO:0044464);; biological process: biological regulation (GO:0065007)
gene1114	down	2.7755e-13	-1.72925	TPA: Similar to ammonium permease, but not normally active (Eurofung) [Aspergillus nidulans FGSC A4]	biological process: biological regulation (GO:0065007);; molecular function: nucleic acid binding transcription factor activity (GO:0001071);; cellular component: cell (GO:0005623);; cellular component: organelle (GO:0043226);; cellular component: cell part (GO:0044464);; molecular function: binding (GO:0005488);; biological process: cellular process (GO:0009987);; biological process: single-orga…
gene5945	up	3.6137e-16	3.60654	predicted protein [Aspergillus terreus NIH2624]	biological process: biological regulation (GO:0065007);; molecular function: nucleic acid binding transcription factor activity (GO:0001071);; cellular component: cell (GO:0005623);; cellular component: organelle (GO:0043226);; cellular component: cell part (GO:0044464);; molecular function: binding (GO:0005488)
gene7035	down	5.41243e-12	-1.85598	hypothetical protein EURHEDRAFT_468215 [Aspergillus ruber CBS 135680]	biological process: biological regulation (GO:0065007);; molecular function: nucleic acid binding transcription factor activity (GO:0001071);; biological process: metabolic process (GO:0008152);; biological process: cellular process (GO:0009987)
gene8049	up	0.000282101	1.07793	unnamed protein product [Aspergillus oryzae RIB40]	biological process: metabolic process (GO:0008152);; biological process: cellular process (GO:0009987)
gene583	up	0.00809071	1.11822	hypothetical protein AOR_1_1476164 [Aspergillus oryzae RIB40]	molecular function: binding (GO:0005488);; biological process: metabolic process (GO:0008152);; biological process: cellular process (GO:0009987)
gene6103	up	1.29851e-38	2.29222	HLH DNA binding domain protein, putative [Aspergillus flavus NRRL3357]	cellular component: cell (GO:0005623);; cellular component: organelle (GO:0043226);; cellular component: cell part (GO:0044464)
gene4230	up	0.0093865	9.06997	predicted protein [Trichoderma reesei QM6a]	--
gene621	up	1.06354e-09	1.43271	conserved hypothetical protein [Byssochlamys spectabilis No. 5]	cellular component: cell (GO:0005623);; cellular component: organelle (GO:0043226);; cellular component: cell part (GO:0044464);; biological process: metabolic process (GO:0008152);; biological process: cellular process (GO:0009987);; molecular function: catalytic activity (GO:0003824);; molecular function: binding (GO:0005488)
gene465	down	1.57111e-05	-1.00324	transcription factor (SPT8), putative [Aspergillus flavus NRRL3357]	--

## Sheet: Supplementary Data S7
Supplementary Data S7 Analysis of Monascus_purpureus_newGene
#GeneID	COG_class	COG_class_annotation	GO_annotation	KEGG_annotation	KEGG_pathway_annotation	KOG_class	KOG_class_annotation	Pfam_annotation	Swissprot_annotation	eggNOG_class	eggNOG_class_annotation	nr_annotation
1165	--	--	--	--	--	--	--	--	--	S	Function unknown	predicted protein [Uncinocarpus reesii 1704]
1073	--	--	--	--	--	--	--	--	--	S	Function unknown	conserved hypothetical protein [Talaromyces marneffei ATCC 18224]
1234	--	--	--	--	--	--	--	--	--	S	Function unknown	hypothetical protein MGYG_04964 [Microsporum gypseum CBS 118893]
1303	--	--	--	--	--	--	--	Condensation domain	--	I	Lipid transport and metabolism	hypothetical protein K443DRAFT_100261 [Laccaria amethystina LaAM-08-1]
275	--	--	--	--	--	--	--	--	--	R	General function prediction only	hypothetical protein SPBR_05564 [Sporothrix brasiliensis 5110]
366	--	--	--	--	--	--	--	--	--	R	General function prediction only	hypothetical protein AFUA_7G08370 [Aspergillus fumigatus Af293]
1283	--	--	--	--	--	--	--	--	Protein kish (Precursor) GN=KSH1 OS=Saccharomyces cerevisiae (strain ATCC 204508 / S288c) PE=3 SV=1	S	Function unknown	putative S-adenosylmethionine-dependent methyltransferase [Aspergillus ruber CBS 135680]
454	--	--	--	--	--	--	--	--	--	S	Function unknown	conserved hypothetical protein [Talaromyces stipitatus ATCC 10500]
1110	[L]	Replication, recombination and repair	Biological Process: DNA metabolic process (GO:0006259);;	--	--	--	--	DDE superfamily endonuclease	--	S	Function unknown	unnamed protein product [Aspergillus niger]
257	[J]	Translation, ribosomal structure and biogenesis	Molecular Function: RNA binding (GO:0003723);; Molecular Function: structural constituent of ribosome (GO:0003735);; Biological Process: translation (GO:0006412);; Cellular Component: small ribosomal subunit (GO:0015935);;	K02980|1.85466e-15|act:ACLA_085970|40S ribosomal protein S29; K02980 small subunit ribosomal protein S29e (A)	../inputs/Monascus_purpureus.newGene.longest_transcript.fa.Kegg.pathway	[J]	Translation, ribosomal structure and biogenesis	Ribosomal protein S14p/S29e	40S ribosomal protein S29 GN=rps-29 OS=Neurospora crassa (strain ATCC 24698 / 74-OR23-1A / CBS 708.71 / DSM PE=3 SV=1	J	Translation, ribosomal structure and biogenesis	ribosomal protein S14, partial [Aspergillus ruber CBS 135680]
490	--	--	--	--	--	--	--	--	--	R	General function prediction only	hypothetical protein CIMG_09328 [Coccidioides immitis RS]
572	--	--	Molecular Function: DNA binding (GO:0003677);; Molecular Function: zinc ion binding (GO:0008270);;	--	--	--	--	--	--	S	Function unknown	hypothetical protein TSTA_126030 [Talaromyces stipitatus ATCC 10500]
1204	--	--	--	--	--	--	--	Cupin-like domain	--	S	Function unknown	unnamed protein product [Aspergillus oryzae RIB40]
141	--	--	Molecular Function: motor activity (GO:0003774);; Cellular Component: nuclear pore (GO:0005643);; Cellular Component: peroxisome (GO:0005777);; Cellular Component: cytoplasmic dynein complex (GO:0005868);; Cellular Component: microtubule (GO:0005874);; Biological Process: actin filament-based process (GO:0030029);; Biological Process: nuclear migration along microtubule (GO:0030473);; Biological …	K10418|1.17715e-56|ang:ANI_1_500014|An01g03770; dynein light chain DYN2; K10418 dynein light chain LC8-type (A)	--	[Z]	Cytoskeleton	Dynein light chain type 1	Dynein light chain, cytoplasmic GN=nudG OS=Emericella nidulans (strain FGSC A4 / ATCC 38163 / CBS 112.46 / NRRL PE=3 SV=1	Z	Cytoskeleton	dynein light chain type 1 [Byssochlamys spectabilis No. 5]
554	--	--	--	--	--	--	--	--	--	S	Function unknown	conserved hypothetical protein [Talaromyces stipitatus ATCC 10500]
335	--	--	Molecular Function: transferase activity (GO:0016740);;	--	--	--	--	--	--	R	General function prediction only	phosphoethanolamine N-methyltransferase, putative [Talaromyces stipitatus ATCC 10500]
292	--	--	--	--	--	--	--	--	--	R	General function prediction only	predicted protein [Aspergillus terreus NIH2624]
740	--	--	--	--	--	--	--	--	--	S	Function unknown	TPA: conserved hypothetical protein [Aspergillus nidulans FGSC A4]
897	--	--	Molecular Function: nucleic acid binding (GO:0003676);;	--	--	--	--	helix-turn-helix, Psq domain	--	S	Function unknown	transposase [Aspergillus fumigatus]
86	--	--	Molecular Function: transferase activity, transferring phosphorus-containing groups (GO:0016772);;	--	--	--	--	Protein of unknown function (DUF3716)	--	S	Function unknown	unnamed protein product [Aspergillus oryzae RIB40]
1305	--	--	Molecular Function: transferase activity, transferring phosphorus-containing groups (GO:0016772);;	--	--	--	--	--	--	S	Function unknown	hypothetical protein PDE_02539 [Penicillium oxalicum 114-2]
232	--	--	--	--	--	--	--	hAT family C-terminal dimerisation region	--	S	Function unknown	conserved hypothetical protein [Talaromyces stipitatus ATCC 10500]
1004	--	--	Molecular Function: transferase activity, transferring phosphorus-containing groups (GO:0016772);;	--	--	--	--	--	--	T	Signal transduction mechanisms	hypothetical protein AOR_1_296064 [Aspergillus oryzae RIB40]
21	--	--	Molecular Function: transferase activity, transferring phosphorus-containing groups (GO:0016772);;	--	--	--	--	Phosphotransferase enzyme family	--	R	General function prediction only	Pc13g07950 [Penicillium rubens Wisconsin 54-1255]
100	[V]	Defense mechanisms	Molecular Function: ATP binding (GO:0005524);; Biological Process: ATP catabolic process (GO:0006200);; Cellular Component: integral component of membrane (GO:0016021);; Molecular Function: 2-alkenal reductase [NAD(P)] activity (GO:0032440);; Molecular Function: ATPase activity, coupled to transmembrane movement of substances (GO:0042626);; Biological Process: transmembrane transport (GO:0055085)…	--	--	[Q]	Secondary metabolites biosynthesis, transport and catabolism	ABC transporter	Oligomycin resistance ATP-dependent permease YOR1 GN=YOR1 OS=Saccharomyces cerevisiae (strain ATCC 204508 / S288c) PE=1 SV=1	V	Defense mechanisms	ABC transporter, putative [Aspergillus clavatus NRRL 1]
354	--	--	Molecular Function: binding (GO:0005488);;	--	--	--	--	--	--	B	Chromatin structure and dynamics	conserved hypothetical protein [Talaromyces stipitatus ATCC 10500]
882	[FJ]	Nucleotide transport and metabolism;; Translation, ribosomal structure and biogenesis	Biological Process: metabolic process (GO:0008152);; Molecular Function: zinc ion binding (GO:0008270);; Molecular Function: hydrolase activity (GO:0016787);;	K15441|3.39438e-73|aor:AOR_1_16044|AO090206000009; cytidine and deoxycytidylate deaminase zinc-binding domain protein; K15441 tRNA-specific adenosine deaminase 2 [EC:3.5.4.-] (A)	--	[F]	Nucleotide transport and metabolism	Cytidine and deoxycytidylate deaminase zinc-binding region	tRNA-specific adenosine deaminase subunit tad2 OS=Schizosaccharomyces pombe (strain 972 / ATCC 24843) PE=3 SV=2	F	Nucleotide transport and metabolism	cytosine deaminase, putative [Aspergillus flavus NRRL3357]
713	--	--	Molecular Function: hydrolase activity (GO:0016787);;	--	--	--	--	Calcineurin-like phosphoesterase	--	R	General function prediction only	calcineurin-like phosphoesterase [Aspergillus kawachii IFO 4308]
147	--	--	--	--	--	--	--	Protein of unknown function (DUF3435)	--	S	Function unknown	hypothetical protein AKAW_11007 [Aspergillus kawachii IFO 4308]
1055	--	--	--	--	--	--	--	LITAF-like zinc ribbon domain	--	S	Function unknown	hypothetical protein CFIO01_11798 [Colletotrichum fioriniae PJ7]
800	--	--	Molecular Function: protein kinase activity (GO:0004672);; Molecular Function: ATP binding (GO:0005524);; Biological Process: protein phosphorylation (GO:0006468);;	--	--	--	--	--	--	R	General function prediction only	Phosphotransferase family protein [Coccidioides posadasii C735 delta SOWgp]
956	--	--	Cellular Component: mitochondrial outer membrane translocase complex (GO:0005742);; Biological Process: protein import into mitochondrial matrix (GO:0030150);;	K17771|1.46136e-12|aor:AOR_1_34114|TOM complex component Tom7; K17771 mitochondrial import receptor subunit TOM7 (A)	--	--	--	TOM7 family	--	S	Function unknown	TOM complex component Tom7 [Aspergillus niger CBS 513.88]
945	--	--	Molecular Function: DNA binding (GO:0003677);; Molecular Function: oxidoreductase activity, acting on the CH-OH group of donors, NAD or NADP as acceptor (GO:0016616);; Biological Process: single-organism metabolic process (GO:0044710);; Molecular Function: coenzyme binding (GO:0050662);;	--	--	--	--	--	--	S	Function unknown	hypothetical protein AFUA_4G08640 [Aspergillus fumigatus Af293]
519	--	--	--	--	--	--	--	--	--	Z	Cytoskeleton	TPR repeat protein [Talaromyces cellulolyticus]
33	[GEPR]	Carbohydrate transport and metabolism;; Amino acid transport and metabolism;; Inorganic ion transport and metabolism;; General function prediction only	Cellular Component: integral component of membrane (GO:0016021);; Biological Process: transmembrane transport (GO:0055085);;	--	--	--	--	--	Uncharacterized transporter C1039.04 GN=SPAC1039.04 OS=Schizosaccharomyces pombe (strain 972 / ATCC 24843) PE=3 SV=1	G	Carbohydrate transport and metabolism	hypothetical protein SNOG_13490 [Byssochlamys spectabilis No. 5]
31	--	--	--	--	--	--	--	--	--	L	Replication, recombination and repair	predicted protein [Aspergillus terreus NIH2624]
626	[E]	Amino acid transport and metabolism	Biological Process: alcohol metabolic process (GO:0006066);; Molecular Function: choline dehydrogenase activity (GO:0008812);; Molecular Function: glucose oxidase activity (GO:0046562);; Molecular Function: flavin adenine dinucleotide binding (GO:0050660);; Biological Process: oxidation-reduction process (GO:0055114);;	--	--	--	--	GMC oxidoreductase;; NAD(P)-binding Rossmann-like domain	Glucose oxidase (Precursor) GN=gox OS=Aspergillus niger PE=1 SV=1	R	General function prediction only	glucose oxidase [Aspergillus niger CBS 513.88]
663	--	--	Molecular Function: transferase activity (GO:0016740);; Molecular Function: hydrolase activity (GO:0016787);;	K08657|3.15972e-28|aor:AOR_1_1204014|AO090026000671; asparginase; K08657 taspase, threonine aspartase, 1 [EC:3.4.25.-] (A)	--	--	--	--	--	E	Amino acid transport and metabolism	asparginase [Aspergillus oryzae RIB40]
468	--	--	Molecular Function: DNA binding (GO:0003677);; Molecular Function: zinc ion binding (GO:0008270);;	--	--	--	--	DDE superfamily endonuclease	--	S	Function unknown	transposase [Aspergillus fumigatus]
941	--	--	Biological Process: alcohol metabolic process (GO:0006066);; Molecular Function: choline dehydrogenase activity (GO:0008812);; Molecular Function: aryl-alcohol oxidase activity (GO:0047682);; Molecular Function: flavin adenine dinucleotide binding (GO:0050660);; Biological Process: oxidation-reduction process (GO:0055114);;	--	--	--	--	GMC oxidoreductase	--	E	Amino acid transport and metabolism	CtnD [Monascus aurantiacus]
654	[K]	Transcription	Molecular Function: nucleic acid binding (GO:0003676);; Cellular Component: ribonucleoprotein complex (GO:0030529);;	K12624|3.35694e-46|act:ACLA_005980|small nuclear ribonucleoprotein (LSM5), putative; K12624 U6 snRNA-associated Sm-like protein LSm5 (A)	../inputs/Monascus_purpureus.newGene.longest_transcript.fa.Kegg.pathway	[A]	RNA processing and modification	LSM domain	U6 snRNA-associated Sm-like protein LSm5 GN=lsm5 OS=Schizosaccharomyces pombe (strain 972 / ATCC 24843) PE=1 SV=2	A	RNA processing and modification	small nuclear ribonucleoprotein (LSM5), putative [Aspergillus clavatus NRRL 1]
1227	[Q]	Secondary metabolites biosynthesis, transport and catabolism	Molecular Function: transferase activity, transferring acyl groups other than amino-acyl groups (GO:0016747);; Biological Process: secondary metabolic process (GO:0019748);;	--	--	--	--	Zinc-binding dehydrogenase;; Zinc-binding dehydrogenase;; Alcohol dehydrogenase GroES-like domain;; KR domain;; short chain dehydrogenase	Lovastatin diketide synthase LovF GN=lovF OS=Aspergillus terreus PE=1 SV=1	I	Lipid transport and metabolism	Pc21g04840 [Penicillium rubens Wisconsin 54-1255]
59	--	--	Molecular Function: translation initiation factor activity (GO:0003743);; Biological Process: translational initiation (GO:0006413);;	K03238|7.6645e-20|ang:ANI_1_1704024|An02g12320; eukaryotic translation initiation factor 2 subunit beta; K03238 translation initiation factor 2 subunit 2 (A)	../inputs/Monascus_purpureus.newGene.longest_transcript.fa.Kegg.pathway	--	--	--	--	J	Translation, ribosomal structure and biogenesis	eukaryotic translation initiation factor 2 subunit beta [Aspergillus niger CBS 513.88]
361	--	--	Cellular Component: mitochondrial proton-transporting ATP synthase complex, catalytic core F(1) (GO:0000275);; Biological Process: ATP synthesis coupled proton transport (GO:0015986);; Molecular Function: metal ion binding (GO:0046872);; Molecular Function: proton-transporting ATP synthase activity, rotational mechanism (GO:0046933);; Molecular Function: proton-transporting ATPase activity, rotat…	K02135|6.75427e-11|act:ACLA_081100|Mitochondrial ATP synthase epsilon chain domain-containing protein; K02135 F-type H+-transporting ATPase subunit epsilon (A)	../inputs/Monascus_purpureus.newGene.longest_transcript.fa.Kegg.pathway	--	--	Mitochondrial ATP synthase epsilon chain	--	C	Energy production and conversion	F-type H+-transporting ATPase subunit epsilon [Capronia coronata CBS 617.96]
82	--	--	Molecular Function: transferase activity (GO:0016740);;	--	--	--	--	--	--	S	Function unknown	predicted protein [Histoplasma capsulatum NAm1]
476	--	--	--	--	--	--	--	--	--	--	--	telomere-associated RecQ helicase [Aspergillus fumigatus Af293]
130	--	--	--	--	--	--	--	--	--	S	Function unknown	putative mating locus protein [Aspergillus ruber CBS 135680]
1117	--	--	--	--	--	--	--	--	--	--	--	hypothetical protein TSTA_020850 [Talaromyces stipitatus ATCC 10500]
1103	--	--	Molecular Function: DNA binding (GO:0003677);; Molecular Function: zinc ion binding (GO:0008270);;	--	--	--	--	--	--	S	Function unknown	conserved hypothetical protein [Aspergillus terreus NIH2624]
852	--	--	--	--	--	--	--	--	--	R	General function prediction only	hypothetical protein AOL_s00043g512 [Arthrobotrys oligospora ATCC 24927]
879	--	--	--	--	--	--	--	--	--	S	Function unknown	conserved hypothetical protein [Aspergillus clavatus NRRL 1]
847	--	--	--	--	--	--	--	--	--	S	Function unknown	conserved hypothetical protein [Aspergillus flavus NRRL3357]
1139	--	--	--	--	--	--	--	--	--	S	Function unknown	hypothetical protein AOR_1_884024 [Aspergillus oryzae RIB40]
1088	--	--	Molecular Function: DNA binding (GO:0003677);;	--	--	--	--	--	--	S	Function unknown	putative Tc1-mariner class transposase [Aspergillus niger]
54	--	--	--	--	--	--	--	--	--	--	--	hypothetical protein EURHEDRAFT_382268 [Aspergillus ruber CBS 135680]
507	--	--	--	K17784|1.20174e-32|act:ACLA_022260|DUF543 domain protein; K17784 mitochondrial inner membrane organizing system protein 1 (A)	--	[S]	Function unknown	Domain of unknown function (DUF543)	MICOS complex subunit mic10 GN=mic10 OS=Neurospora crassa (strain ATCC 24698 / 74-OR23-1A / CBS 708.71 / DSM PE=3 SV=1	S	Function unknown	hypothetical protein ANI_1_874074 [Byssochlamys spectabilis No. 5]
927	--	--	--	--	--	--	--	Integrase core domain	--	R	General function prediction only	hypothetical protein MPER_13182 [Moniliophthora perniciosa FA553]
675	--	--	Molecular Function: catalytic activity (GO:0003824);; Biological Process: metabolic process (GO:0008152);;	--	--	--	--	--	--	S	Function unknown	conserved hypothetical protein [Aspergillus clavatus NRRL 1]
848	--	--	--	--	--	--	--	--	--	S	Function unknown	predicted protein [Aspergillus terreus NIH2624]
952	--	--	Molecular Function: microtubule binding (GO:0008017);; Biological Process: mitotic spindle organization in nucleus (GO:0030472);; Biological Process: regulation of microtubule polymerization or depolymerization (GO:0031110);; Cellular Component: DASH complex (GO:0042729);; Cellular Component: mitotic spindle (GO:0072686);;	K11569|4.34505e-39|ang:ANI_1_454124|An14g03150; DASH complex subunit dad4; K11569 DASH complex subunit DAD4 (A)	--	--	--	--	DASH complex subunit dad4 GN=dad4 OS=Schizosaccharomyces pombe (strain 972 / ATCC 24843) PE=1 SV=2	D	Cell cycle control, cell division, chromosome partitioning	DASH complex subunit dad4 [Aspergillus niger CBS 513.88]
697	--	--	Molecular Function: transferase activity (GO:0016740);; Cellular Component: intracellular organelle (GO:0043229);;	K11422|1.82275e-28|nfi:NFIA_051950|SET domain protein; K11422 histone-lysine N-methyltransferase SETD1 [EC:2.1.1.43] (A)	../inputs/Monascus_purpureus.newGene.longest_transcript.fa.Kegg.pathway	--	--	RNA recognition motif. (a.k.a. RRM, RBD, or RNP domain)	Histone-lysine N-methyltransferase, H3 lysine-4 specific GN=set1 OS=Neosartorya fumigata (strain ATCC MYA-4609 / Af293 / CBS 101355 / FGSC PE=3 SV=1	B	Chromatin structure and dynamics	hypothetical protein ATEG_07403 [Aspergillus terreus NIH2624]
332	--	--	Molecular Function: transferase activity, transferring phosphorus-containing groups (GO:0016772);;	--	--	--	--	--	--	R	General function prediction only	predicted protein [Aspergillus terreus NIH2624]
304	--	--	--	--	--	--	--	--	--	--	--	predicted protein [Aspergillus terreus NIH2624]
605	--	--	--	--	--	--	--	--	--	S	Function unknown	hypothetical protein EURHEDRAFT_511972 [Aspergillus ruber CBS 135680]
864	--	--	--	--	--	--	--	--	--	--	--	hypothetical protein AOR_1_244074 [Aspergillus oryzae RIB40]
1331	--	--	--	--	--	--	--	Mpv17 / PMP22 family	--	S	Function unknown	TPA: integral membrane protein, Mpv17/PMP22 family, putative (AFU_orthologue; AFUA_6G03910) [Aspergillus nidulans FGSC A4]
1286	--	--	Cellular Component: integral component of membrane (GO:0016021);; Biological Process: vesicle-mediated transport (GO:0016192);;	--	--	[U]	Intracellular trafficking, secretion, and vesicular transport	Got1/Sft2-like family	Protein transport protein SFT2 GN=SFT2 OS=Saccharomyces cerevisiae (strain ATCC 204508 / S288c) PE=1 SV=1	U	Intracellular trafficking, secretion, and vesicular transport	Golgi traffic protein SFT2, putative [Talaromyces marneffei ATCC 18224]
1260	--	--	--	K18177|4.2374e-19|pbl:PAAG_06512|hypothetical protein; K18177 cytochrome c oxidase assembly factor 4 (A)	--	--	--	--	--	S	Function unknown	predicted protein [Paracoccidioides sp. &apos;lutzii&apos; Pb01]
712	--	--	Molecular Function: hydrolase activity (GO:0016787);;	--	--	--	--	Calcineurin-like phosphoesterase	--	R	General function prediction only	calcineurin-like phosphoesterase [Aspergillus kawachii IFO 4308]
754	--	--	Molecular Function: transferase activity, transferring phosphorus-containing groups (GO:0016772);;	--	--	--	--	--	--	S	Function unknown	phosphotransferase enzyme family protein [Histoplasma capsulatum H88]
522	--	--	--	--	--	--	--	--	Putative uncharacterized protein ART2 GN=ART2 OS=Saccharomyces cerevisiae (strain ATCC 204508 / S288c) PE=5 SV=1	S	Function unknown	hypothetical protein COCC4DRAFT_155466 [Bipolaris maydis ATCC 48331]
347	[O]	Posttranslational modification, protein turnover, chaperones	Cellular Component: ribosome (GO:0005840);; Biological Process: protein neddylation (GO:0045116);;	K12158|5.92712e-46|pcs:Pc13g04610|Pc13g04610; K12158 ubiquitin-like protein Nedd8 (A)	--	[DO]	--	Ubiquitin family;; Ubiquitin-2 like Rad60 SUMO-like	Ubiquitin-like protein 1 GN=ubl1 OS=Schizosaccharomyces pombe (strain 972 / ATCC 24843) PE=3 SV=1	O	Posttranslational modification, protein turnover, chaperones	Ubiquitin-like protein 1 [Penicillium roqueforti FM164]
553	--	--	Biological Process: alcohol metabolic process (GO:0006066);; Molecular Function: choline dehydrogenase activity (GO:0008812);; Molecular Function: glucose oxidase activity (GO:0046562);; Molecular Function: flavin adenine dinucleotide binding (GO:0050660);; Biological Process: oxidation-reduction process (GO:0055114);;	--	--	--	--	GMC oxidoreductase	Glucose oxidase (Precursor) GN=gox OS=Aspergillus niger PE=1 SV=1	S	Function unknown	conserved hypothetical protein [Talaromyces stipitatus ATCC 10500]
1254	--	--	--	--	--	--	--	--	--	S	Function unknown	hypothetical protein AFUA_6G12880 [Aspergillus fumigatus Af293]
566	--	--	--	--	--	--	--	--	--	S	Function unknown	conserved hypothetical protein [Histoplasma capsulatum G186AR]
532	--	--	--	--	--	--	--	--	--	R	General function prediction only	ankyrin repeat protein [Histoplasma capsulatum G186AR]
1316	--	--	Molecular Function: nucleic acid binding (GO:0003676);; Biological Process: biosynthetic process (GO:0009058);; Molecular Function: transferase activity (GO:0016740);; Molecular Function: hydrolase activity, acting on ester bonds (GO:0016788);;	--	--	--	--	--	--	R	General function prediction only	reverse transcriptase [Monascus pilosus]
1144	--	--	--	--	--	--	--	Fungal Zn(2)-Cys(6) binuclear cluster domain	--	--	--	fungal specific transcription factor [Neurospora crassa OR74A]
1115	--	--	--	--	--	--	--	--	--	--	--	hypothetical protein TSTA_020850 [Talaromyces stipitatus ATCC 10500]
331	[RTKL]	General function prediction only;; Signal transduction mechanisms;; Transcription;; Replication, recombination and repair	Molecular Function: protein kinase activity (GO:0004672);; Biological Process: phosphorylation (GO:0016310);;	--	--	[T]	Signal transduction mechanisms	--	Protein kinase dsk1 GN=dsk1 OS=Schizosaccharomyces pombe (strain 972 / ATCC 24843) PE=3 SV=2	T	Signal transduction mechanisms	protein kinase [Aspergillus oryzae RIB40]
1101	--	--	--	--	--	--	--	--	--	--	--	hypothetical protein EURHEDRAFT_533867 [Aspergillus ruber CBS 135680]
70	--	--	Cellular Component: mitochondrial proton-transporting ATP synthase complex, coupling factor F(o) (GO:0000276);; Biological Process: ATP synthesis coupled proton transport (GO:0015986);; Biological Process: mitochondrial proton-transporting ATP synthase complex assembly (GO:0033615);; Molecular Function: proton-transporting ATP synthase activity, rotational mechanism (GO:0046933);; Molecular Funct…	K02142|2.2882e-22|nfi:NFIA_034650|mitochondrial F1F0 ATP synthase subunit Atp18, putative; K02142 F-type H+-transporting ATPase subunit j (A)	../inputs/Monascus_purpureus.newGene.longest_transcript.fa.Kegg.pathway	--	--	ATP synthase j chain	ATP synthase subunit J, mitochondrial GN=atp18 OS=Schizosaccharomyces pombe (strain 972 / ATCC 24843) PE=4 SV=1	C	Energy production and conversion	mitochondrial F1F0 ATP synthase subunit Atp18, putative [Neosartorya fischeri NRRL 181]
1236	--	--	Molecular Function: DNA binding (GO:0003677);; Molecular Function: zinc ion binding (GO:0008270);;	--	--	--	--	Tc5 transposase DNA-binding domain;; helix-turn-helix, Psq domain;; DDE superfamily endonuclease	--	S	Function unknown	transposase [Aspergillus fumigatus]
281	[HC]	Coenzyme transport and metabolism;; Energy production and conversion	--	K00480|1.23062e-30|ttt:THITE_160953|hypothetical protein; K00480 salicylate hydroxylase [EC:1.14.13.1] (A)	../inputs/Monascus_purpureus.newGene.longest_transcript.fa.Kegg.pathway	--	--	Phosphopantetheine attachment site	Conidial yellow pigment biosynthesis polyketide synthase GN=wA OS=Emericella nidulans (strain FGSC A4 / ATCC 38163 / CBS 112.46 / NRRL PE=1 SV=2	C	Energy production and conversion	hypothetical protein THITE_160953 [Thielavia terrestris NRRL 8126]
1160	--	--	Cellular Component: integral component of membrane (GO:0016021);; Biological Process: transmembrane transport (GO:0055085);;	--	--	--	--	--	--	S	Function unknown	hypothetical protein NFIA_009640 [Neosartorya fischeri NRRL 181]
1364	--	--	Molecular Function: nucleic acid binding (GO:0003676);;	--	--	--	--	--	--	L	Replication, recombination and repair	hypothetical protein EPUS_08998 [Endocarpon pusillum Z07020]
499	--	--	Molecular Function: oxidoreductase activity, acting on CH-OH group of donors (GO:0016614);;	--	--	--	--	FAD linked oxidases, C-terminal domain;; FAD binding domain	Vanillyl-alcohol oxidase GN=VAOA OS=Penicillium simplicissimum PE=1 SV=1	R	General function prediction only	aryl-alcohol oxidase [Aspergillus ruber CBS 135680]
863	--	--	Molecular Function: transferase activity, transferring phosphorus-containing groups (GO:0016772);;	--	--	--	--	--	--	S	Function unknown	hypothetical protein NFIA_057850 [Neosartorya fischeri NRRL 181]
375	--	--	Molecular Function: copper ion binding (GO:0005507);;	--	--	[O]	Posttranslational modification, protein turnover, chaperones	Cytochrome c oxidase assembly protein CtaG/Cox11	Cytochrome c oxidase assembly protein COX11, mitochondrial (Precursor) GN=COX11 OS=Saccharomyces cerevisiae (strain ATCC 204508 / S288c) PE=3 SV=2	O	Posttranslational modification, protein turnover, chaperones	cytochrome c oxidase assembly protein COX11, mitochondrial precursor [Aspergillus terreus NIH2624]
744	--	--	--	--	--	--	--	--	--	S	Function unknown	Pc21g02800 [Penicillium rubens Wisconsin 54-1255]
922	--	--	--	K01279|4.08791e-15|nfi:NFIA_068200|tripeptidyl peptidase SED3; K01279 tripeptidyl-peptidase I [EC:3.4.14.9] (A)	--	--	--	--	Tripeptidyl-peptidase sed3 (Precursor) GN=sed3 OS=Neosartorya fumigata (strain ATCC MYA-4609 / Af293 / CBS 101355 / FGSC PE=1 SV=1	O	Posttranslational modification, protein turnover, chaperones	tripeptidyl peptidase SED3 [Neosartorya fischeri NRRL 181]
920	--	--	--	--	--	--	--	--	--	R	General function prediction only	hypothetical protein ANI_1_262044 [Aspergillus niger CBS 513.88]
1091	--	--	--	--	--	--	--	--	--	--	--	hypothetical protein PAAG_11067 [Paracoccidioides sp. &apos;lutzii&apos; Pb01]
362	[F]	Nucleotide transport and metabolism	--	--	--	--	--	--	Purine-cytosine permease fcyB GN=fcyB OS=Emericella nidulans (strain FGSC A4 / ATCC 38163 / CBS 112.46 / NRRL PE=1 SV=1	F	Nucleotide transport and metabolism	hypothetical protein V499_09472 [Pseudogymnoascus pannorum VKM F-103]
32	--	--	--	--	--	--	--	--	--	--	--	MFS general substrate transporter [Aspergillus ruber CBS 135680]
420	--	--	--	--	--	--	--	--	--	S	Function unknown	conserved hypothetical protein [Histoplasma capsulatum H143]
683	--	--	Molecular Function: hydrolase activity (GO:0016787);;	--	--	--	--	Phospholipase/Carboxylesterase	--	S	Function unknown	conserved hypothetical protein [Aspergillus flavus NRRL3357]
1228	--	--	Molecular Function: transferase activity, transferring acyl groups other than amino-acyl groups (GO:0016747);; Biological Process: single-organism metabolic process (GO:0044710);;	--	--	--	--	Acyl transferase domain;; Polyketide synthase dehydratase	Lovastatin diketide synthase LovF GN=lovF OS=Aspergillus terreus PE=1 SV=1	I	Lipid transport and metabolism	hypothetical protein PVAR5_3699 [Byssochlamys spectabilis No. 5]
489	[RTKL]	General function prediction only;; Signal transduction mechanisms;; Transcription;; Replication, recombination and repair	Molecular Function: protein kinase activity (GO:0004672);; Biological Process: phosphorylation (GO:0016310);;	--	--	[D]	Cell cycle control, cell division, chromosome partitioning	Protein tyrosine kinase;; Protein kinase domain	Cell cycle serine/threonine-protein kinase CDC5/MSD2 GN=YM8270.03C OS=Saccharomyces cerevisiae (strain ATCC 204508 / S288c) PE=1 SV=1	T	Signal transduction mechanisms	serine-threonine protein kinase, putative [Talaromyces stipitatus ATCC 10500]
983	--	--	--	--	--	--	--	--	--	S	Function unknown	conserved hypothetical protein [Aspergillus clavatus NRRL 1]
630	--	--	--	--	--	--	--	--	--	S	Function unknown	hypothetical protein PEXP_002500 [Penicillium expansum]
1037	--	--	--	--	--	--	--	--	--	--	--	hypothetical protein AFLA_020230 [Aspergillus flavus NRRL3357]
759	[IQR]	Lipid transport and metabolism;; Secondary metabolites biosynthesis, transport and catabolism;; General function prediction only	--	--	--	--	--	--	Chanoclavine-I dehydrogenase GN=ARB_04646 OS=Arthroderma benhamiae (strain ATCC MYA-4681 / CBS 112371) PE=1 SV=1	Q	Secondary metabolites biosynthesis, transport and catabolism	hypothetical protein HMPREF1541_09777 [Cyphellophora europaea CBS 101466]
773	--	--	Biological Process: DNA repair (GO:0006281);; Biological Process: mitotic recombination (GO:0006312);;	--	--	--	--	ATP-dependent protease La (LON) domain;; Ring finger domain;; zinc finger of C3HC4-type, RING;; Zinc finger, C3HC4 type (RING finger);; Zinc finger, C3HC4 type (RING finger);; zinc-RING finger domain;; Zinc finger, C3HC4 type (RING finger)	LON peptidase N-terminal domain and RING finger protein C14F5.10c GN=SPBC14F5.10c OS=Schizosaccharomyces pombe (strain 972 / ATCC 24843) PE=3 SV=1	O	Posttranslational modification, protein turnover, chaperones	ATP-dependent protease (CrgA), putative [Aspergillus clavatus NRRL 1]
527	--	--	Molecular Function: binding (GO:0005488);;	--	--	--	--	--	--	S	Function unknown	hypothetical protein BA78_8463, partial [Aspergillus fumigatus var. RP-2014]
3	--	--	Molecular Function: transferase activity (GO:0016740);;	--	--	--	--	--	--	S	Function unknown	hypothetical protein AFLA_106080 [Aspergillus flavus NRRL3357]
1003	--	--	--	--	--	--	--	--	--	R	General function prediction only	hypothetical protein OIDMADRAFT_48880 [Oidiodendron maius Zn]
961	--	--	--	--	--	--	--	--	--	R	General function prediction only	F-box domain protein [Aspergillus ruber CBS 135680]
465	--	--	--	--	--	--	--	--	--	S	Function unknown	hypothetical protein [Penicillium rubens Wisconsin 54-1255]
8	--	--	--	--	--	--	--	--	--	G	Carbohydrate transport and metabolism	prenylcysteine lyase [Byssochlamys spectabilis No. 5]
225	--	--	Cellular Component: membrane (GO:0016020);;	--	--	--	--	Plexin repeat	--	S	Function unknown	hypothetical protein AOR_1_458074 [Aspergillus oryzae RIB40]
94	--	--	Molecular Function: binding (GO:0005488);; Biological Process: transcription, DNA-templated (GO:0006351);;	--	--	--	--	--	--	S	Function unknown	MADS-box protein SVP [Talaromyces marneffei PM1]
1366	--	--	Molecular Function: magnesium ion transmembrane transporter activity (GO:0015095);; Biological Process: magnesium ion transport (GO:0015693);; Cellular Component: membrane (GO:0016020);;	--	--	--	--	Magnesium transporter NIPA	--	S	Function unknown	putative duf803 domain membrane protein [Eutypa lata UCREL1]
1199	--	--	--	--	--	--	--	--	--	S	Function unknown	hypothetical protein AN9537.2 [Aspergillus nidulans FGSC A4]
1178	--	--	--	--	--	--	--	--	--	--	--	putative gag-pol poly protein [Botrytis cinerea BcDW1]
953	--	--	Molecular Function: transferase activity, transferring phosphorus-containing groups (GO:0016772);; Biological Process: primary metabolic process (GO:0044238);; Biological Process: cellular macromolecule metabolic process (GO:0044260);;	--	--	--	--	--	--	S	Function unknown	conserved hypothetical protein [Talaromyces stipitatus ATCC 10500]
970	--	--	Molecular Function: sequence-specific DNA binding RNA polymerase II transcription factor activity (GO:0000981);; Molecular Function: DNA binding (GO:0003677);; Cellular Component: nucleus (GO:0005634);; Biological Process: regulation of transcription from RNA polymerase II promoter (GO:0006357);; Molecular Function: zinc ion binding (GO:0008270);; Cellular Component: integral component of membran…	--	--	--	--	DDE superfamily endonuclease;; helix-turn-helix, Psq domain;; Tc5 transposase DNA-binding domain	--	S	Function unknown	pogo transposable element, putative [Talaromyces marneffei ATCC 18224]
1274	--	--	Biological Process: lipid biosynthetic process (GO:0008610);;	--	--	--	--	--	--	S	Function unknown	conserved hypothetical protein [Arthroderma otae CBS 113480]
288	--	--	--	--	--	--	--	--	--	S	Function unknown	hypothetical protein PDE_06391 [Penicillium oxalicum 114-2]
1182	--	--	--	--	--	--	--	--	--	S	Function unknown	putative integral membrane protein [Neofusicoccum parvum UCRNP2]
188	[R]	General function prediction only	--	--	--	--	--	--	Protein YRO2 GN=YRO2 OS=Saccharomyces cerevisiae (strain ATCC 204508 / S288c) PE=1 SV=1	S	Function unknown	hypothetical protein A1O5_04943 [Cladophialophora psammophila CBS 110553]
799	--	--	--	--	--	--	--	--	--	S	Function unknown	hypothetical protein PEX2_021830 [Penicillium expansum]
162	--	--	Molecular Function: DNA binding (GO:0003677);; Molecular Function: chromatin binding (GO:0003682);; Molecular Function: glutamate-tRNA ligase activity (GO:0004818);; Molecular Function: ATP binding (GO:0005524);; Cellular Component: cytoplasm (GO:0005737);; Biological Process: glutamyl-tRNA aminoacylation (GO:0006424);; Molecular Function: hydrolase activity, acting on glycosyl bonds (GO:0016798)…	--	--	--	--	Myb-like DNA-binding domain	--	S	Function unknown	hypothetical protein AFUB_071130 [Aspergillus fumigatus A1163]
455	--	--	--	--	--	--	--	--	--	R	General function prediction only	hypothetical protein CPC735_012000 [Coccidioides posadasii C735 delta SOWgp]
1307	--	--	Biological Process: biosynthetic process (GO:0009058);; Molecular Function: transferase activity (GO:0016740);; Molecular Function: hydrolase activity, acting on ester bonds (GO:0016788);;	--	--	--	--	--	Conidial yellow pigment biosynthesis polyketide synthase GN=wA OS=Emericella nidulans (strain FGSC A4 / ATCC 38163 / CBS 112.46 / NRRL PE=1 SV=2	I	Lipid transport and metabolism	polyketide synthase [Monascus purpureus]
68	--	--	--	--	--	--	--	--	--	S	Function unknown	hypothetical protein [Penicillium rubens Wisconsin 54-1255]
782	--	--	--	--	--	--	--	Tc5 transposase DNA-binding domain	--	S	Function unknown	Pc18g02520 [Penicillium rubens Wisconsin 54-1255]
495	--	--	--	--	--	--	--	--	--	R	General function prediction only	C2H2 finger domain protein [Aspergillus fumigatus A1163]
1275	--	--	Biological Process: lipid biosynthetic process (GO:0008610);;	--	--	--	--	--	--	S	Function unknown	conserved hypothetical protein [Arthroderma otae CBS 113480]
429	--	--	--	--	--	--	--	--	--	S	Function unknown	hypothetical protein AFUB_009840 [Aspergillus fumigatus A1163]
67	--	--	Biological Process: DNA metabolic process (GO:0006259);;	--	--	--	--	Transposase;; Homeodomain-like domain	--	S	Function unknown	unnamed protein product [Aspergillus niger]
97	--	--	--	--	--	--	--	--	--	S	Function unknown	hypothetical protein V501_05701 [Pseudogymnoascus pannorum VKM F-4519 (FW-2642)]
84	--	--	Molecular Function: DNA binding (GO:0003677);; Molecular Function: zinc ion binding (GO:0008270);;	--	--	--	--	--	--	--	--	transposase [Aspergillus fumigatus]
408	--	--	Molecular Function: transferase activity (GO:0016740);; Biological Process: pigment metabolic process involved in developmental pigmentation (GO:0043324);; Biological Process: conidiophore development (GO:0070787);; Biological Process: fumonisin catabolic process (GO:1900540);; Biological Process: (+)-kotanin biosynthetic process (GO:1900596);; Biological Process: demethylkotanin biosynthetic pro…	K06133|7.37226e-09|nfi:NFIA_084210|4'-phosphopantetheinyl transferase NpgA; K06133 4'-phosphopantetheinyl transferase [EC:2.7.8.-] (A)	../inputs/Monascus_purpureus.newGene.longest_transcript.fa.Kegg.pathway	--	--	--	--	S	Function unknown	4&apos;-phosphopantetheinyl transferase NpgA [Neosartorya fischeri NRRL 181]
377	--	--	--	--	--	--	--	--	--	S	Function unknown	hypothetical protein CPC735_057070 [Byssochlamys spectabilis No. 5]
999	[R]	General function prediction only	Cellular Component: membrane (GO:0016020);; Molecular Function: transferase activity (GO:0016740);; Molecular Function: metal ion binding (GO:0046872);;	--	--	[R]	General function prediction only	DHHC palmitoyltransferase	Palmitoyltransferase pfa5 GN=pfa5 OS=Neosartorya fumigata (strain ATCC MYA-4609 / Af293 / CBS 101355 / FGSC PE=3 SV=2	R	General function prediction only	DHHC zinc finger membrane protein [Aspergillus fumigatus A1163]
1332	--	--	Biological Process: DNA metabolic process (GO:0006259);; Molecular Function: oxidoreductase activity, acting on the CH-CH group of donors (GO:0016627);; Molecular Function: organic cyclic compound binding (GO:0097159);; Molecular Function: heterocyclic compound binding (GO:1901363);;	--	--	--	--	--	--	R	General function prediction only	hypothetical protein CIMG_02752 [Coccidioides immitis RS]
802	--	--	Molecular Function: cytochrome-c oxidase activity (GO:0004129);; Cellular Component: mitochondrial respiratory chain (GO:0005746);; Biological Process: respiratory electron transport chain (GO:0022904);;	K02269|1.48753e-24|act:ACLA_041890|cytochrome c oxidase family protein; K02269 cytochrome c oxidase subunit 7 (A)	../inputs/Monascus_purpureus.newGene.longest_transcript.fa.Kegg.pathway	--	--	--	Cytochrome c oxidase subunit 7A (Precursor) GN=COX9 OS=Ashbya gossypii (strain ATCC 10895 / CBS 109.51 / FGSC 9923 / NRRL PE=3 SV=3	C	Energy production and conversion	TPA: cytochrome c oxidase family protein (AFU_orthologue; AFUA_3G14440) [Aspergillus nidulans FGSC A4]
1006	--	--	Molecular Function: nucleic acid binding (GO:0003676);; Biological Process: nucleobase-containing compound metabolic process (GO:0006139);; Molecular Function: nucleotidyltransferase activity (GO:0016779);;	--	--	--	--	--	--	R	General function prediction only	reverse transcriptase, putative [Talaromyces stipitatus ATCC 10500]
699	[G]	Carbohydrate transport and metabolism	--	--	--	--	--	Cupin domain;; Cupin;; AraC-like ligand binding domain	--	S	Function unknown	hypothetical protein AKAW_09048 [Aspergillus kawachii IFO 4308]
565	--	--	Molecular Function: nucleic acid binding (GO:0003676);;	--	--	--	--	--	--	S	Function unknown	Probable transposable element [Penicillium roqueforti FM164]
92	--	--	--	--	--	--	--	--	--	S	Function unknown	unnamed protein product [Aspergillus oryzae RIB40]
1239	[RTKL]	General function prediction only;; Signal transduction mechanisms;; Transcription;; Replication, recombination and repair	Molecular Function: protein tyrosine kinase activity (GO:0004713);; Molecular Function: ATP binding (GO:0005524);; Biological Process: protein phosphorylation (GO:0006468);;	--	--	--	--	Protein tyrosine kinase;; Protein kinase domain	Spindle assembly checkpoint kinase GN=IPL1 OS=Yarrowia lipolytica (strain CLIB 122 / E 150) PE=3 SV=1	T	Signal transduction mechanisms	Pc12g13150 [Penicillium rubens Wisconsin 54-1255]
674	--	--	--	--	--	--	--	--	--	S	Function unknown	unnamed protein product [Penicillium roqueforti FM164]
503	[C]	Energy production and conversion	Molecular Function: FMN binding (GO:0010181);; Molecular Function: oxidoreductase activity (GO:0016491);; Biological Process: oxidation-reduction process (GO:0055114);;	--	--	[CR]	--	NADH:flavin oxidoreductase / NADH oxidase family	Putative NADPH dehydrogenase C23G7.10c GN=SPBC23G7.10c OS=Schizosaccharomyces pombe (strain 972 / ATCC 24843) PE=3 SV=1	C	Energy production and conversion	Pc12g00200 [Penicillium rubens Wisconsin 54-1255]
1329	--	--	--	--	--	--	--	--	--	S	Function unknown	hypothetical protein EURHEDRAFT_460570 [Aspergillus ruber CBS 135680]
318	--	--	Molecular Function: catalytic activity (GO:0003824);; Molecular Function: metal ion binding (GO:0046872);;	--	--	--	--	--	--	R	General function prediction only	hypothetical protein NFIA_005060 [Neosartorya fischeri NRRL 181]
642	--	--	--	--	--	--	--	--	--	R	General function prediction only	hypothetical protein SMAC_09189 [Sordaria macrospora k-hell]
446	--	--	Molecular Function: N-acetyltransferase activity (GO:0008080);;	--	--	--	--	--	--	R	General function prediction only	unnamed protein product [Aspergillus oryzae RIB40]
788	--	--	Molecular Function: aminoacyl-tRNA editing activity (GO:0002161);; Molecular Function: isoleucine-tRNA ligase activity (GO:0004822);; Molecular Function: ATP binding (GO:0005524);; Cellular Component: cytoplasm (GO:0005737);; Biological Process: isoleucyl-tRNA aminoacylation (GO:0006428);; Biological Process: regulation of translational fidelity (GO:0006450);;	--	--	--	--	--	--	S	Function unknown	hypothetical protein MPH_13357 [Macrophomina phaseolina MS6]
1069	--	--	--	--	--	--	--	--	--	--	--	conserved hypothetical protein [Aspergillus flavus NRRL3357]
199	--	--	--	--	--	--	--	--	--	S	Function unknown	hypothetical protein W97_03294 [Coniosporium apollinis CBS 100218]
964	--	--	--	--	--	--	--	--	--	--	--	hypothetical protein AOL_s00054g878 [Arthrobotrys oligospora ATCC 24927]
1242	--	--	Biological Process: transcription, DNA-templated (GO:0006351);;	--	--	--	--	--	--	S	Function unknown	conserved hypothetical protein [Byssochlamys spectabilis No. 5]
18	--	--	--	--	--	--	--	--	--	S	Function unknown	integral membrane protein [Aspergillus kawachii IFO 4308]
1193	--	--	--	--	--	--	--	--	--	S	Function unknown	hypothetical protein EURHEDRAFT_515067 [Aspergillus ruber CBS 135680]
168	--	--	--	--	--	--	--	--	--	--	--	hypothetical protein A1O3_03220 [Capronia epimyces CBS 606.96]
666	--	--	--	--	--	--	--	Protein of unknown function (DUF1264);; Protein of unknown function (DUF1264)	--	S	Function unknown	DUF1264 domain protein [Aspergillus clavatus NRRL 1]
780	--	--	--	--	--	--	--	--	--	S	Function unknown	hypothetical protein Ao3042_05713 [Aspergillus oryzae 3.042]
568	--	--	Molecular Function: methyltransferase activity (GO:0008168);; Biological Process: methylation (GO:0032259);;	--	--	--	--	--	--	R	General function prediction only	UMTA [Microsporum gypseum CBS 118893]
418	--	--	--	--	--	--	--	Putative serine esterase (DUF676)	--	S	Function unknown	hypothetical protein CSUB01_05067 [Colletotrichum sublineola]
871	[IQR]	Lipid transport and metabolism;; Secondary metabolites biosynthesis, transport and catabolism;; General function prediction only	Biological Process: metabolic process (GO:0008152);;	--	--	--	--	--	--	Q	Secondary metabolites biosynthesis, transport and catabolism	hypothetical protein A1O3_09350 [Capronia epimyces CBS 606.96]
1226	--	--	--	--	--	--	--	--	--	S	Function unknown	hypothetical protein CIMG_02301 [Coccidioides immitis RS]
772	--	--	Biological Process: DNA repair (GO:0006281);; Biological Process: mitotic recombination (GO:0006312);;	--	--	--	--	ATP-dependent protease La (LON) domain;; Ring finger domain;; zinc finger of C3HC4-type, RING;; Zinc finger, C3HC4 type (RING finger);; Zinc finger, C3HC4 type (RING finger);; zinc-RING finger domain;; Zinc finger, C3HC4 type (RING finger)	LON peptidase N-terminal domain and RING finger protein C14F5.10c GN=SPBC14F5.10c OS=Schizosaccharomyces pombe (strain 972 / ATCC 24843) PE=3 SV=1	O	Posttranslational modification, protein turnover, chaperones	ATP-dependent protease (CrgA), putative [Aspergillus clavatus NRRL 1]
396	[I]	Lipid transport and metabolism	Biological Process: metabolic process (GO:0008152);; Molecular Function: oxidoreductase activity, acting on the CH-CH group of donors (GO:0016627);;	--	--	--	--	--	--	I	Lipid transport and metabolism	acyl-CoA dehydrogenase [Aspergillus flavus NRRL3357]
219	--	--	--	--	--	--	--	NAD(P)-binding Rossmann-like domain;; FAD dependent oxidoreductase;; FAD binding domain;; GMC oxidoreductase	Beta-cyclopiazonate dehydrogenase {ECO:0000305} (Precursor) OS=Aspergillus oryzae (Yellow koji mold) PE=1 SV=1	R	General function prediction only	CtnDup1 [Monascus ruber]
741	--	--	--	--	--	--	--	--	--	S	Function unknown	TPA: conserved hypothetical protein [Aspergillus nidulans FGSC A4]
1297	--	--	Molecular Function: protein serine/threonine kinase activity (GO:0004674);; Molecular Function: ATP binding (GO:0005524);; Biological Process: protein phosphorylation (GO:0006468);;	--	--	--	--	--	Serine/threonine-protein kinase YPK1 GN=YPK1 OS=Saccharomyces cerevisiae (strain ATCC 204508 / S288c) PE=1 SV=2	T	Signal transduction mechanisms	protein kinase, putative [Aspergillus fumigatus A1163]
1321	--	--	--	--	--	--	--	--	--	--	--	hypothetical protein H072_4023 [Dactylellina haptotyla CBS 200.50]
306	--	--	--	--	--	--	--	--	--	S	Function unknown	conserved hypothetical protein [Aspergillus fumigatus A1163]
1146	[J]	Translation, ribosomal structure and biogenesis	Molecular Function: structural constituent of ribosome (GO:0003735);; Cellular Component: ribosome (GO:0005840);; Biological Process: translation (GO:0006412);;	K02979|9.09972e-28|nfi:NFIA_025460|40S ribosomal protein S28; K02979 small subunit ribosomal protein S28e (A)	../inputs/Monascus_purpureus.newGene.longest_transcript.fa.Kegg.pathway	[J]	Translation, ribosomal structure and biogenesis	Ribosomal protein S28e	40S ribosomal protein S28 GN=rps-28 OS=Neurospora crassa (strain ATCC 24698 / 74-OR23-1A / CBS 708.71 / DSM PE=3 SV=1	J	Translation, ribosomal structure and biogenesis	40S ribosomal protein S28 [Neosartorya fischeri NRRL 181]
471	--	--	--	--	--	--	--	Helicase conserved C-terminal domain	--	--	--	telomere-associated RecQ helicase [Aspergillus fumigatus Af293]
538	--	--	--	--	--	--	--	--	--	S	Function unknown	hypothetical protein AFLA_068640 [Aspergillus flavus NRRL3357]
1071	--	--	--	--	--	--	--	--	--	S	Function unknown	hypothetical protein PDIP_75160 [Penicillium digitatum Pd1]
580	--	--	--	--	--	--	--	--	--	--	--	hypothetical protein A1O1_02692 [Capronia coronata CBS 617.96]
447	--	--	Molecular Function: binding (GO:0005488);;	--	--	--	--	--	--	S	Function unknown	hypothetical protein AN8557.2 [Aspergillus nidulans FGSC A4]
1126	--	--	Molecular Function: nucleic acid binding (GO:0003676);;	--	--	--	--	helix-turn-helix, Psq domain	--	S	Function unknown	transposase [Aspergillus fumigatus]
526	[E]	Amino acid transport and metabolism	Biological Process: tryptophan biosynthetic process (GO:0000162);; Molecular Function: anthranilate synthase activity (GO:0004049);; Molecular Function: saccharopine dehydrogenase (NAD+, L-lysine-forming) activity (GO:0004754);; Molecular Function: saccharopine dehydrogenase (NADP+, L-glutamate-forming) activity (GO:0004755);; Biological Process: lysine metabolic process (GO:0006553);; Biological…	K00293|3.34869e-175|ang:ANI_1_878184|An04g05260; saccharopine dehydrogenase [NADP+, L-glutamate-forming]; K00293 saccharopine dehydrogenase (NADP+, L-glutamate forming) [EC:1.5.1.10] (A)	../inputs/Monascus_purpureus.newGene.longest_transcript.fa.Kegg.pathway	[E]	Amino acid transport and metabolism	Saccharopine dehydrogenase	Saccharopine dehydrogenase [NADP(+), L-glutamate-forming] GN=LYS3 OS=Magnaporthe oryzae (strain 70-15 / ATCC MYA-4617 / FGSC 8958) PE=1 SV=2	E	Amino acid transport and metabolism	saccharopine dehydrogenase [Aspergillus kawachii IFO 4308]
624	[R]	General function prediction only	Molecular Function: zinc ion binding (GO:0008270);; Molecular Function: oxidoreductase activity (GO:0016491);; Biological Process: oxidation-reduction process (GO:0055114);;	K07119|1.58521e-90|nfi:NFIA_025500|alcohol dehydrogenase, zinc-containing; K07119 (A)	--	--	--	Zinc-binding dehydrogenase;; Zinc-binding dehydrogenase	Zinc-type alcohol dehydrogenase-like protein PB24D3.08c GN=SPAPB24D3.08c OS=Schizosaccharomyces pombe (strain 972 / ATCC 24843) PE=3 SV=1	R	General function prediction only	hypothetical protein ATEG_04342 [Aspergillus terreus NIH2624]
520	--	--	--	--	--	--	--	--	Putative uncharacterized protein ART2 GN=ART2 OS=Saccharomyces cerevisiae (strain ATCC 204508 / S288c) PE=5 SV=1	S	Function unknown	hypothetical protein ASPNIDRAFT_143688 [Aspergillus niger ATCC 1015]
1162	--	--	--	--	--	--	--	DDE superfamily endonuclease	--	S	Function unknown	transposon, putative [Talaromyces stipitatus ATCC 10500]
1314	--	--	Molecular Function: DNA binding (GO:0003677);; Cellular Component: nucleus (GO:0005634);; Biological Process: regulation of transcription, DNA-templated (GO:0006355);; Molecular Function: protein dimerization activity (GO:0046983);;	--	--	--	--	--	--	S	Function unknown	Pc04g00050 [Penicillium rubens Wisconsin 54-1255]
981	--	--	Molecular Function: DNA binding (GO:0003677);; Cellular Component: nucleus (GO:0005634);; Biological Process: transcription, DNA-templated (GO:0006351);; Molecular Function: zinc ion binding (GO:0008270);;	--	--	--	--	--	--	R	General function prediction only	krueppel c2h2-type zinc finger protein, putative [Talaromyces marneffei ATCC 18224]
769	[IQR]	Lipid transport and metabolism;; Secondary metabolites biosynthesis, transport and catabolism;; General function prediction only	--	--	--	--	--	--	--	IQ	Lipid transport and metabolism;; Secondary metabolites biosynthesis, transport and catabolism	hypothetical protein A1O3_03124 [Capronia epimyces CBS 606.96]
180	[GEPR]	Carbohydrate transport and metabolism;; Amino acid transport and metabolism;; Inorganic ion transport and metabolism;; General function prediction only	Molecular Function: inorganic phosphate transmembrane transporter activity (GO:0005315);; Biological Process: phosphate ion transport (GO:0006817);; Cellular Component: integral component of membrane (GO:0016021);; Biological Process: transmembrane transport (GO:0055085);;	K08176|4.69446e-67|act:ACLA_054810|phosphate:H+ symporter; K08176 MFS transporter, PHS family, inorganic phosphate transporter (A)	--	[P]	Inorganic ion transport and metabolism	Sugar (and other) transporter	Repressible high-affinity phosphate permease {ECO:0000303|PubMed:7883177} OS=Neurospora crassa (strain ATCC 24698 / 74-OR23-1A / CBS 708.71 / DSM PE=1 SV=2	P	Inorganic ion transport and metabolism	hypothetical protein PDE_08040 [Penicillium oxalicum 114-2]
1281	--	--	Molecular Function: DNA binding (GO:0003677);;	--	--	--	--	--	--	S	Function unknown	conserved hypothetical protein [Aspergillus terreus NIH2624]
1083	--	--	--	--	--	--	--	Protein of unknown function (DUF3723);; Protein of unknown function (DUF3723)	--	S	Function unknown	conserved hypothetical protein [Aspergillus fumigatus A1163]
1191	--	--	Molecular Function: DNA binding (GO:0003677);;	--	--	--	--	DDE superfamily endonuclease;; helix-turn-helix, Psq domain	--	S	Function unknown	conserved hypothetical protein [Aspergillus terreus NIH2624]
296	[R]	General function prediction only	Molecular Function: hydrolase activity (GO:0016787);;	K07047|4.72449e-37|afv:AFLA_038880|amidohydrolase family protein; K07047 (A)	--	--	--	Amidohydrolase;; Amidohydrolase family	--	S	Function unknown	conserved hypothetical protein [Aspergillus terreus NIH2624]
1317	--	--	--	--	--	--	--	--	--	S	Function unknown	predicted protein [Histoplasma capsulatum NAm1]
651	--	--	Biological Process: DNA metabolic process (GO:0006259);;	--	--	--	--	Homeodomain-like domain	--	S	Function unknown	TPA: conserved hypothetical protein [Aspergillus nidulans FGSC A4]
462	--	--	Molecular Function: protein heterodimerization activity (GO:0046982);;	--	--	--	--	Kinetochore component CENP-S	MHF histone-fold complex subunit 1 {ECO:0000305|PubMed:20347428} OS=Schizosaccharomyces pombe (strain 972 / ATCC 24843) PE=1 SV=2	S	Function unknown	conserved hypothetical protein [Aspergillus clavatus NRRL 1]
539	--	--	Molecular Function: protein kinase activity (GO:0004672);; Molecular Function: ATP binding (GO:0005524);; Biological Process: protein phosphorylation (GO:0006468);;	--	--	--	--	--	--	T	Signal transduction mechanisms	conserved hypothetical protein [Arthroderma otae CBS 113480]
453	--	--	Molecular Function: hydrolase activity (GO:0016787);;	--	--	--	--	--	--	R	General function prediction only	hypothetical protein EURHEDRAFT_451869 [Aspergillus ruber CBS 135680]
1273	--	--	--	--	--	--	--	--	--	S	Function unknown	hypothetical protein PDIP_41790 [Penicillium digitatum Pd1]
1289	[S]	Function unknown	Biological Process: metabolic process (GO:0008152);; Molecular Function: carbon-sulfur lyase activity (GO:0016846);;	--	--	--	--	Glutathione-dependent formaldehyde-activating enzyme	Cytochrome c oxidase assembly protein COX19 GN=COX19 OS=Paracoccidioides brasiliensis PE=3 SV=1	S	Function unknown	Glutathione-dependent formaldehyde-activating enzyme/centromere protein V [Penicillium expansum]
934	--	--	--	--	--	--	--	--	--	R	General function prediction only	MFS multidrug transporter [Aspergillus niger CBS 513.88]
1044	--	--	Molecular Function: ferric-chelate reductase activity (GO:0000293);; Cellular Component: integral component of membrane (GO:0016021);; Biological Process: oxidation-reduction process (GO:0055114);;	--	--	--	--	--	--	S	Function unknown	cell surface metalloreductase FreA-like, putative [Aspergillus flavus NRRL3357]
452	--	--	--	--	--	--	--	--	--	R	General function prediction only	putative gag-pol poly protein [Botrytis cinerea BcDW1]
948	--	--	--	--	--	--	--	--	--	S	Function unknown	hypothetical protein SETTUDRAFT_148034 [Setosphaeria turcica Et28A]
280	--	--	--	--	--	--	--	--	--	--	--	reverse transcriptase, putative [Blumeria graminis f. sp. hordei DH14]
692	--	--	--	--	--	--	--	--	--	S	Function unknown	conserved hypothetical protein [Aspergillus flavus NRRL3357]
140	--	--	--	--	--	--	--	M-phase-specific PLK1-interacting protein	--	--	--	predicted protein [Byssochlamys spectabilis No. 5]
771	[R]	General function prediction only	Molecular Function: nucleotide binding (GO:0000166);; Molecular Function: nucleic acid binding (GO:0003676);;	--	--	[R]	General function prediction only	--	Negative regulator of differentiation 1 GN=nrd1 OS=Schizosaccharomyces pombe (strain 972 / ATCC 24843) PE=1 SV=1	S	Function unknown	conserved hypothetical protein [Aspergillus terreus NIH2624]
385	--	--	--	--	--	--	--	--	--	--	--	hypothetical protein CMQ_5712 [Grosmannia clavigera kw1407]
614	--	--	Molecular Function: nucleotide binding (GO:0000166);; Molecular Function: peptidase activity (GO:0008233);;	--	--	--	--	--	--	R	General function prediction only	Reticulocyte-binding protein 2 like a [Talaromyces marneffei PM1]
195	[GEPR]	Carbohydrate transport and metabolism;; Amino acid transport and metabolism;; Inorganic ion transport and metabolism;; General function prediction only	--	--	--	[G]	Carbohydrate transport and metabolism	Major Facilitator Superfamily;; Sugar (and other) transporter	Uncharacterized transporter C1002.16c GN=SPAC1002.16c OS=Schizosaccharomyces pombe (strain 972 / ATCC 24843) PE=3 SV=1	G	Carbohydrate transport and metabolism	MFS general substrate transporter [Aspergillus ruber CBS 135680]
1137	--	--	Molecular Function: oxidoreductase activity (GO:0016491);; Molecular Function: metal ion binding (GO:0046872);;	--	--	--	--	Cytochrome P450	--	Q	Secondary metabolites biosynthesis, transport and catabolism	putative cytochrome p450 protein [Neofusicoccum parvum UCRNP2]
73	--	--	--	--	--	--	--	--	--	--	--	hypothetical protein TCE0_044r16700 [Talaromyces cellulolyticus]
419	--	--	--	--	--	--	--	--	--	S	Function unknown	conserved hypothetical protein [Histoplasma capsulatum H143]
378	--	--	--	--	--	--	--	--	--	--	--	putative fad dependent protein [Eutypa lata UCREL1]
357	--	--	--	--	--	--	--	--	--	L	Replication, recombination and repair	NF-X1 finger and helicase domain protein, putative [Talaromyces stipitatus ATCC 10500]
673	--	--	--	--	--	--	--	--	--	S	Function unknown	hypothetical protein TRIATDRAFT_147782 [Trichoderma atroviride IMI 206040]
323	--	--	--	--	--	--	--	--	--	--	--	hypothetical protein EURHEDRAFT_382268 [Aspergillus ruber CBS 135680]
55	--	--	Molecular Function: catalytic activity (GO:0003824);; Biological Process: drug transmembrane transport (GO:0006855);; Molecular Function: drug transmembrane transporter activity (GO:0015238);; Molecular Function: antiporter activity (GO:0015297);; Cellular Component: membrane (GO:0016020);;	--	--	--	--	--	--	S	Function unknown	hypothetical protein CHGG_03785 [Chaetomium globosum CBS 148.51]
937	--	--	--	--	--	--	--	--	--	S	Function unknown	conserved hypothetical protein [Talaromyces stipitatus ATCC 10500]
173	--	--	--	--	--	--	--	--	--	--	--	Major facilitator superfamily domain, general substrate transporter [Penicillium expansum]
513	--	--	Molecular Function: transferase activity, transferring hexosyl groups (GO:0016758);;	--	--	--	--	--	Chitin synthase D GN=chsD OS=Neosartorya fumigata (strain ATCC MYA-4609 / Af293 / CBS 101355 / FGSC PE=3 SV=1	M	Cell wall/membrane/envelope biogenesis	chitin synthase class VI [Byssochlamys spectabilis No. 5]
325	--	--	--	K08597|3.4289e-06|mbe:MBM_08324|ulp1 protease family protein; K08597 sentrin-specific protease 8 [EC:3.4.22.68] (A)	--	--	--	--	--	--	--	--
600	--	--	--	--	--	--	--	--	--	S	Function unknown	hypothetical protein M437DRAFT_80884 [Aureobasidium melanogenum CBS 110374]
984	--	--	Molecular Function: binding (GO:0005488);; Molecular Function: oxidoreductase activity (GO:0016491);;	--	--	--	--	--	Isotrichodermin C-15 hydroxylase GN=TRI11 OS=Fusarium sporotrichioides PE=3 SV=1	Q	Secondary metabolites biosynthesis, transport and catabolism	TPA: cytochrome P450, putative (Eurofung) [Aspergillus nidulans FGSC A4]
171	--	--	--	--	--	--	--	--	--	--	--	hypothetical protein ACLA_020580 [Aspergillus clavatus NRRL 1]
732	--	--	--	--	--	--	--	--	--	T	Signal transduction mechanisms	protein kinase [Histoplasma capsulatum G186AR]
537	--	--	--	--	--	--	--	--	--	S	Function unknown	hypothetical protein AFLA_068640 [Aspergillus flavus NRRL3357]
746	--	--	--	--	--	--	--	--	--	R	General function prediction only	hypothetical protein AFUB_080270 [Aspergillus fumigatus A1163]
965	--	--	Molecular Function: structural constituent of ribosome (GO:0003735);; Molecular Function: ATP binding (GO:0005524);; Cellular Component: ribosome (GO:0005840);; Biological Process: mismatch repair (GO:0006298);; Biological Process: translation (GO:0006412);; Molecular Function: mismatched DNA binding (GO:0030983);; Cellular Component: MutLalpha complex (GO:0032389);;	K02905|3.99924e-30|ang:ANI_1_626014|An01g04920; 60S ribosomal protein L29; K02905 large subunit ribosomal protein L29e (A)	../inputs/Monascus_purpureus.newGene.longest_transcript.fa.Kegg.pathway	[J]	Translation, ribosomal structure and biogenesis	Ribosomal L29e protein family	60S ribosomal protein L29 GN=YFR032BW OS=Saccharomyces cerevisiae (strain ATCC 204508 / S288c) PE=1 SV=3	J	Translation, ribosomal structure and biogenesis	60S ribosomal protein L29 [Aspergillus niger CBS 513.88]
35	--	--	Molecular Function: metallopeptidase activity (GO:0008237);;	--	--	[O]	Posttranslational modification, protein turnover, chaperones	Peptidase family M3;; Peptidase family M3	Saccharolysin GN=PRD1 OS=Saccharomyces cerevisiae (strain ATCC 204508 / S288c) PE=1 SV=1	O	Posttranslational modification, protein turnover, chaperones	hypothetical protein ANI_1_1274134 [Aspergillus niger CBS 513.88]
698	--	--	--	K11422|1.38631e-16|nfi:NFIA_051950|SET domain protein; K11422 histone-lysine N-methyltransferase SETD1 [EC:2.1.1.43] (A)	../inputs/Monascus_purpureus.newGene.longest_transcript.fa.Kegg.pathway	--	--	--	Histone-lysine N-methyltransferase, H3 lysine-4 specific GN=set1 OS=Neosartorya fumigata (strain ATCC MYA-4609 / Af293 / CBS 101355 / FGSC PE=3 SV=1	B	Chromatin structure and dynamics	hypothetical protein ATEG_07403 [Aspergillus terreus NIH2624]
291	--	--	Cellular Component: mitochondrion (GO:0005739);; Biological Process: phosphate-containing compound metabolic process (GO:0006796);; Molecular Function: NADH dehydrogenase (ubiquinone) activity (GO:0008137);; Molecular Function: transferase activity, transferring phosphorus-containing groups (GO:0016772);;	--	--	--	--	--	--	S	Function unknown	hypothetical protein AN0630.2 [Aspergillus nidulans FGSC A4]
559	[J]	Translation, ribosomal structure and biogenesis	Molecular Function: structural constituent of ribosome (GO:0003735);; Cellular Component: ribosome (GO:0005840);; Biological Process: translation (GO:0006412);; Molecular Function: metal ion binding (GO:0046872);;	K02978|4.38031e-33|ang:ANI_1_1226094|An11g09670; 40S ribosomal protein S27; K02978 small subunit ribosomal protein S27e (A)	../inputs/Monascus_purpureus.newGene.longest_transcript.fa.Kegg.pathway	[J]	Translation, ribosomal structure and biogenesis	Ribosomal protein S27	40S ribosomal protein S27 GN=crp-6 OS=Neurospora crassa (strain ATCC 24698 / 74-OR23-1A / CBS 708.71 / DSM PE=3 SV=1	J	Translation, ribosomal structure and biogenesis	putative CDP-alcohol phosphatidyltransferase class-I family protein C22A12.10 [Talaromyces marneffei PM1]
544	--	--	--	--	--	--	--	--	--	--	--	hypothetical protein TESG_05387 [Trichophyton tonsurans CBS 112818]
156	--	--	--	--	--	--	--	--	--	--	--	ubiquitination network signaling protein [Trichophyton rubrum CBS 118892]
297	--	--	Molecular Function: zinc ion binding (GO:0008270);; Molecular Function: oxidoreductase activity (GO:0016491);; Molecular Function: transferase activity, transferring acyl groups other than amino-acyl groups (GO:0016747);; Biological Process: oxidation-reduction process (GO:0055114);;	--	--	--	--	Acyl transferase domain;; Beta-ketoacyl synthase, C-terminal domain	Lovastatin diketide synthase LovF GN=lovF OS=Aspergillus terreus PE=1 SV=1	I	Lipid transport and metabolism	polyketide synthase, putative [Aspergillus clavatus NRRL 1]
1300	--	--	Biological Process: regulation of transcription, DNA-templated (GO:0006355);; Biological Process: transcription from RNA polymerase II promoter (GO:0006366);; Molecular Function: metal ion binding (GO:0046872);;	--	--	--	--	--	--	S	Function unknown	C6 transcription factor, putative [Penicillium digitatum Pd1]
1291	--	--	--	--	--	--	--	Tc5 transposase DNA-binding domain	--	S	Function unknown	Transposon, putative [Penicillium digitatum PHI26]
1089	--	--	--	--	--	--	--	--	--	--	--	hypothetical protein PAAG_11067 [Paracoccidioides sp. &apos;lutzii&apos; Pb01]
96	--	--	--	--	--	--	--	--	--	--	--	hypothetical protein V500_00166 [Pseudogymnoascus pannorum VKM F-4518 (FW-2643)]
644	[P]	Inorganic ion transport and metabolism	Molecular Function: potassium channel activity (GO:0005267);; Cellular Component: integral component of membrane (GO:0016021);; Biological Process: potassium ion transmembrane transport (GO:0071805);;	K05389|3.45779e-109|afv:AFLA_109850|potassium channel, putative; K05389 potassium channel subfamily K, other eukaryote (A)	--	[P]	Inorganic ion transport and metabolism	Ion channel	Outward-rectifier potassium channel TOK1 GN=TOK1 OS=Saccharomyces cerevisiae (strain ATCC 204508 / S288c) PE=1 SV=1	P	Inorganic ion transport and metabolism	tandem pore domain K+ channel [Aspergillus oryzae 3.042]
416	--	--	--	--	--	--	--	--	--	R	General function prediction only	Pc16g10620 [Penicillium rubens Wisconsin 54-1255]
17	--	--	Biological Process: amino acid transmembrane transport (GO:0003333);; Molecular Function: amino acid transmembrane transporter activity (GO:0015171);; Cellular Component: integral component of membrane (GO:0016021);;	--	--	--	--	--	--	E	Amino acid transport and metabolism	conserved hypothetical protein [Aspergillus terreus NIH2624]
475	--	--	--	--	--	--	--	--	--	--	--	telomere-associated RecQ helicase [Aspergillus fumigatus Af293]
567	--	--	Molecular Function: sequence-specific DNA binding RNA polymerase II transcription factor activity (GO:0000981);; Cellular Component: nucleus (GO:0005634);; Biological Process: regulation of transcription from RNA polymerase II promoter (GO:0006357);; Molecular Function: zinc ion binding (GO:0008270);; Molecular Function: transferase activity, transferring phosphorus-containing groups (GO:0016772)…	--	--	--	--	--	Altered inheritance of mitochondria protein 9, mitochondrial (Precursor) GN=AIM9 OS=Debaryomyces hansenii (strain ATCC 36239 / CBS 767 / JCM 1990 / NBRC PE=3 SV=2	S	Function unknown	conserved hypothetical protein [Aspergillus terreus NIH2624]
1163	--	--	--	--	--	--	--	F-box-like;; F-box domain	--	R	General function prediction only	TPA: F-box domain protein (AFU_orthologue; AFUA_1G14050) [Aspergillus nidulans FGSC A4]
994	[S]	Function unknown	--	--	--	--	--	Glutathione-dependent formaldehyde-activating enzyme	Uncharacterized lyase C29B12.13 GN=SPAC29B12.13 OS=Schizosaccharomyces pombe (strain 972 / ATCC 24843) PE=3 SV=1	S	Function unknown	hypothetical protein NFIA_057230 [Neosartorya fischeri NRRL 181]
555	--	--	Molecular Function: DNA binding (GO:0003677);; Molecular Function: metal ion binding (GO:0046872);;	--	--	--	--	--	--	S	Function unknown	predicted protein [Uncinocarpus reesii 1704]
779	--	--	Biological Process: DNA damage checkpoint (GO:0000077);; Biological Process: DNA repair (GO:0006281);; Cellular Component: checkpoint clamp complex (GO:0030896);;	K10994|4.46432e-20|aor:AOR_1_962054|DNA repair protein rad9; K10994 cell cycle checkpoint control protein RAD9A [EC:3.1.11.2] (A)	--	--	--	--	--	L	Replication, recombination and repair	putative DNA repair protein Rad9 [Aspergillus ruber CBS 135680]
790	--	--	Molecular Function: sequence-specific DNA binding RNA polymerase II transcription factor activity (GO:0000981);; Molecular Function: DNA binding (GO:0003677);; Cellular Component: nucleus (GO:0005634);; Biological Process: regulation of transcription from RNA polymerase II promoter (GO:0006357);; Molecular Function: zinc ion binding (GO:0008270);; Cellular Component: integral component of membran…	--	--	--	--	helix-turn-helix, Psq domain;; Tc5 transposase DNA-binding domain;; DDE superfamily endonuclease	--	S	Function unknown	pogo transposable element, putative [Talaromyces stipitatus ATCC 10500]
560	[J]	Translation, ribosomal structure and biogenesis	Molecular Function: structural constituent of ribosome (GO:0003735);; Cellular Component: ribosome (GO:0005840);; Biological Process: translation (GO:0006412);; Molecular Function: metal ion binding (GO:0046872);;	K02978|4.32656e-50|ang:ANI_1_1226094|An11g09670; 40S ribosomal protein S27; K02978 small subunit ribosomal protein S27e (A)	../inputs/Monascus_purpureus.newGene.longest_transcript.fa.Kegg.pathway	[J]	Translation, ribosomal structure and biogenesis	Ribosomal protein S27	40S ribosomal protein S27 GN=crp-6 OS=Neurospora crassa (strain ATCC 24698 / 74-OR23-1A / CBS 708.71 / DSM PE=3 SV=1	J	Translation, ribosomal structure and biogenesis	40S ribosomal protein S27 [Aspergillus niger CBS 513.88]
218	--	--	--	--	--	--	--	NAD(P)-binding Rossmann-like domain;; FAD dependent oxidoreductase;; FAD binding domain;; GMC oxidoreductase	Beta-cyclopiazonate dehydrogenase {ECO:0000305} (Precursor) OS=Aspergillus oryzae (Yellow koji mold) PE=1 SV=1	R	General function prediction only	CtnDup1 [Monascus ruber]
751	--	--	--	--	--	--	--	--	High-affinity glucose transporter GN=HGT1 OS=Candida albicans (Yeast) PE=3 SV=1	U	Intracellular trafficking, secretion, and vesicular transport	hypothetical protein GGTG_12402 [Gaeumannomyces graminis var. tritici R3-111a-1]
262	--	--	Molecular Function: transferase activity, transferring phosphorus-containing groups (GO:0016772);;	--	--	--	--	--	--	R	General function prediction only	phosphotransferase enzyme family protein [Aspergillus kawachii IFO 4308]
364	--	--	Molecular Function: RNA binding (GO:0003723);; Molecular Function: RNA-directed DNA polymerase activity (GO:0003964);; Molecular Function: RNA-DNA hybrid ribonuclease activity (GO:0004523);; Biological Process: RNA-dependent DNA replication (GO:0006278);;	--	--	--	--	--	Phosphate-repressible acid phosphatase (Precursor) GN=pacA OS=Aspergillus niger PE=3 SV=1	S	Function unknown	hypothetical protein FOXB_04922 [Fusarium oxysporum Fo5176]
504	--	--	--	--	--	--	--	--	--	S	Function unknown	hypothetical protein AOR_1_1492014 [Aspergillus oryzae RIB40]
529	--	--	Molecular Function: nucleic acid binding (GO:0003676);; Molecular Function: metal ion binding (GO:0046872);;	--	--	--	--	Zinc finger, C2H2 type;; BED zinc finger	--	S	Function unknown	Transposable element tc3 transposase, putative [Penicillium digitatum PHI26]
623	[Q]	Secondary metabolites biosynthesis, transport and catabolism	Biological Process: metabolic process (GO:0008152);; Molecular Function: transferase activity (GO:0016740);;	--	--	--	--	Beta-ketoacyl synthase, C-terminal domain;; Acyl transferase domain	Noranthrone synthase GN=pksL1 OS=Aspergillus parasiticus PE=1 SV=1	I	Lipid transport and metabolism	citrinin polyketide synthase [Monascus ruber]
254	--	--	--	--	--	--	--	--	--	R	General function prediction only	hypothetical protein ASPNIDRAFT_188158 [Aspergillus niger ATCC 1015]
1070	--	--	--	--	--	--	--	--	--	S	Function unknown	unnamed protein product [Penicillium roqueforti FM164]
825	--	--	--	--	--	--	--	--	--	S	Function unknown	hypothetical protein PDE_03992 [Penicillium oxalicum 114-2]
571	--	--	--	--	--	--	--	Tc5 transposase DNA-binding domain	--	S	Function unknown	hypothetical protein PITC_002450 [Penicillium italicum]
715	--	--	Molecular Function: DNA binding (GO:0003677);;	--	--	--	--	--	--	S	Function unknown	Probable transposable element [Penicillium roqueforti FM164]
908	--	--	Molecular Function: structural constituent of ribosome (GO:0003735);; Cellular Component: ribosome (GO:0005840);; Biological Process: translation (GO:0006412);;	K02983|3.4501e-22|fpu:FPSE_03967|hypothetical protein; K02983 small subunit ribosomal protein S30e (A)	../inputs/Monascus_purpureus.newGene.longest_transcript.fa.Kegg.pathway	[JO]	--	Ribosomal protein S30	40S ribosomal protein S30-B GN=RPS30B OS=Saccharomyces cerevisiae (strain ATCC 204508 / S288c) PE=1 SV=1	J	Translation, ribosomal structure and biogenesis	Putative 40S ribosomal protein S30 [Torrubiella hemipterigena]
1072	--	--	--	--	--	--	--	--	--	S	Function unknown	hypothetical protein PDIP_75160 [Penicillium digitatum Pd1]
1324	[GEPR]	Carbohydrate transport and metabolism;; Amino acid transport and metabolism;; Inorganic ion transport and metabolism;; General function prediction only	Cellular Component: integral component of membrane (GO:0016021);; Molecular Function: substrate-specific transmembrane transporter activity (GO:0022891);; Biological Process: transmembrane transport (GO:0055085);;	K08150|2.44538e-127|nhe:NECHADRAFT_93166|hypothetical protein; K08150 MFS transporter, SP family, solute carrier family 2 (myo-inositol transporter), member 13 (A)	--	[R]	General function prediction only	Sugar (and other) transporter;; Major Facilitator Superfamily	Myo-inositol transporter 1 GN=itr1 OS=Schizosaccharomyces pombe (strain 972 / ATCC 24843) PE=3 SV=1	R	General function prediction only	hypothetical protein V499_04075 [Pseudogymnoascus pannorum VKM F-103]
895	--	--	--	--	--	--	--	--	Uncharacterized endoplasmic reticulum membrane protein C1709.03 (Precursor) GN=SPBC1709.03 OS=Schizosaccharomyces pombe (strain 972 / ATCC 24843) PE=3 SV=2	S	Function unknown	hypothetical protein EURHEDRAFT_411632 [Aspergillus ruber CBS 135680]
449	[IQR]	Lipid transport and metabolism;; Secondary metabolites biosynthesis, transport and catabolism;; General function prediction only	--	--	--	--	--	--	--	R	General function prediction only	short-chain dehydrogenase, putative [Talaromyces stipitatus ATCC 10500]
512	--	--	--	--	--	--	--	--	--	--	--	hypothetical protein AKAW_06602 [Aspergillus kawachii IFO 4308]
1043	--	--	Molecular Function: binding (GO:0005488);; Biological Process: metabolic process (GO:0008152);; Molecular Function: hydrolase activity (GO:0016787);;	K01183|6.37353e-11|ani:AN5077.2|hypothetical protein; K01183 chitinase [EC:3.2.1.14] (A)	../inputs/Monascus_purpureus.newGene.longest_transcript.fa.Kegg.pathway	--	--	--	--	O	Posttranslational modification, protein turnover, chaperones	hypothetical protein EURHEDRAFT_147710 [Aspergillus ruber CBS 135680]
524	--	--	Molecular Function: binding (GO:0005488);;	--	--	--	--	--	--	R	General function prediction only	putative gag-pol poly protein [Eutypa lata UCREL1]
200	[I]	Lipid transport and metabolism	Molecular Function: acyl-CoA dehydrogenase activity (GO:0003995);; Molecular Function: flavin adenine dinucleotide binding (GO:0050660);; Biological Process: oxidation-reduction process (GO:0055114);;	--	--	--	--	Acyl-CoA dehydrogenase, C-terminal domain	--	I	Lipid transport and metabolism	Acyl-CoA dehydrogenase domain-containing protein [Scedosporium apiospermum]
1214	--	--	Biological Process: DNA metabolic process (GO:0006259);;	--	--	--	--	--	--	S	Function unknown	transposase [Fusarium oxysporum f. sp. melonis]
269	--	--	Molecular Function: binding (GO:0005488);; Molecular Function: transferase activity, transferring phosphorus-containing groups (GO:0016772);;	--	--	--	--	Phosphotransferase enzyme family	--	R	General function prediction only	conserved hypothetical protein [Blastomyces dermatitidis SLH14081]
322	--	--	--	--	--	--	--	--	--	--	--	hypothetical protein EURHEDRAFT_382268 [Aspergillus ruber CBS 135680]
770	[S]	Function unknown	Molecular Function: structural molecule activity (GO:0005198);; Biological Process: iron-sulfur cluster assembly (GO:0016226);; Molecular Function: iron-sulfur cluster binding (GO:0051536);;	--	--	[CU]	--	Iron-sulphur cluster biosynthesis	Iron-sulfur assembly protein 2 GN=ISA2 OS=Saccharomyces cerevisiae (strain ATCC 204508 / S288c) PE=1 SV=1	CU	Energy production and conversion;; Intracellular trafficking, secretion, and vesicular transport	iron-sulfur cluster assembly accessory protein Isa2, putative [Neosartorya fischeri NRRL 181]
1315	--	--	Molecular Function: nucleic acid binding (GO:0003676);; Biological Process: biosynthetic process (GO:0009058);; Molecular Function: transferase activity (GO:0016740);; Molecular Function: hydrolase activity, acting on ester bonds (GO:0016788);;	--	--	--	--	--	--	R	General function prediction only	reverse transcriptase [Monascus pilosus]
185	--	--	--	--	--	--	--	--	--	--	--	fatty acid synthase alpha subunit [Monascus pilosus]
729	--	--	Molecular Function: DNA binding (GO:0003677);; Biological Process: DNA metabolic process (GO:0006259);;	--	--	--	--	--	--	S	Function unknown	unnamed protein product [Aspergillus oryzae RIB40]
371	[Q]	Secondary metabolites biosynthesis, transport and catabolism	Biological Process: biosynthetic process (GO:0009058);; Molecular Function: transferase activity (GO:0016740);; Molecular Function: hydrolase activity, acting on ester bonds (GO:0016788);;	--	--	--	--	Thioesterase domain;; Phosphopantetheine attachment site;; Polyketide synthase dehydratase;; Thioesterase domain;; Phosphopantetheine attachment site;; Polyketide synthase dehydratase	Conidial yellow pigment biosynthesis polyketide synthase GN=wA OS=Emericella nidulans (strain FGSC A4 / ATCC 38163 / CBS 112.46 / NRRL PE=1 SV=2	I	Lipid transport and metabolism	polyketide synthase [Monascus purpureus]
995	--	--	Molecular Function: sequence-specific DNA binding RNA polymerase II transcription factor activity (GO:0000981);; Molecular Function: DNA binding (GO:0003677);; Cellular Component: nucleus (GO:0005634);; Biological Process: regulation of transcription from RNA polymerase II promoter (GO:0006357);; Molecular Function: zinc ion binding (GO:0008270);;	--	--	--	--	Fungal Zn(2)-Cys(6) binuclear cluster domain	--	K	Transcription	hypothetical protein HMPREF1541_01804 [Cyphellophora europaea CBS 101466]
441	--	--	Molecular Function: transferase activity, transferring phosphorus-containing groups (GO:0016772);; Biological Process: cellular metabolic process (GO:0044237);;	--	--	--	--	--	--	S	Function unknown	conserved hypothetical protein [Talaromyces stipitatus ATCC 10500]
877	--	--	--	K11484|4.47106e-12|pcs:Pc13g06620|Pc13g06620; K11484 histone deacetylase HOS3 [EC:3.5.1.98] (A)	--	--	--	--	--	BQ	Chromatin structure and dynamics;; Secondary metabolites biosynthesis, transport and catabolism	hypothetical protein PDIG_23280 [Penicillium digitatum PHI26]
1063	[KD]	Transcription;; Cell cycle control, cell division, chromosome partitioning	Biological Process: cellular bud site selection (GO:0000282);; Biological Process: mRNA splicing, via spliceosome (GO:0000398);; Cellular Component: U2 snRNP (GO:0005686);; Molecular Function: transferase activity (GO:0016740);;	K12873|3.8983e-100|afv:AFLA_048120|cell cycle control protein Cwf14/Bud31, putative; K12873 bud site selection protein 31 (A)	../inputs/Monascus_purpureus.newGene.longest_transcript.fa.Kegg.pathway	[K]	Transcription	G10 protein	Pre-mRNA-splicing factor cwf14 GN=cwf14 OS=Schizosaccharomyces pombe (strain 972 / ATCC 24843) PE=1 SV=1	K	Transcription	cell cycle control protein cwf14 [Aspergillus terreus NIH2624]
44	--	--	Molecular Function: nucleic acid binding (GO:0003676);; Molecular Function: transferase activity, transferring phosphorus-containing groups (GO:0016772);; Biological Process: cellular metabolic process (GO:0044237);;	--	--	--	--	--	--	R	General function prediction only	predicted protein [Aspergillus terreus NIH2624]
536	--	--	--	--	--	--	--	--	--	--	--	hypothetical protein An12g06790 [Aspergillus niger]
312	--	--	--	--	--	--	--	DDE superfamily endonuclease	--	S	Function unknown	hypothetical protein EURHEDRAFT_512883 [Aspergillus ruber CBS 135680]
461	--	--	Molecular Function: oxidoreductase activity (GO:0016491);; Biological Process: oxidation-reduction process (GO:0055114);;	--	--	--	--	--	--	R	General function prediction only	hypothetical protein PDE_09410 [Penicillium oxalicum 114-2]
672	--	--	--	--	--	--	--	--	--	S	Function unknown	hypothetical protein BA78_8463, partial [Aspergillus fumigatus var. RP-2014]
940	[RTKL]	General function prediction only;; Signal transduction mechanisms;; Transcription;; Replication, recombination and repair	Molecular Function: protein tyrosine kinase activity (GO:0004713);; Molecular Function: ATP binding (GO:0005524);; Biological Process: protein phosphorylation (GO:0006468);;	--	--	--	--	Protein kinase domain;; Protein tyrosine kinase	Spindle assembly checkpoint kinase GN=IPL1 OS=Yarrowia lipolytica (strain CLIB 122 / E 150) PE=3 SV=1	T	Signal transduction mechanisms	Pc12g13150 [Penicillium rubens Wisconsin 54-1255]
1341	--	--	--	--	--	--	--	--	--	--	--	hypothetical protein [Monascus ruber]
263	--	--	Molecular Function: methyltransferase activity (GO:0008168);;	--	--	--	--	--	--	S	Function unknown	hypothetical protein PMAA_092980 [Talaromyces marneffei ATCC 18224]
421	--	--	--	--	--	--	--	--	--	S	Function unknown	conserved hypothetical protein [Histoplasma capsulatum H88]
339	[I]	Lipid transport and metabolism	Molecular Function: magnesium ion binding (GO:0000287);; Biological Process: fatty acid biosynthetic process (GO:0006633);; Molecular Function: holo-[acyl-carrier-protein] synthase activity (GO:0008897);; Biological Process: macromolecule biosynthetic process (GO:0009059);; Biological Process: secondary metabolic process (GO:0019748);;	K00667|3.00106e-36|aor:AOR_1_184024|AO090010000107; 3-oxoacyl-[acyl-carrier-protein] synthase; K00667 fatty acid synthase subunit alpha, fungi type [EC:2.3.1.86] (A)	../inputs/Monascus_purpureus.newGene.longest_transcript.fa.Kegg.pathway	--	--	--	3-oxoacyl-[acyl-carrier-protein] synthase GN=fasA OS=Emericella nidulans (strain FGSC A4 / ATCC 38163 / CBS 112.46 / NRRL PE=2 SV=1	I	Lipid transport and metabolism	fatty acid synthase alpha subunit [Monascus pilosus]
252	--	--	--	--	--	--	--	--	--	S	Function unknown	hypothetical protein PDE_09145 [Penicillium oxalicum 114-2]
647	--	--	--	--	--	--	--	--	--	S	Function unknown	predicted protein [Aspergillus terreus NIH2624]
229	[G]	Carbohydrate transport and metabolism	Molecular Function: alpha-amylase activity (GO:0004556);; Molecular Function: calcium ion binding (GO:0005509);; Biological Process: carbohydrate catabolic process (GO:0016052);;	--	--	[G]	Carbohydrate transport and metabolism	Alpha amylase, catalytic domain	Alpha-amylase A type-3 (Precursor) GN=amy3 OS=Aspergillus oryzae (strain ATCC 42149 / RIB 40) PE=3 SV=1	G	Carbohydrate transport and metabolism	hypothetical protein TCE0_033r09409 [Talaromyces cellulolyticus]
119	--	--	--	--	--	--	--	--	--	S	Function unknown	hypothetical protein AOR_1_1210154 [Aspergillus oryzae RIB40]
1167	--	--	Molecular Function: urate oxidase activity (GO:0004846);; Cellular Component: peroxisome (GO:0005777);; Biological Process: purine nucleobase metabolic process (GO:0006144);; Biological Process: urate catabolic process (GO:0019628);; Biological Process: oxidation-reduction process (GO:0055114);;	--	--	[Q]	Secondary metabolites biosynthesis, transport and catabolism	--	Uricase GN=uaZ OS=Aspergillus flavus PE=1 SV=3	S	Function unknown	hypothetical protein PITC_035720 [Penicillium italicum]
51	[J]	Translation, ribosomal structure and biogenesis	Molecular Function: transferase activity (GO:0016740);;	--	--	[R]	General function prediction only	Ribosome associated membrane protein RAMP4	Probable mitochondrial N(5)-glutamine methyltransferase mtq1 GN=mtq1 OS=Schizosaccharomyces pombe (strain 972 / ATCC 24843) PE=3 SV=1	S	Function unknown	DNA methylase, N-6 adenine-specific, conserved site [Penicillium roqueforti FM164]
400	--	--	--	--	--	--	--	--	--	S	Function unknown	hypothetical protein PDE_08715 [Penicillium oxalicum 114-2]
671	--	--	Biological Process: transport (GO:0006810);;	--	--	[G]	Carbohydrate transport and metabolism	N2227-like protein	UPF0586 protein C1778.07 GN=SPBC1778.07 OS=Schizosaccharomyces pombe (strain 972 / ATCC 24843) PE=3 SV=1	G	Carbohydrate transport and metabolism	predicted protein [Aspergillus terreus NIH2624]
1002	--	--	--	K00100|1.96781e-15|mgr:MGG_12116|hypothetical protein; K00100 [EC:1.1.1.-] (A)	../inputs/Monascus_purpureus.newGene.longest_transcript.fa.Kegg.pathway	--	--	--	--	Q	Secondary metabolites biosynthesis, transport and catabolism	hypothetical protein A1O3_05532 [Capronia epimyces CBS 606.96]
469	[HC]	Coenzyme transport and metabolism;; Energy production and conversion	--	--	--	--	--	--	--	CH	Energy production and conversion;; Coenzyme transport and metabolism	Monooxygenase, FAD-binding [Penicillium expansum]
1346	--	--	Molecular Function: hydrolase activity, hydrolyzing O-glycosyl compounds (GO:0004553);; Biological Process: xylan catabolic process (GO:0045493);;	--	--	--	--	--	--	S	Function unknown	conserved hypothetical protein [Aspergillus terreus NIH2624]
1187	--	--	--	--	--	--	--	Domain of unknown function (DUF3328)	--	--	--	--
987	--	--	Molecular Function: nucleotide binding (GO:0000166);; Molecular Function: protein kinase activity (GO:0004672);; Biological Process: phosphorylation (GO:0016310);;	--	--	--	--	--	--	T	Signal transduction mechanisms	protein kinase [Histoplasma capsulatum G186AR]
154	--	--	Biological Process: transcription, DNA-templated (GO:0006351);;	--	--	--	--	--	--	K	Transcription	hypothetical protein VHEMI07347 [Torrubiella hemipterigena]
685	--	--	--	--	--	--	--	--	--	S	Function unknown	hypothetical protein ASPNIDRAFT_123131 [Aspergillus niger ATCC 1015]
439	--	--	Molecular Function: N-acetyltransferase activity (GO:0008080);; Molecular Function: transferase activity, transferring phosphorus-containing groups (GO:0016772);;	--	--	--	--	Acetyltransferase (GNAT) domain	--	R	General function prediction only	GNAT family acetyltransferase, putative [Aspergillus clavatus NRRL 1]
215	--	--	--	--	--	--	--	AT hook motif	--	--	--	--
112	[Q]	Secondary metabolites biosynthesis, transport and catabolism	Biological Process: metabolic process (GO:0008152);; Molecular Function: erythronolide synthase activity (GO:0047879);;	--	--	--	--	Male sterility protein;; Methyltransferase domain;; Methyltransferase domain;; Methyltransferase domain;; Methyltransferase domain	Lovastatin diketide synthase LovF GN=lovF OS=Aspergillus terreus PE=1 SV=1	Q	Secondary metabolites biosynthesis, transport and catabolism	conidial yellow pigment biosynthesis polyketide synthase [Monascus pilosus]
1059	--	--	--	--	--	--	--	--	--	S	Function unknown	hypothetical protein AN3473.2 [Aspergillus nidulans FGSC A4]
365	--	--	Molecular Function: hydrolase activity (GO:0016787);;	--	--	--	--	--	Phosphate-repressible acid phosphatase (Precursor) GN=pacA OS=Aspergillus niger PE=3 SV=1	R	General function prediction only	hypothetical protein FOXB_04922 [Fusarium oxysporum Fo5176]
714	--	--	Molecular Function: DNA binding (GO:0003677);; Molecular Function: microtubule motor activity (GO:0003777);; Molecular Function: aspartic-type endopeptidase activity (GO:0004190);; Cellular Component: kinesin complex (GO:0005871);; Biological Process: proteolysis (GO:0006508);;	--	--	--	--	--	--	S	Function unknown	hypothetical protein PDIP_86320 [Penicillium digitatum Pd1]
1140	--	--	Molecular Function: potassium ion transmembrane transporter activity (GO:0015079);; Cellular Component: membrane (GO:0016020);; Biological Process: potassium ion transmembrane transport (GO:0071805);;	K03549|3.59052e-58|mbe:MBM_02467|potassium transporter; K03549 KUP system potassium uptake protein (A)	--	--	--	K+ potassium transporter;; K+ potassium transporter	High affinity potassium transporter GN=HAK1 OS=Schwanniomyces occidentalis (Yeast) PE=3 SV=2	P	Inorganic ion transport and metabolism	potassium uptake protein [Capronia coronata CBS 617.96]
370	--	--	Molecular Function: transferase activity, transferring acyl groups (GO:0016746);; Biological Process: secondary metabolic process (GO:0019748);;	--	--	--	--	Beta-ketoacyl synthase, N-terminal domain;; Thiolase, N-terminal domain	Conidial yellow pigment biosynthesis polyketide synthase GN=wA OS=Emericella nidulans (strain FGSC A4 / ATCC 38163 / CBS 112.46 / NRRL PE=1 SV=2	Q	Secondary metabolites biosynthesis, transport and catabolism	non-reducing polyketide synthase, partial [Monascus purpureus]
109	[E]	Amino acid transport and metabolism	Biological Process: amino acid transmembrane transport (GO:0003333);; Molecular Function: amino acid transmembrane transporter activity (GO:0015171);; Cellular Component: integral component of membrane (GO:0016021);;	--	--	[E]	Amino acid transport and metabolism	Amino acid permease	Uncharacterized amino-acid permease C11D3.08c GN=SPAC11D3.08c OS=Schizosaccharomyces pombe (strain 972 / ATCC 24843) PE=3 SV=1	E	Amino acid transport and metabolism	GABA permease [Aspergillus niger CBS 513.88]
341	[Q]	Secondary metabolites biosynthesis, transport and catabolism	--	--	--	--	--	Condensation domain	Nonribosomal peptide synthetase 1 GN=NRPS1 OS=Neosartorya fumigata (strain ATCC MYA-4609 / Af293 / CBS 101355 / FGSC PE=1 SV=1	I	Lipid transport and metabolism	nonribosomal peptide synthase, putative [Aspergillus clavatus NRRL 1]
457	--	--	--	--	--	--	--	--	--	S	Function unknown	cytidylyltransferase [Aspergillus oryzae RIB40]
1085	--	--	Molecular Function: binding (GO:0005488);; Biological Process: transcription, DNA-templated (GO:0006351);;	--	--	--	--	--	--	--	--	Pc13g00970 [Penicillium rubens Wisconsin 54-1255]
301	[GEPR]	Carbohydrate transport and metabolism;; Amino acid transport and metabolism;; Inorganic ion transport and metabolism;; General function prediction only	Molecular Function: transporter activity (GO:0005215);; Cellular Component: integral component of membrane (GO:0016021);; Biological Process: transmembrane transport (GO:0055085);;	--	--	[R]	General function prediction only	Major Facilitator Superfamily;; Sugar (and other) transporter	Uncharacterized MFS-type transporter C1271.10c GN=SPBC1271.10c OS=Schizosaccharomyces pombe (strain 972 / ATCC 24843) PE=1 SV=1	R	General function prediction only	major facilitator superfamily transporter [Colletotrichum higginsianum]
511	[P]	Inorganic ion transport and metabolism	--	K03781|5.55558e-34|ang:ANI_1_1062124|An14g00690; catalase A; K03781 catalase [EC:1.11.1.6] (A)	../inputs/Monascus_purpureus.newGene.longest_transcript.fa.Kegg.pathway	--	--	GMC oxidoreductase	Catalase-1 GN=cat-1 OS=Neurospora crassa (strain ATCC 24698 / 74-OR23-1A / CBS 708.71 / DSM PE=1 SV=2	P	Inorganic ion transport and metabolism	unnamed protein product [Aspergillus niger]
99	--	--	--	--	--	--	--	Caulimovirus viroplasmin	--	S	Function unknown	hypothetical protein V495_06827 [Pseudogymnoascus pannorum VKM F-4514 (FW-929)]
587	--	--	Molecular Function: protein kinase activity (GO:0004672);; Molecular Function: ATP binding (GO:0005524);; Biological Process: protein phosphorylation (GO:0006468);;	--	--	--	--	--	--	S	Function unknown	conserved hypothetical protein [Aspergillus flavus NRRL3357]
558	[Q]	Secondary metabolites biosynthesis, transport and catabolism	--	K10253|8.18224e-70|ang:ANI_1_3304024|An02g13810; hypothetical protein; K10253 DOPA 4,5-dioxygenase [EC:1.14.99.-] (A)	--	--	--	Dopa 4,5-dioxygenase family	Uncharacterized 21.2 kDa protein OS=Botryotinia fuckeliana (Noble rot fungus) PE=2 SV=1	S	Function unknown	hypothetical protein EURHEDRAFT_411280 [Aspergillus ruber CBS 135680]
1149	--	--	--	--	--	--	--	--	--	R	General function prediction only	hypothetical protein PAAG_12641 [Paracoccidioides sp. &apos;lutzii&apos; Pb01]
979	[C]	Energy production and conversion	Molecular Function: 3-methyl-2-oxobutanoate dehydrogenase (2-methylpropanoyl-transferring) activity (GO:0003863);; Biological Process: oxidation-reduction process (GO:0055114);;	K00166|0|nfi:NFIA_054480|2-oxoisovalerate dehydrogenase complex alpha subunit, putative; K00166 2-oxoisovalerate dehydrogenase E1 component alpha subunit [EC:1.2.4.4] (A)	../inputs/Monascus_purpureus.newGene.longest_transcript.fa.Kegg.pathway	--	--	Dehydrogenase E1 component;; Dehydrogenase E1 component	Pyruvate dehydrogenase E1 component subunit alpha, mitochondrial (Precursor) GN=PDA1 OS=Kluyveromyces lactis (strain ATCC 8585 / CBS 2359 / DSM 70799 / NBRC PE=3 SV=2	C	Energy production and conversion	2-oxoisovalerate dehydrogenase complex alpha subunit, putative [Neosartorya fischeri NRRL 181]
830	--	--	--	--	--	--	--	--	--	R	General function prediction only	FluG domain protein [Neosartorya fischeri NRRL 181]
1270	[E]	Amino acid transport and metabolism	Molecular Function: asparaginase activity (GO:0004067);; Biological Process: asparagine metabolic process (GO:0006528);;	K01424|6.80871e-58|afm:AFUA_2G04280|asparaginase (EC:3.5.1.1); K01424 L-asparaginase [EC:3.5.1.1] (A)	../inputs/Monascus_purpureus.newGene.longest_transcript.fa.Kegg.pathway	--	--	Asparaginase	--	E	Amino acid transport and metabolism	asparaginase [Aspergillus fumigatus var. RP-2014]
750	--	--	--	--	--	--	--	--	--	S	Function unknown	hypothetical protein EURHEDRAFT_515067 [Aspergillus ruber CBS 135680]
1336	--	--	Molecular Function: protein kinase activity (GO:0004672);; Biological Process: phosphorylation (GO:0016310);;	--	--	--	--	--	--	T	Signal transduction mechanisms	protein kinase domain-containing protein [Metarhizium anisopliae]
533	[GEPR]	Carbohydrate transport and metabolism;; Amino acid transport and metabolism;; Inorganic ion transport and metabolism;; General function prediction only	Cellular Component: integral component of membrane (GO:0016021);; Biological Process: transmembrane transport (GO:0055085);;	--	--	[R]	General function prediction only	LysM domain	Uncharacterized MFS-type transporter C947.06c GN=SPBC947.06c OS=Schizosaccharomyces pombe (strain 972 / ATCC 24843) PE=3 SV=1	R	General function prediction only	hypothetical protein FOC4_g10001227 [Fusarium oxysporum f. sp. cubense race 4]
599	--	--	Molecular Function: hydrolase activity, hydrolyzing O-glycosyl compounds (GO:0004553);; Biological Process: cell wall macromolecule catabolic process (GO:0016998);;	--	--	--	--	LysM domain	--	G	Carbohydrate transport and metabolism	LysM domain-containing protein [Colletotrichum graminicola M1.001]
523	--	--	--	--	--	--	--	--	--	S	Function unknown	involucrin repeat protein, putative [Neosartorya fischeri NRRL 181]
888	--	--	Molecular Function: GTP binding (GO:0005525);; Biological Process: small GTPase mediated signal transduction (GO:0007264);; Biological Process: protein transport (GO:0015031);;	--	--	--	--	--	--	U	Intracellular trafficking, secretion, and vesicular transport	Small GTPase superfamily, Rab type [Penicillium expansum]
753	--	--	Biological Process: DNA metabolic process (GO:0006259);;	--	--	--	--	--	--	S	Function unknown	unnamed protein product [Aspergillus oryzae RIB40]
734	--	--	--	--	--	--	--	CVNH domain	Cyanovirin-N homolog {ECO:0000303|PubMed:18400178} GN=NCU05495 OS=Neurospora crassa (strain ATCC 24698 / 74-OR23-1A / CBS 708.71 / DSM PE=1 SV=2	S	Function unknown	cyanovirin-N family protein [Neosartorya fischeri NRRL 181]
510	[I]	Lipid transport and metabolism	Molecular Function: acetyl-CoA C-acyltransferase activity (GO:0003988);; Cellular Component: peroxisome (GO:0005777);; Biological Process: fatty acid metabolic process (GO:0006631);;	--	--	[I]	Lipid transport and metabolism	Thiolase, N-terminal domain;; Thiolase, C-terminal domain	3-ketoacyl-CoA thiolase, peroxisomal (Precursor) GN=POT1 OS=Yarrowia lipolytica (strain CLIB 122 / E 150) PE=3 SV=1	I	Lipid transport and metabolism	3-ketoacyl-CoA ketothiolase (Kat1) [Aspergillus fumigatus Af293]
424	--	--	Molecular Function: binding (GO:0005488);;	--	--	--	--	--	--	R	General function prediction only	hypothetical protein [Monascus ruber]
718	--	--	--	--	--	--	--	--	--	S	Function unknown	hypothetical protein ANI_1_700084 [Aspergillus niger CBS 513.88]
822	--	--	Biological Process: transcription, DNA-templated (GO:0006351);;	--	--	--	--	--	--	K	Transcription	Protein of unknown function DUF3468 [Penicillium italicum]
264	--	--	Molecular Function: methyltransferase activity (GO:0008168);;	--	--	--	--	--	--	S	Function unknown	hypothetical protein PMAA_092980 [Talaromyces marneffei ATCC 18224]
1213	--	--	--	--	--	--	--	--	--	S	Function unknown	transposase [Fusarium oxysporum f. sp. melonis]
805	--	--	--	--	--	--	--	--	--	S	Function unknown	predicted protein [Coccidioides immitis RS]
368	--	--	Biological Process: regulation of transcription, DNA-templated (GO:0006355);; Biological Process: transcription from RNA polymerase II promoter (GO:0006366);;	--	--	--	--	--	--	K	Transcription	hypothetical protein MGU_05114 [Metarhizium guizhouense ARSEF 977]
492	--	--	--	--	--	--	--	--	--	--	--	hypothetical protein V493_03045 [Pseudogymnoascus pannorum VKM F-4281 (FW-2241)]
792	--	--	--	--	--	--	--	--	--	S	Function unknown	hypothetical protein AOR_1_1320184 [Byssochlamys spectabilis No. 5]
506	--	--	Molecular Function: nucleic acid binding (GO:0003676);;	--	--	--	--	--	--	S	Function unknown	transposase [Aspergillus fumigatus]
1333	--	--	--	--	--	--	--	--	--	S	Function unknown	hypothetical protein AKAW_11007 [Aspergillus kawachii IFO 4308]
1206	--	--	Cellular Component: endoplasmic reticulum membrane (GO:0005789);; Biological Process: ER to Golgi vesicle-mediated transport (GO:0006888);; Cellular Component: ER to Golgi transport vesicle (GO:0030134);; Cellular Component: integral component of Golgi membrane (GO:0030173);;	--	--	[S]	Function unknown	--	Protein transport protein YOS1 GN=YOS1 OS=Saccharomyces cerevisiae (strain ATCC 204508 / S288c) PE=1 SV=1	S	Function unknown	unnamed protein product [Aspergillus niger]
216	--	--	--	--	--	--	--	--	--	Q	Secondary metabolites biosynthesis, transport and catabolism	short-chain dehydrogenase [Aspergillus kawachii IFO 4308]
963	--	--	--	--	--	--	--	--	--	--	--	hypothetical protein PDE_10013 [Penicillium oxalicum 114-2]
700	--	--	Molecular Function: RNA polymerase II transcription cofactor activity (GO:0001104);; Biological Process: regulation of transcription from RNA polymerase II promoter (GO:0006357);; Cellular Component: mediator complex (GO:0016592);;	K15151|3.60757e-48|pcs:Pc13g02400|Pc13g02400; K15151 mediator of RNA polymerase II transcription subunit 10 (A)	--	[K]	Transcription	--	Mediator of RNA polymerase II transcription subunit 10 GN=nut2 OS=Aspergillus terreus (strain NIH 2624 / FGSC A1156) PE=3 SV=1	K	Transcription	Mediator of RNA polymerase II transcription subunit 10 [Penicillium roqueforti FM164]
37	--	--	Molecular Function: transferase activity, transferring phosphorus-containing groups (GO:0016772);;	--	--	--	--	NRDE protein	--	R	General function prediction only	Aminoglycoside phosphotransferase [Penicillium italicum]
111	[L]	Replication, recombination and repair	Molecular Function: ATP binding (GO:0005524);; Biological Process: mismatch repair (GO:0006298);; Molecular Function: mismatched DNA binding (GO:0030983);;	K08740|1.37205e-100|nfi:NFIA_022650|DNA mismatch repair protein Msh4, putative; K08740 DNA mismatch repair protein MSH4 (A)	--	[L]	Replication, recombination and repair	MutS domain II	MutS protein homolog 4 GN=MSH4 OS=Saccharomyces cerevisiae (strain ATCC 204508 / S288c) PE=1 SV=2	L	Replication, recombination and repair	DNA mismatch repair protein Msh4, putative [Neosartorya fischeri NRRL 181]
646	--	--	--	--	--	--	--	--	--	S	Function unknown	predicted protein [Aspergillus terreus NIH2624]
186	--	--	Molecular Function: transferase activity, transferring phosphorus-containing groups (GO:0016772);;	--	--	--	--	--	--	R	General function prediction only	Aminoglycoside phosphotransferase [Penicillium italicum]
285	--	--	--	--	--	--	--	--	--	--	--	putative mfs protein [Eutypa lata UCREL1]
813	--	--	--	--	--	--	--	--	--	--	--	conserved hypothetical protein [Byssochlamys spectabilis No. 5]
1168	[S]	Function unknown	Molecular Function: oxidoreductase activity (GO:0016491);; Molecular Function: transition metal ion binding (GO:0046914);; Molecular Function: 2 iron, 2 sulfur cluster binding (GO:0051537);; Biological Process: oxidation-reduction process (GO:0055114);;	--	--	--	--	Protein of unknown function (DUF455);; Rieske [2Fe-2S] domain	--	S	Function unknown	hypothetical protein BA78_5747 [Aspergillus fumigatus var. RP-2014]
535	--	--	--	--	--	--	--	--	--	S	Function unknown	hypothetical protein ANI_1_2012104 [Aspergillus niger CBS 513.88]
1147	--	--	--	--	--	--	--	--	--	S	Function unknown	hypothetical protein [Penicillium rubens Wisconsin 54-1255]
440	--	--	Molecular Function: kinase activity (GO:0016301);; Biological Process: phosphorylation (GO:0016310);; Molecular Function: phosphotransferase activity, alcohol group as acceptor (GO:0016773);; Biological Process: primary metabolic process (GO:0044238);; Biological Process: cellular macromolecule metabolic process (GO:0044260);;	--	--	--	--	--	--	S	Function unknown	conserved hypothetical protein [Talaromyces stipitatus ATCC 10500]
1084	--	--	--	--	--	--	--	--	--	S	Function unknown	hypothetical protein V492_00132 [Pseudogymnoascus pannorum VKM F-4246]
609	--	--	--	--	--	--	--	--	--	S	Function unknown	hypothetical protein Ao3042_04013 [Aspergillus oryzae 3.042]
1021	--	--	--	--	--	--	--	--	--	R	General function prediction only	phosphotransferase enzyme family protein [Aspergillus niger CBS 513.88]
703	--	--	Molecular Function: binding (GO:0005488);; Biological Process: transcription, DNA-templated (GO:0006351);;	--	--	--	--	helix-turn-helix, Psq domain	--	S	Function unknown	DDE-domain-containing protein [Aspergillus ruber CBS 135680]
1105	--	--	--	--	--	--	--	--	--	S	Function unknown	hypothetical protein ANI_1_1634064 [Aspergillus niger CBS 513.88]
434	--	--	--	--	--	--	--	--	--	S	Function unknown	conserved hypothetical protein [Histoplasma capsulatum H143]
1298	--	--	Biological Process: regulation of transcription, DNA-templated (GO:0006355);; Biological Process: transcription from RNA polymerase II promoter (GO:0006366);; Molecular Function: metal ion binding (GO:0046872);;	--	--	--	--	--	--	S	Function unknown	C6 transcription factor, putative [Penicillium digitatum Pd1]
314	--	--	Biological Process: metabolic process (GO:0008152);; Molecular Function: oxidoreductase activity (GO:0016491);;	--	--	--	--	--	--	S	Function unknown	hypothetical protein AOR_1_774024 [Aspergillus oryzae RIB40]
1282	--	--	Cellular Component: cytoplasm (GO:0005737);; Cellular Component: microtubule organizing center (GO:0005815);; Cellular Component: spindle (GO:0005819);;	K18633|1.99708e-26|ang:ANI_1_1614074|An08g00780; mitotic-spindle organizing protein associated with a ring of gamma-tubulin 1; K18633 mitotic-spindle organizing protein 1 (A)	--	--	--	Mitotic-spindle organizing gamma-tubulin ring associated	Mitotic-spindle organizing protein 1 GN=AN1361 OS=Emericella nidulans (strain FGSC A4 / ATCC 38163 / CBS 112.46 / NRRL PE=3 SV=1	Z	Cytoskeleton	mitotic-spindle organizing protein associated with a ring of gamma-tubulin 1 [Aspergillus niger CBS 513.88]
179	[GEPR]	Carbohydrate transport and metabolism;; Amino acid transport and metabolism;; Inorganic ion transport and metabolism;; General function prediction only	Molecular Function: inorganic phosphate transmembrane transporter activity (GO:0005315);; Biological Process: phosphate ion transport (GO:0006817);; Molecular Function: chitin binding (GO:0008061);; Cellular Component: integral component of membrane (GO:0016021);; Biological Process: transmembrane transport (GO:0055085);;	K08176|0|act:ACLA_054810|phosphate:H+ symporter; K08176 MFS transporter, PHS family, inorganic phosphate transporter (A)	--	[P]	Inorganic ion transport and metabolism	Sugar (and other) transporter;; Major Facilitator Superfamily	Repressible high-affinity phosphate permease {ECO:0000303|PubMed:7883177} OS=Neurospora crassa (strain ATCC 24698 / 74-OR23-1A / CBS 708.71 / DSM PE=1 SV=2	P	Inorganic ion transport and metabolism	phosphate:H+ symporter [Aspergillus clavatus NRRL 1]
1029	--	--	--	--	--	--	--	--	--	S	Function unknown	hypothetical protein NFIA_105620 [Neosartorya fischeri NRRL 181]
284	--	--	--	K15173|2.92111e-16|cpw:CPC735_001690|SNF2 family N-terminal domain containing protein; K15173 transcription termination factor 2 [EC:3.6.4.-] (A)	--	--	--	--	--	R	General function prediction only	SNF2 family N-terminal domain containing protein [Coccidioides posadasii C735 delta SOWgp]
7	--	--	--	--	--	--	--	--	--	S	Function unknown	prenylcysteine lyase [Byssochlamys spectabilis No. 5]
726	--	--	--	--	--	--	--	--	--	S	Function unknown	hypothetical protein NFIA_017440 [Neosartorya fischeri NRRL 181]
1096	--	--	--	--	--	--	--	--	--	S	Function unknown	predicted protein [Uncinocarpus reesii 1704]
138	--	--	--	--	--	--	--	--	--	S	Function unknown	rhodopsin family protein [Aspergillus niger CBS 513.88]
1361	--	--	--	--	--	--	--	--	--	S	Function unknown	hypothetical protein AOR_1_1136144 [Aspergillus oryzae RIB40]
659	--	--	Molecular Function: zinc ion binding (GO:0008270);;	--	--	--	--	Zinc finger, C3HC4 type (RING finger);; Ring finger domain;; Zinc finger, C3HC4 type (RING finger);; Zinc finger, C3HC4 type (RING finger);; zinc finger of C3HC4-type, RING;; zinc-RING finger domain	--	O	Posttranslational modification, protein turnover, chaperones	conserved hypothetical protein [Aspergillus flavus NRRL3357]
448	--	--	--	--	--	--	--	Methyltransferase domain;; Methyltransferase domain;; Methyltransferase domain;; Methyltransferase domain	--	R	General function prediction only	hypothetical protein NECHADRAFT_62655 [Nectria haematococca mpVI 77-13-4]
874	[R]	General function prediction only	Molecular Function: hydrolase activity (GO:0016787);;	--	--	--	--	Carbon-nitrogen hydrolase	Cyanide hydratase GN=CHT OS=Gloeocercospora sorghi (Zonate leaf spot disease fungus) PE=3 SV=1	R	General function prediction only	hypothetical protein CH063_11156 [Colletotrichum higginsianum]
517	--	--	Biological Process: single-organism process (GO:0044699);;	--	--	--	--	Triose-phosphate Transporter family	--	EG	Amino acid transport and metabolism;; Carbohydrate transport and metabolism	DUF250 domain membrane protein [Aspergillus kawachii IFO 4308]
1327	--	--	Biological Process: cellular process (GO:0009987);;	--	--	--	--	Signal recognition particle 9 kDa protein (SRP9)	Uncharacterized protein C17H9.07 GN=SPAC17H9.07 OS=Schizosaccharomyces pombe (strain 972 / ATCC 24843) PE=4 SV=1	S	Function unknown	Pc21g07520 [Penicillium rubens Wisconsin 54-1255]
242	--	--	--	--	--	--	--	--	--	S	Function unknown	hypothetical protein AOR_1_176114 [Aspergillus oryzae RIB40]
881	--	--	--	--	--	--	--	--	--	S	Function unknown	conserved hypothetical protein [Talaromyces stipitatus ATCC 10500]
241	--	--	--	--	--	--	--	--	--	--	--	hypothetical protein A1O3_09761 [Capronia epimyces CBS 606.96]
573	--	--	Molecular Function: DNA binding (GO:0003677);; Molecular Function: zinc ion binding (GO:0008270);;	--	--	--	--	--	--	R	General function prediction only	Pc21g14500 [Penicillium rubens Wisconsin 54-1255]
1350	--	--	--	--	--	--	--	--	--	P	Inorganic ion transport and metabolism	hypothetical protein NCU05157 [Byssochlamys spectabilis No. 5]
1262	--	--	--	--	--	--	--	SNARE-complex protein Syntaxin-18 N-terminus	--	S	Function unknown	SNARE protein (Ufe1), putative [Byssochlamys spectabilis No. 5]
982	--	--	Molecular Function: binding (GO:0005488);; Molecular Function: oxidoreductase activity (GO:0016491);;	--	--	--	--	Cytochrome P450	Isotrichodermin C-15 hydroxylase GN=TRI11 OS=Fusarium sporotrichioides PE=3 SV=1	Q	Secondary metabolites biosynthesis, transport and catabolism	TPA: cytochrome P450, putative (Eurofung) [Aspergillus nidulans FGSC A4]
345	--	--	--	--	--	--	--	--	--	S	Function unknown	hypothetical protein AOR_1_1220184 [Aspergillus oryzae RIB40]
903	--	--	Molecular Function: transferase activity, transferring phosphorus-containing groups (GO:0016772);;	--	--	--	--	--	--	S	Function unknown	conserved hypothetical protein [Histoplasma capsulatum G186AR]
271	[S]	Function unknown	Cellular Component: plasma membrane (GO:0005886);; Biological Process: ethanol catabolic process (GO:0006068);; Biological Process: plasma membrane acetate transport (GO:0006847);; Molecular Function: acetate transmembrane transporter activity (GO:0015123);; Cellular Component: integral component of membrane (GO:0016021);; Biological Process: acetate biosynthetic process (GO:0019413);; Cellular C…	--	--	--	--	GPR1/FUN34/yaaH family	Protein alcS OS=Neosartorya fumigata (strain ATCC MYA-4609 / Af293 / CBS 101355 / FGSC PE=3 SV=1	S	Function unknown	TPA: TPA_inf: GPR1/FUN34/YaaH-class plasma membrane protein [Neosartorya fischeri]
1217	--	--	--	--	--	--	--	--	Uncharacterized protein tam6, mitochondrial GN=tam6 OS=Schizosaccharomyces pombe (strain 972 / ATCC 24843) PE=2 SV=1	S	Function unknown	hypothetical protein ANI_1_1246014 [Aspergillus niger CBS 513.88]
212	--	--	--	--	--	--	--	14-3-3 protein	--	S	Function unknown	conserved hypothetical protein [Aspergillus fumigatus Af293]
191	--	--	--	--	--	--	--	helix-turn-helix, Psq domain	--	S	Function unknown	TPA: conserved hypothetical protein [Aspergillus nidulans FGSC A4]
1212	--	--	Biological Process: DNA metabolic process (GO:0006259);;	--	--	--	--	Transposase;; Winged helix-turn helix;; Homeodomain-like domain	--	S	Function unknown	conserved hypothetical protein [Talaromyces stipitatus ATCC 10500]
110	--	--	Molecular Function: DNA binding (GO:0003677);; Molecular Function: isomerase activity (GO:0016853);; Molecular Function: metal ion binding (GO:0046872);;	K15223|1.72738e-35|act:ACLA_032490|SWIB/MDM2 domain protein; K15223 upstream activation factor subunit UAF30 (A)	--	--	--	--	--	O	Posttranslational modification, protein turnover, chaperones	SWIB/MDM2 domain protein [Aspergillus clavatus NRRL 1]
1142	--	--	--	--	--	--	--	--	--	S	Function unknown	hypothetical protein AOR_1_250124 [Aspergillus oryzae RIB40]
552	[E]	Amino acid transport and metabolism	Biological Process: alcohol metabolic process (GO:0006066);; Molecular Function: choline dehydrogenase activity (GO:0008812);; Molecular Function: glucose oxidase activity (GO:0046562);; Molecular Function: flavin adenine dinucleotide binding (GO:0050660);; Biological Process: oxidation-reduction process (GO:0055114);;	--	--	--	--	GMC oxidoreductase	Glucose oxidase OS=Penicillium amagasakiense PE=1 SV=1	R	General function prediction only	glucose oxidase [Aspergillus niger CBS 513.88]
107	[KL]	Transcription;; Replication, recombination and repair	Molecular Function: DNA binding (GO:0003677);; Molecular Function: helicase activity (GO:0004386);; Molecular Function: ATP binding (GO:0005524);;	K10841|0|afm:AFUA_4G03840|DNA repair protein Rhp26/Rad26; K10841 DNA excision repair protein ERCC-6 (A)	../inputs/Monascus_purpureus.newGene.longest_transcript.fa.Kegg.pathway	[KL]	--	SNF2 family N-terminal domain;; Type III restriction enzyme, res subunit	DNA repair protein rhp26 GN=rhp26 OS=Schizosaccharomyces pombe (strain 972 / ATCC 24843) PE=3 SV=1	L	Replication, recombination and repair	DNA repair protein Rhp26/Rad26 [Aspergillus fumigatus Af293]
460	--	--	Molecular Function: protein serine/threonine kinase activity (GO:0004674);; Molecular Function: ATP binding (GO:0005524);; Biological Process: protein phosphorylation (GO:0006468);; Cellular Component: integral component of membrane (GO:0016021);; Molecular Function: oxidoreductase activity (GO:0016491);; Biological Process: oxidation-reduction process (GO:0055114);;	--	--	--	--	Protein kinase domain	Protein kinase dsk1 GN=dsk1 OS=Schizosaccharomyces pombe (strain 972 / ATCC 24843) PE=3 SV=2	T	Signal transduction mechanisms	hypothetical protein NFIA_060690 [Neosartorya fischeri NRRL 181]
731	--	--	--	--	--	--	--	--	--	S	Function unknown	conserved hypothetical protein [Paracoccidioides sp. &apos;lutzii&apos; Pb01]
1322	--	--	Molecular Function: catalytic activity (GO:0003824);; Molecular Function: metal ion binding (GO:0046872);;	--	--	--	--	--	--	R	General function prediction only	hypothetical protein NFIA_005060 [Neosartorya fischeri NRRL 181]
265	--	--	--	--	--	--	--	--	--	S	Function unknown	hypothetical protein PITC_061100 [Penicillium italicum]
561	--	--	--	--	--	--	--	Tetratricopeptide repeat;; Tetratricopeptide repeat;; Tetratricopeptide repeat;; TPR repeat;; Tetratricopeptide repeat	--	R	General function prediction only	NB-ARC and TPR domain protein [Talaromyces stipitatus ATCC 10500]
153	--	--	--	K05920|2.19982e-72|afm:AFUA_1G00350|metalloreductase (EC:1.16.1.-); K05920 [EC:1.16.1.-] (A)	--	--	--	FAD-binding domain	--	S	Function unknown	Ferric/cupric reductase transmembrane component 1 [Talaromyces marneffei PM1]
1363	--	--	--	--	--	--	--	--	--	S	Function unknown	hypothetical protein FVEG_07041 [Fusarium verticillioides 7600]
36	--	--	Biological Process: translation (GO:0006412);; Molecular Function: transferase activity, transferring phosphorus-containing groups (GO:0016772);; Molecular Function: ligase activity (GO:0016874);;	--	--	--	--	--	--	S	Function unknown	hypothetical protein ACLA_061040 [Aspergillus clavatus NRRL 1]
681	--	--	--	--	--	--	--	--	--	S	Function unknown	predicted protein [Aspergillus terreus NIH2624]
1272	--	--	Biological Process: mitotic spindle organization in nucleus (GO:0030472);; Cellular Component: DASH complex (GO:0042729);; Cellular Component: mitotic spindle (GO:0072686);;	K11567|7.00621e-42|aor:AOR_1_2896174|AO090005001648; DASH complex subunit DAD2; K11567 DASH complex subunit DAD2 (A)	--	--	--	DASH complex subunit Dad2	DASH complex subunit DAD2 GN=DAD2 OS=Debaryomyces hansenii (strain ATCC 36239 / CBS 767 / JCM 1990 / NBRC PE=3 SV=2	S	Function unknown	DASH complex subunit DAD2 [Aspergillus oryzae RIB40]
957	--	--	--	--	--	--	--	--	--	--	--	unnamed protein product [Aspergillus niger]
1208	[UR]	Intracellular trafficking, secretion, and vesicular transport;; General function prediction only	Biological Process: cell communication (GO:0007154);; Molecular Function: phosphatidylinositol binding (GO:0035091);;	K17917|0|ang:ANI_1_1114014|An01g08400; sorting nexin 3; K17917 sorting nexin-1/2 (A)	--	[U]	Intracellular trafficking, secretion, and vesicular transport	Vps5 C terminal like	Vacuolar protein sorting-associated protein vps5 GN=vps5 OS=Schizosaccharomyces pombe (strain 972 / ATCC 24843) PE=1 SV=1	U	Intracellular trafficking, secretion, and vesicular transport	sorting nexin 3 [Aspergillus niger CBS 513.88]
405	--	--	Biological Process: metabolic process (GO:0008152);;	--	--	--	--	--	--	G	Carbohydrate transport and metabolism	conserved hypothetical protein [Aspergillus terreus NIH2624]
829	--	--	--	--	--	--	--	--	--	S	Function unknown	hypothetical protein [Penicillium rubens Wisconsin 54-1255]
1357	--	--	Cellular Component: integral component of membrane (GO:0016021);;	--	--	--	--	Transmembrane proteins 14C	--	S	Function unknown	hypothetical protein NFIA_020950 [Neosartorya fischeri NRRL 181]
1123	--	--	--	--	--	--	--	--	--	S	Function unknown	hypothetical protein EURHEDRAFT_378794 [Aspergillus ruber CBS 135680]
164	--	--	--	--	--	--	--	HNH endonuclease	--	S	Function unknown	hypothetical protein BDFG_02159 [Blastomyces dermatitidis ATCC 26199]
388	--	--	Molecular Function: serine-type endopeptidase activity (GO:0004252);; Molecular Function: identical protein binding (GO:0042802);; Biological Process: negative regulation of catalytic activity (GO:0043086);;	--	--	--	--	Peptidase inhibitor I9	--	S	Function unknown	hypothetical protein A1O3_02753 [Capronia epimyces CBS 606.96]
1202	--	--	--	--	--	--	--	4F5 protein family	--	S	Function unknown	Pc22g16980 [Penicillium rubens Wisconsin 54-1255]
855	--	--	--	--	--	--	--	--	--	S	Function unknown	hypothetical protein AKAW_11007 [Aspergillus kawachii IFO 4308]
682	[K]	Transcription	Molecular Function: DNA binding (GO:0003677);; Molecular Function: DNA-directed RNA polymerase activity (GO:0003899);; Biological Process: transcription, DNA-templated (GO:0006351);; Molecular Function: zinc ion binding (GO:0008270);;	K03007|1.19736e-41|aor:AOR_1_1386084|DNA-directed RNA polymerases I, II, and III subunit RPABC5; K03007 DNA-directed RNA polymerases I, II, and III subunit RPABC5 (A)	../inputs/Monascus_purpureus.newGene.longest_transcript.fa.Kegg.pathway	[K]	Transcription	RNA polymerases N / 8 kDa subunit	DNA-directed RNA polymerases I, II, and III subunit RPABC5 GN=rpb10 OS=Schizosaccharomyces pombe (strain 972 / ATCC 24843) PE=1 SV=2	K	Transcription	DNA-directed RNA polymerases I, II, and III subunit RPABC5 [Aspergillus oryzae RIB40]
1087	--	--	--	--	--	--	--	--	--	S	Function unknown	hypothetical protein ASPNIDRAFT_41214 [Aspergillus niger ATCC 1015]
1302	--	--	--	--	--	--	--	--	--	R	General function prediction only	Pc12g09450 [Penicillium rubens Wisconsin 54-1255]
76	[O]	Posttranslational modification, protein turnover, chaperones	--	--	--	--	--	Rdx family	--	O	Posttranslational modification, protein turnover, chaperones	hypothetical protein PAAG_00818 [Byssochlamys spectabilis No. 5]
295	--	--	--	--	--	--	--	NACHT domain	--	R	General function prediction only	NACHT nucleoside triphosphatase [Penicillium roqueforti FM164]
62	--	--	--	--	--	--	--	Protein of unknown function (DUF2422)	--	S	Function unknown	conserved hypothetical protein [Aspergillus terreus NIH2624]
1280	--	--	Molecular Function: DNA binding (GO:0003677);; Molecular Function: zinc ion binding (GO:0008270);;	--	--	--	--	--	--	S	Function unknown	conserved hypothetical protein [Aspergillus terreus NIH2624]
251	--	--	--	--	--	--	--	--	--	S	Function unknown	hypothetical protein PDE_09145 [Penicillium oxalicum 114-2]
636	--	--	--	--	--	--	--	--	--	S	Function unknown	hypothetical protein AFUB_071480 [Aspergillus fumigatus A1163]
1075	--	--	Cellular Component: fungal-type vacuole membrane (GO:0000329);; Biological Process: invasive growth in response to glucose limitation (GO:0001403);; Cellular Component: endosome (GO:0005768);; Biological Process: cellular copper ion homeostasis (GO:0006878);; Biological Process: vacuolar transport (GO:0007034);; Biological Process: pseudohyphal growth (GO:0007124);; Cellular Component: integral c…	K17086|0|afm:AFUA_6G14250|endosomal integral membrane protein (P24a); K17086 transmembrane 9 superfamily member 2/4 (A)	--	[U]	Intracellular trafficking, secretion, and vesicular transport	Endomembrane protein 70	Protein p24a (Precursor) OS=Saccharomyces cerevisiae (strain ATCC 204508 / S288c) PE=1 SV=2	U	Intracellular trafficking, secretion, and vesicular transport	endosomal integral membrane protein P24a [Aspergillus fumigatus var. RP-2014]
466	--	--	--	--	--	--	--	--	--	S	Function unknown	hypothetical protein V502_04103 [Pseudogymnoascus pannorum VKM F-4520 (FW-2644)]
1265	--	--	--	--	--	[BD]	--	--	CENP-B homolog protein 1 GN=cbh1 OS=Schizosaccharomyces pombe (strain 972 / ATCC 24843) PE=1 SV=2	BD	Chromatin structure and dynamics;; Cell cycle control, cell division, chromosome partitioning	jerky [Aspergillus kawachii IFO 4308]
187	[R]	General function prediction only	--	--	--	--	--	Bacteriorhodopsin-like protein	Protein YRO2 GN=YRO2 OS=Saccharomyces cerevisiae (strain ATCC 204508 / S288c) PE=1 SV=1	S	Function unknown	hypothetical protein A1O5_04943 [Cladophialophora psammophila CBS 110553]
875	--	--	--	--	--	--	--	--	--	S	Function unknown	Double-stranded RNA-binding-like [Penicillium roqueforti FM164]
1081	--	--	--	--	--	--	--	Transcription factor IIIC subunit delta N-term	--	S	Function unknown	unnamed protein product [Aspergillus niger]
824	--	--	--	--	--	--	--	--	--	S	Function unknown	Transposable element tc3 transposase, putative [Penicillium digitatum PHI26]
93	--	--	--	--	--	--	--	Ferric reductase like transmembrane component	--	S	Function unknown	predicted protein [Histoplasma capsulatum NAm1]
494	--	--	--	--	--	--	--	--	--	R	General function prediction only	C2H2 finger domain protein [Aspergillus fumigatus A1163]
658	--	--	--	--	--	--	--	--	--	S	Function unknown	conserved hypothetical protein [Histoplasma capsulatum H88]
63	--	--	Molecular Function: sequence-specific DNA binding RNA polymerase II transcription factor activity (GO:0000981);; Molecular Function: DNA binding (GO:0003677);; Cellular Component: nucleus (GO:0005634);; Biological Process: regulation of transcription from RNA polymerase II promoter (GO:0006357);; Molecular Function: zinc ion binding (GO:0008270);; Cellular Component: integral component of membran…	--	--	--	--	DDE superfamily endonuclease	--	S	Function unknown	transposase [Aspergillus fumigatus]
227	[GHR]	Carbohydrate transport and metabolism;; Coenzyme transport and metabolism;; General function prediction only	Molecular Function: magnesium ion binding (GO:0000287);; Molecular Function: pyruvate decarboxylase activity (GO:0004737);; Molecular Function: thiamine pyrophosphate binding (GO:0030976);; Biological Process: ethanol biosynthetic process involved in glucose fermentation to ethanol (GO:0043458);;	K01568|4.01973e-24|cim:CIMG_03789|hypothetical protein; K01568 pyruvate decarboxylase [EC:4.1.1.1] (A)	../inputs/Monascus_purpureus.newGene.longest_transcript.fa.Kegg.pathway	--	--	Thiamine pyrophosphate enzyme, N-terminal TPP binding domain	Pyruvate decarboxylase GN=pdcA OS=Neosartorya fumigata (strain ATCC MYA-4609 / Af293 / CBS 101355 / FGSC PE=3 SV=1	H	Coenzyme transport and metabolism	hypothetical protein CIMG_03789 [Coccidioides immitis RS]
518	--	--	--	--	--	--	--	--	--	S	Function unknown	hypothetical protein EURHEDRAFT_455836 [Aspergillus ruber CBS 135680]
1229	[FR]	Nucleotide transport and metabolism;; General function prediction only	Biological Process: guanine catabolic process (GO:0006147);; Molecular Function: zinc ion binding (GO:0008270);; Molecular Function: guanine deaminase activity (GO:0008892);;	K01487|3.31476e-53|pcs:Pc20g15520|Pc20g15520; K01487 guanine deaminase [EC:3.5.4.3] (A)	../inputs/Monascus_purpureus.newGene.longest_transcript.fa.Kegg.pathway	--	--	--	Probable guanine deaminase GN=GUD1 OS=Saccharomyces cerevisiae (strain ATCC 204508 / S288c) PE=1 SV=1	F	Nucleotide transport and metabolism	Guanine deaminase, putative [Penicillium digitatum PHI26]
1065	--	--	--	K13989|3.38979e-50|act:ACLA_008980|hypothetical protein; K13989 Derlin-2/3 (A)	../inputs/Monascus_purpureus.newGene.longest_transcript.fa.Kegg.pathway	--	--	Der1-like family	--	S	Function unknown	conserved hypothetical protein [Aspergillus clavatus NRRL 1]
1241	--	--	--	--	--	--	--	--	--	--	--	unnamed protein product [Penicillium roqueforti FM164]
481	--	--	--	--	--	--	--	--	--	R	General function prediction only	hypothetical protein PDIP_59740 [Penicillium digitatum Pd1]
669	--	--	--	--	--	--	--	--	--	S	Function unknown	unnamed protein product [Aspergillus niger]
1235	--	--	--	--	--	--	--	--	--	--	--	predicted protein [Histoplasma capsulatum H143]
207	--	--	Molecular Function: hydrolase activity (GO:0016787);;	--	--	--	--	--	--	R	General function prediction only	hypothetical protein NECHADRAFT_51868 [Nectria haematococca mpVI 77-13-4]
896	--	--	--	--	--	--	--	DDE superfamily endonuclease;; helix-turn-helix, Psq domain	--	S	Function unknown	transposase [Aspergillus fumigatus]
1288	[S]	Function unknown	--	--	--	--	--	Glutathione-dependent formaldehyde-activating enzyme	--	S	Function unknown	Glutathione-dependent formaldehyde-activating enzyme/centromere protein V [Penicillium expansum]
745	--	--	--	--	--	--	--	--	--	S	Function unknown	hypothetical protein AFUA_6G14450 [Aspergillus fumigatus Af293]
369	--	--	Molecular Function: transferase activity, transferring acyl groups (GO:0016746);; Biological Process: secondary metabolic process (GO:0019748);;	--	--	--	--	Beta-ketoacyl synthase, N-terminal domain;; Thiolase, N-terminal domain	Conidial yellow pigment biosynthesis polyketide synthase GN=wA OS=Emericella nidulans (strain FGSC A4 / ATCC 38163 / CBS 112.46 / NRRL PE=1 SV=2	Q	Secondary metabolites biosynthesis, transport and catabolism	non-reducing polyketide synthase, partial [Monascus purpureus]
1152	--	--	--	--	--	--	--	--	--	--	--	hypothetical protein V498_01388 [Pseudogymnoascus pannorum VKM F-4517 (FW-2822)]
1279	--	--	Molecular Function: metal ion binding (GO:0046872);;	--	--	[R]	General function prediction only	Zinc-ribbon;; CHY zinc finger;; Ring finger domain;; Zinc finger, C3HC4 type (RING finger);; Zinc finger, C3HC4 type (RING finger)	Uncharacterized RING finger protein C2F3.16 GN=SPAC2F3.16 OS=Schizosaccharomyces pombe (strain 972 / ATCC 24843) PE=3 SV=1	O	Posttranslational modification, protein turnover, chaperones	Zn-finger protein [Aspergillus oryzae 3.042]
787	--	--	Molecular Function: aminoacyl-tRNA editing activity (GO:0002161);; Molecular Function: isoleucine-tRNA ligase activity (GO:0004822);; Molecular Function: ATP binding (GO:0005524);; Cellular Component: cytoplasm (GO:0005737);; Biological Process: isoleucyl-tRNA aminoacylation (GO:0006428);; Biological Process: regulation of translational fidelity (GO:0006450);;	--	--	--	--	--	--	S	Function unknown	hypothetical protein MPH_13357 [Macrophomina phaseolina MS6]
973	--	--	--	--	--	--	--	Tc5 transposase DNA-binding domain	--	S	Function unknown	Transposon, putative [Penicillium digitatum PHI26]
640	--	--	Molecular Function: binding (GO:0005488);;	--	--	--	--	--	--	R	General function prediction only	retrotransposon polyprotein, putative [Talaromyces stipitatus ATCC 10500]
643	--	--	Biological Process: lipid metabolic process (GO:0006629);; Molecular Function: phosphoric diester hydrolase activity (GO:0008081);;	--	--	--	--	--	Altered inheritance of mitochondria protein 6 (Precursor) GN=AIM6 OS=Saccharomyces cerevisiae (strain JAY291) PE=3 SV=1	S	Function unknown	Nucleic acid-binding, OB-fold [Penicillium expansum]
989	--	--	Molecular Function: protein binding (GO:0005515);; Biological Process: regulation of protein ubiquitination (GO:0031396);; Biological Process: response to drug (GO:0042493);;	--	--	[R]	General function prediction only	Arrestin (or S-antigen), N-terminal domain;; Arrestin (or S-antigen), C-terminal domain	Probable HECT-type ubiquitin ligase-interacting protein creD GN=creD OS=Neosartorya fischeri (strain ATCC 1020 / DSM 3700 / FGSC A1164 / NRRL PE=3 SV=1	R	General function prediction only	carbon catabolite repression protein CreD [Aspergillus kawachii IFO 4308]
372	--	--	Biological Process: biosynthetic process (GO:0009058);; Molecular Function: transferase activity (GO:0016740);; Molecular Function: hydrolase activity, acting on ester bonds (GO:0016788);;	--	--	--	--	Phosphopantetheine attachment site;; Polyketide synthase dehydratase;; Thioesterase domain;; Thioesterase domain	Conidial yellow pigment biosynthesis polyketide synthase GN=wA OS=Emericella nidulans (strain FGSC A4 / ATCC 38163 / CBS 112.46 / NRRL PE=1 SV=2	I	Lipid transport and metabolism	polyketide synthase [Monascus purpureus]
806	--	--	--	--	--	--	--	--	--	--	--	hypothetical protein TRIVIDRAFT_230775 [Trichoderma virens Gv29-8]
1181	--	--	--	--	--	--	--	--	--	S	Function unknown	conserved hypothetical protein [Aspergillus clavatus NRRL 1]
832	--	--	--	--	--	--	--	--	--	S	Function unknown	hypothetical protein CPC735_017220 [Coccidioides posadasii C735 delta SOWgp]
1035	--	--	Biological Process: prostaglandin biosynthetic process (GO:0001516);; Molecular Function: peroxidase activity (GO:0004601);; Molecular Function: iron ion binding (GO:0005506);; Biological Process: response to oxidative stress (GO:0006979);; Molecular Function: electron carrier activity (GO:0009055);; Molecular Function: oxidoreductase activity, acting on single donors with incorporation of molecu…	K17863|6.70714e-11|ang:ANI_1_966184|An04g05880; fatty acid oxygenase; K17863 linoleate 8R-lipoxygenase / 9,12-octadecadienoate 8-hydroperoxide 8R-isomerase [EC:1.13.11.60 5.4.4.5] (A)	../inputs/Monascus_purpureus.newGene.longest_transcript.fa.Kegg.pathway	--	--	--	9,12-octadecadienoate 8-hydroperoxide 8R-isomerase GN=ppoA OS=Neosartorya fumigata (strain CEA10 / CBS 144.89 / FGSC A1163) PE=3 SV=1	R	General function prediction only	hypothetical protein ATEG_03992 [Aspergillus terreus NIH2624]
653	[R]	General function prediction only	Biological Process: metabolic process (GO:0008152);; Molecular Function: hydrolase activity (GO:0016787);;	K18338|3.51825e-132|ang:ANI_1_134114|An13g00940; amidohydrolase family protein; K18338 L-rhamnono-1,4-lactonase [EC:3.1.1.65] (A)	../inputs/Monascus_purpureus.newGene.longest_transcript.fa.Kegg.pathway	--	--	Amidohydrolase	L-rhamnono-gamma-lactonase GN=LRA2 OS=Scheffersomyces stipitis (strain ATCC 58785 / CBS 6054 / NBRC 10063 / PE=1 SV=2	R	General function prediction only	amidohydrolase family protein [Aspergillus kawachii IFO 4308]
1295	--	--	--	--	--	--	--	--	--	S	Function unknown	unnamed protein product [Aspergillus oryzae RIB40]
1028	--	--	--	--	--	--	--	--	--	S	Function unknown	conserved hypothetical protein [Aspergillus fumigatus Af293]
213	--	--	--	--	--	--	--	14-3-3 protein	--	S	Function unknown	conserved hypothetical protein [Aspergillus fumigatus Af293]
15	--	--	--	--	--	--	--	--	--	S	Function unknown	integral membrane protein PTH11-like protein [Aspergillus niger CBS 513.88]
894	--	--	--	--	--	--	--	--	Uncharacterized endoplasmic reticulum membrane protein C1709.03 (Precursor) GN=SPBC1709.03 OS=Schizosaccharomyces pombe (strain 972 / ATCC 24843) PE=3 SV=2	S	Function unknown	hypothetical protein EURHEDRAFT_411632 [Aspergillus ruber CBS 135680]
487	--	--	--	--	--	--	--	--	--	S	Function unknown	hypothetical protein NFIA_049860 [Neosartorya fischeri NRRL 181]
1209	--	--	Molecular Function: transferase activity (GO:0016740);;	K00545|6.25646e-09|bcom:BAUCODRAFT_80013|hypothetical protein; K00545 catechol O-methyltransferase [EC:2.1.1.6] (A)	../inputs/Monascus_purpureus.newGene.longest_transcript.fa.Kegg.pathway	--	--	--	--	Q	Secondary metabolites biosynthesis, transport and catabolism	hypothetical protein TCE0_060r18866 [Talaromyces cellulolyticus]
430	--	--	--	--	--	--	--	--	--	S	Function unknown	hypothetical protein PEXP_001890 [Penicillium expansum]
853	--	--	--	--	--	--	--	--	--	--	--	phosphotransferase enzyme family protein [Talaromyces cellulolyticus]
902	--	--	Molecular Function: transferase activity, transferring phosphorus-containing groups (GO:0016772);;	--	--	--	--	--	--	S	Function unknown	conserved hypothetical protein [Histoplasma capsulatum G186AR]
955	--	--	Cellular Component: mitochondrial intermembrane space (GO:0005758);;	K18185|6.24084e-33|aor:AOR_1_1444144|cytochrome c oxidase-assembly factor cox23; K18185 cytochrome c oxidase assembly protein subunit 23 (A)	--	[S]	Function unknown	Domain of unknown function (DUF1903)	Cytochrome c oxidase-assembly factor cox23, mitochondrial (Precursor) GN=cox23 OS=Aspergillus clavatus (strain ATCC 1007 / CBS 513.65 / DSM 816 / NCTC PE=3 SV=2	S	Function unknown	cytochrome c oxidase-assembly factor cox23 [Aspergillus oryzae RIB40]
1304	--	--	Molecular Function: transferase activity, transferring phosphorus-containing groups (GO:0016772);;	--	--	--	--	--	--	R	General function prediction only	conserved hypothetical protein [Arthroderma otae CBS 113480]
1266	[V]	Defense mechanisms	Molecular Function: nucleoside-triphosphatase activity (GO:0017111);;	--	--	[Q]	Secondary metabolites biosynthesis, transport and catabolism	--	ATP-dependent bile acid permease GN=YBT1 OS=Saccharomyces cerevisiae (strain ATCC 204508 / S288c) PE=1 SV=2	V	Defense mechanisms	hypothetical protein ATEG_04667 [Aspergillus terreus NIH2624]
422	--	--	--	--	--	--	--	--	--	S	Function unknown	predicted protein [Histoplasma capsulatum NAm1]
190	--	--	Molecular Function: organic cyclic compound binding (GO:0097159);; Molecular Function: heterocyclic compound binding (GO:1901363);;	--	--	--	--	--	--	D	Cell cycle control, cell division, chromosome partitioning	meiosis protein MEI2 [Aspergillus oryzae RIB40]
258	--	--	--	--	--	--	--	--	--	S	Function unknown	involucrin repeat protein, putative [Aspergillus clavatus NRRL 1]
317	--	--	Molecular Function: metal ion binding (GO:0046872);;	--	--	--	--	Protein of unknown function (DUF3435);; Protein of unknown function (DUF3435)	--	R	General function prediction only	FluG domain protein [Talaromyces stipitatus ATCC 10500]
39	--	--	--	--	--	--	--	--	--	R	General function prediction only	hypothetical protein NFIA_022120 [Neosartorya fischeri NRRL 181]
701	--	--	Cellular Component: nucleus (GO:0005634);; Biological Process: regulation of transcription, DNA-templated (GO:0006355);;	K15151|9.86641e-31|ang:ANI_1_1290164|An18g03640; mediator of RNA polymerase II transcription subunit 10; K15151 mediator of RNA polymerase II transcription subunit 10 (A)	--	[K]	Transcription	--	Mediator of RNA polymerase II transcription subunit 10 GN=nut2 OS=Aspergillus terreus (strain NIH 2624 / FGSC A1156) PE=3 SV=1	K	Transcription	RNA polymerase II mediator complex protein Nut2 [Aspergillus kawachii IFO 4308]
1264	--	--	--	K01175|7.99485e-12|afm:AFUA_2G17260|phosphoesterase (EC:3.1.-.-); K01175 [EC:3.1.-.-] (A)	--	--	--	--	Probable rhamnogalacturonate lyase C (Precursor) GN=rglC OS=Emericella nidulans (strain FGSC A4 / ATCC 38163 / CBS 112.46 / NRRL PE=3 SV=1	R	General function prediction only	phosphoesterase, putative [Aspergillus fumigatus A1163]
497	--	--	--	--	--	--	--	--	--	S	Function unknown	unnamed protein product [Aspergillus niger]
1278	--	--	--	--	--	--	--	--	--	S	Function unknown	hypothetical protein TCE0_042f14158 [Talaromyces cellulolyticus]
474	--	--	--	--	--	--	--	--	--	--	--	hypothetical protein V491_00499 [Pseudogymnoascus pannorum VKM F-3775]
1086	--	--	--	--	--	--	--	--	--	S	Function unknown	hypothetical protein ASPNIDRAFT_41214 [Aspergillus niger ATCC 1015]
83	--	--	--	--	--	--	--	--	--	S	Function unknown	predicted protein [Histoplasma capsulatum NAm1]
807	[V]	Defense mechanisms	Molecular Function: malate synthase activity (GO:0004474);; Molecular Function: ATP binding (GO:0005524);; Biological Process: glyoxylate cycle (GO:0006097);; Biological Process: tricarboxylic acid cycle (GO:0006099);; Biological Process: ATP catabolic process (GO:0006200);; Biological Process: transport (GO:0006810);; Cellular Component: integral component of membrane (GO:0016021);; Molecular Fu…	--	--	--	--	ABC-2 type transporter	Brefeldin A resistance protein GN=bfr1 OS=Schizosaccharomyces pombe (strain 972 / ATCC 24843) PE=1 SV=1	Q	Secondary metabolites biosynthesis, transport and catabolism	pleiotropic drug resistance proteins (PDR1-15), ABC superfamily [Aspergillus oryzae 3.042]
253	--	--	Molecular Function: binding (GO:0005488);;	--	--	--	--	Zinc finger, C2H2 type	--	R	General function prediction only	hypothetical protein ANI_1_1026084 [Aspergillus niger CBS 513.88]
1025	--	--	--	--	--	--	--	--	--	S	Function unknown	unnamed protein product [Aspergillus oryzae RIB40]
861	[I]	Lipid transport and metabolism	--	--	--	--	--	--	Lipase 4 (Precursor) GN=LIP4 OS=Candida rugosa (Yeast) PE=3 SV=1	R	General function prediction only	Carboxylesterase, type B [Penicillium italicum]
1106	--	--	--	--	--	--	--	--	--	S	Function unknown	hypothetical protein PEX2_049610 [Penicillium expansum]
1076	--	--	Cellular Component: fungal-type vacuole membrane (GO:0000329);; Biological Process: invasive growth in response to glucose limitation (GO:0001403);; Cellular Component: endosome (GO:0005768);; Biological Process: cellular copper ion homeostasis (GO:0006878);; Biological Process: vacuolar transport (GO:0007034);; Biological Process: pseudohyphal growth (GO:0007124);; Cellular Component: integral c…	K17086|3.74629e-72|ang:ANI_1_142054|An06g01200; endosomal integral membrane protein (P24a); K17086 transmembrane 9 superfamily member 2/4 (A)	--	[U]	Intracellular trafficking, secretion, and vesicular transport	Endomembrane protein 70	Protein p24a (Precursor) OS=Saccharomyces cerevisiae (strain ATCC 204508 / S288c) PE=1 SV=2	U	Intracellular trafficking, secretion, and vesicular transport	putative endosomal integral membrane protein [Aspergillus ruber CBS 135680]
722	--	--	Molecular Function: DNA binding (GO:0003677);; Molecular Function: zinc ion binding (GO:0008270);;	--	--	--	--	DDE superfamily endonuclease	--	S	Function unknown	transposase [Aspergillus fumigatus]
1061	--	--	--	--	--	--	--	Wings apart-like protein regulation of heterochromatin	--	S	Function unknown	Wings apart-like protein [Penicillium expansum]
226	--	--	--	--	--	--	--	--	--	R	General function prediction only	GNAT family acetyltransferase [Talaromyces cellulolyticus]
1337	--	--	Molecular Function: protein kinase activity (GO:0004672);; Biological Process: phosphorylation (GO:0016310);;	--	--	--	--	--	--	T	Signal transduction mechanisms	protein kinase domain-containing protein [Metarhizium anisopliae]
1200	--	--	--	--	--	--	--	--	--	--	--	hypothetical protein EURHEDRAFT_407297 [Aspergillus ruber CBS 135680]
1141	--	--	--	--	--	--	--	--	--	S	Function unknown	C2H2 finger domain protein [Aspergillus kawachii IFO 4308]
300	--	--	--	K00477|1.55784e-40|afm:AFUA_1G10170|hypothetical protein; K00477 phytanoyl-CoA hydroxylase [EC:1.14.11.18] (A)	../inputs/Monascus_purpureus.newGene.longest_transcript.fa.Kegg.pathway	--	--	--	--	S	Function unknown	conserved hypothetical protein [Aspergillus fumigatus Af293]
1325	--	--	--	K02980|6.84594e-06|aor:AOR_1_670154|40S ribosomal protein S29; K02980 small subunit ribosomal protein S29e (A)	../inputs/Monascus_purpureus.newGene.longest_transcript.fa.Kegg.pathway	--	--	--	--	--	--	--
508	--	--	--	--	--	--	--	--	--	S	Function unknown	hypothetical protein V496_05053 [Pseudogymnoascus pannorum VKM F-4515 (FW-2607)]
1180	--	--	--	--	--	--	--	--	--	S	Function unknown	conserved hypothetical protein [Aspergillus clavatus NRRL 1]
81	--	--	--	--	--	--	--	--	S-adenosyl-L-methionine-dependent N-methyltransferase GN=ESYN1 OS=Fusarium equiseti (Fusarium scirpi) PE=1 SV=2	R	General function prediction only	enniatin synthetase [Arthroderma otae CBS 113480]
1030	--	--	--	--	--	--	--	DDE superfamily endonuclease	--	S	Function unknown	transposase [Aspergillus fumigatus]
998	--	--	Molecular Function: zinc ion binding (GO:0008270);;	--	--	--	--	--	--	S	Function unknown	conserved hypothetical protein [Aspergillus terreus NIH2624]
601	--	--	--	--	--	--	--	--	--	S	Function unknown	hypothetical protein M437DRAFT_80884 [Aureobasidium melanogenum CBS 110374]
239	--	--	Molecular Function: translation release factor activity (GO:0003747);; Biological Process: translational termination (GO:0006415);; Molecular Function: hydrolase activity (GO:0016787);;	--	--	[J]	Translation, ribosomal structure and biogenesis	--	Uncharacterized peptide chain release factor-like protein YLR281C, mitochondrial (Precursor) GN=YLR281C OS=Saccharomyces cerevisiae (strain ATCC 204508 / S288c) PE=1 SV=1	J	Translation, ribosomal structure and biogenesis	hypothetical protein ASPNIDRAFT_137541 [Aspergillus niger ATCC 1015]
590	--	--	--	--	--	--	--	Protein of unknown function (DUF3505)	--	--	--	--
56	--	--	Biological Process: acyl-CoA metabolic process (GO:0006637);; Molecular Function: acyl-CoA hydrolase activity (GO:0047617);;	--	--	--	--	Acyl-CoA thioesterase;; Thioesterase-like superfamily	--	I	Lipid transport and metabolism	predicted protein [Aspergillus terreus NIH2624]
905	--	--	--	--	--	--	--	--	--	G	Carbohydrate transport and metabolism	hypothetical protein THITE_2122161 [Thielavia terrestris NRRL 8126]
1098	--	--	--	--	--	--	--	--	--	S	Function unknown	hypothetical protein PDE_02158 [Penicillium oxalicum 114-2]
635	--	--	--	--	--	--	--	--	--	R	General function prediction only	hypothetical protein TRV_07631 [Byssochlamys spectabilis No. 5]
338	--	--	--	--	--	--	--	--	--	S	Function unknown	hypothetical protein V501_05701 [Pseudogymnoascus pannorum VKM F-4519 (FW-2642)]
1189	--	--	Biological Process: hemolysis by symbiont of host erythrocytes (GO:0019836);;	K10991|2.32023e-22|afm:AFUA_5G06080|DNA repair protein Swi5/Sae3; K10991 DNA repair protein Swi5/Sae3 (A)	--	--	--	--	--	L	Replication, recombination and repair	DNA repair protein Swi5/Sae3 [Aspergillus fumigatus Af293]
668	--	--	Biological Process: transcription, DNA-templated (GO:0006351);;	--	--	--	--	Fungal specific transcription factor domain	--	S	Function unknown	hypothetical protein OIDMADRAFT_37988 [Oidiodendron maius Zn]
351	--	--	Molecular Function: binding (GO:0005488);;	--	--	--	--	--	--	S	Function unknown	hypothetical protein PDE_01475 [Penicillium oxalicum 114-2]
